# Supplementary material for: Iodine-catalyzed, highly atom-economic synthesis of 9-sulfenylphenanthrenes and polycyclic heteroaromatics in water
Source: Royal Society of Chemistry journal article supplement (doi:10.1039/d1gc03305k), 2021-01-01

# Supporting Information

## Iodine-catalyzed, highly atom-economic synthesis of 9-sulfenylphenanthrenes and polycyclic heteroaromatics in water

Nilanjana Mukherjee and Tanmay Chatterjee\*

Department of Chemistry, Birla Institute of Technology and Science, Pilani (BITS Pilani),  
Hyderabad Campus, Jawahar Nagar, Hyderabad 500078, Telangana, India

Email: [tanmay@hyderabad.bits-pilani.ac.in](mailto:tanmay@hyderabad.bits-pilani.ac.in)

### Contents

|                                                                                                                                                      |      |
|------------------------------------------------------------------------------------------------------------------------------------------------------|------|
| 1. General considerations                                                                                                                            | S-2  |
| 2. Experimental procedure for the synthesis of 2-alkynyl biaryls ( <b>1a-1m</b> )                                                                    | S-2  |
| 3. Experimental procedure for the synthesis of 2-(cyclopropylethynyl)-1,1'-biphenyl ( <b>1k</b> )                                                    | S-3  |
| 4. General experimental procedure for the synthesis of 9-sulfenylphenanthrenes and polycyclic heteroaromatics ( <b>3aa-3al</b> and <b>3ba-3ma</b> ). | S-3  |
| 4.1. Multigram-scale synthesis of phenyl(10-phenylphenanthren-9-yl)sulfane ( <b>3aa</b> )                                                            | S-4  |
| 5. <b>Table S1.</b> Calculation of EcoScale score for the I <sub>2</sub> catalyzed synthetic process                                                 | S-5  |
| 6. <b>Table S2.</b> Calculation of green metrics for the Pd-catalyzed synthetic process                                                              | S-6  |
| 7. <b>Table S3.</b> Calculation of EcoScale score for the Pd-catalyzed                                                                               | S-7  |
| 8. <b>Table S4.</b> Calculation of green metrics for the I <sub>2</sub> -catalyzed synthetic process                                                 | S-8  |
| 9. <b>Table S5.</b> Calculation of EcoScale score for the I <sub>2</sub> -catalyzed synthetic process                                                | S-9  |
| 10. <b>Figure 1</b> Mass spectrum of the reaction mixture of diphenyl disulfide and I <sub>2</sub>                                                   | S-10 |
| 11. Analytical data of Starting Material ( <b>1k</b> )                                                                                               | S-10 |
| 12. Analytical data of all synthesized products ( <b>3aa-3al</b> and <b>3ba-3ma</b> )                                                                | S-11 |
| 13. References                                                                                                                                       | S-18 |
| 14. NMR Spectra ( <sup>1</sup> H NMR and <sup>13</sup> C NMR)                                                                                        | S-19 |

## 1. General considerations

### General reagent information

All reagents and solvents were purchased from Sigma-Aldrich, TCI and AVRA chemical companies. Flash column chromatography was performed using silica gel (100-200 mesh).

### General analytical information

The starting materials such as 2-(phenylethynyl)-1,1'-biaryls and products such as 9-sulphenyl phenanthrenes and polycyclic heteroaromatics were characterized by  $^1\text{H}$  and  $^{13}\text{C}$  NMR. NMR spectra were recorded on a Bruker 400 MHz instrument (400 MHz for  $^1\text{H}$  NMR and 100 MHz for  $^{13}\text{C}$  NMR). Copies of  $^1\text{H}$  and  $^{13}\text{C}$  NMR spectra can be found at the end of the Supporting Information.  $^1\text{H}$  NMR experiments are reported in units, parts per million (ppm), and were measured relative to residual chloroform (7.26 ppm) in the deuterated solvent.  $^{13}\text{C}$  NMR spectra are reported in ppm relative to deuteriochloroform (77.00 ppm) and all were obtained with  $^1\text{H}$  decoupling. Coupling constants were reported in Hz. Reactions were monitored by thin layer chromatography (TLC) and  $^1\text{H}$ -NMR of the crude reaction mixture using 1,3,5-trimethoxybenzene as the internal standard. Mass spectral data of unknown compounds were obtained from BITS-Pilani, Pilani Campus, India on a high resolution mass spectrometer, HRMS (6545 Q-TOF LC/MS, Agilent). Melting points of unknown compounds were recorded on a KRUSS Optronic M3000 apparatus.

## 2. Experimental procedure for the synthesis of 2-alkynyl biaryls (1a-1m).

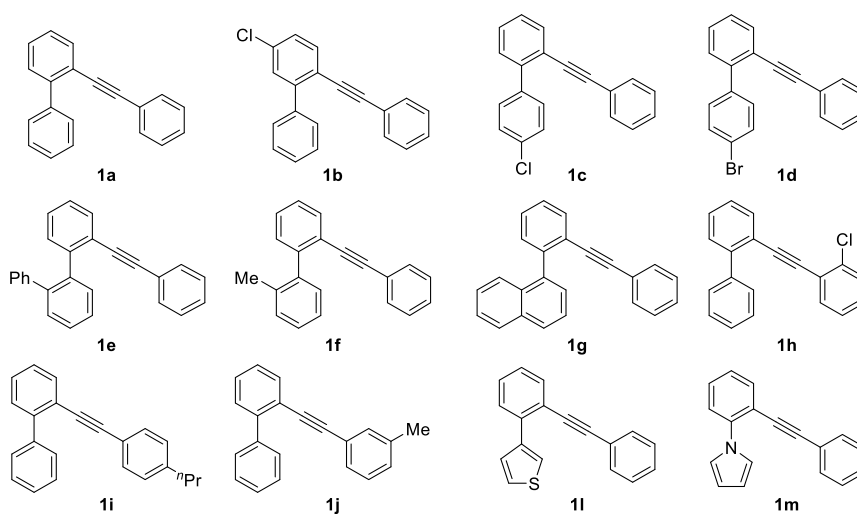

All starting materials except **1k** (**1a**,<sup>1</sup> **1b**,<sup>1</sup> **1c**,<sup>1</sup> **1d**,<sup>1</sup> **1e**,<sup>1</sup> **1f**,<sup>1</sup> **1g**,<sup>1</sup> **1h**,<sup>1</sup> **1i**,<sup>1</sup> **1j**,<sup>1</sup> **1l**,<sup>1</sup> **1m**<sup>2</sup>) were synthesized by following a literature protocol and characterized by <sup>1</sup>H and <sup>13</sup>C-NMR.<sup>1,2</sup>

### 3. Experimental procedure for the synthesis of 2-(cyclopropylethynyl)-1,1'-biphenyl (**1k**).

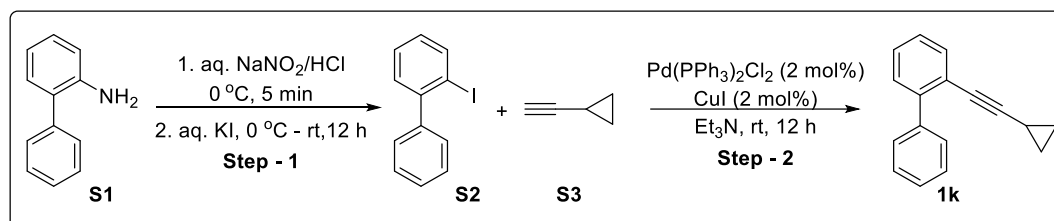

**Step-1:** 2-Iodo-1,1'-biphenyl **S2** was synthesized from [1,1'-biphenyl]-2-amine **S1** by following a reported protocol.<sup>1</sup>

**Step-2:** 2-iodo-1,1'-biphenyl **S2** (1.4 g, 5 mmol, 1 equiv), Pd(PPh<sub>3</sub>)<sub>2</sub>Cl<sub>2</sub> (0.07 g, 0.1 mmol), CuI (0.019 g, 0.1 mmol) and Et<sub>3</sub>N (13 mL) were added in a flame-dried two neck round bottomed flask (RBF) under N<sub>2</sub> atmosphere in a standard Schlenk-line process and stirred for 5 min at room temperature. Cyclopropylacetylene **S3** (508 μL, 6 mmol, 1.2 equiv) was then added to the reaction mixture under nitrogen atmosphere. The reaction mixture was stirred for 12 h at room temperature. After the completion of the reaction, Et<sub>3</sub>N was evaporated under reduced pressure. The crude reaction mixture was diluted with ethyl acetate (30 mL) and washed with water three times (3 x 10 mL). The solvent was evaporated under reduced pressure and the crude product was purified through silica gel column chromatography to provide 2-(cyclopropylethynyl)-1,1'-biphenyl **1k** (0.436 g, 2 mmol) in 40% yield.

**4. General experimental procedure for the synthesis of 9-sulfenylphenanthrenes and polycyclic Heteroaromatics (3aa-3al and 3ba-3ma). Representative experimental procedure for the synthesis of phenyl(10-phenylphenanthren-9-yl)sulfane (3aa):** Phenyl(10-phenylphenanthren-9-yl)sulfane **1a** (0.127 g, 0.5 mmol, 1 equiv), 1,2-diphenyldisulfane **2a** (0.065 g, 0.3 mmol, 0.6 equiv) and I<sub>2</sub> (0.0254 g, 0.1 mmol) were taken in a RBF and H<sub>2</sub>O (0.3 mL, 1.6 M) was added to it. Then H<sub>2</sub>O<sub>2</sub> (0.02 mL, 0.25 mmol, 0.5 equiv) was added to the RBF and the reaction mixture was stirred in an oil bath at 60 °C under aerobic atmosphere. The progress of the reaction was monitored by TLC. After completion of the reaction, iodine was quenched with

saturated sodium thiosulfate solution and ethyl acetate (30 mL) was added to the reaction mixture. The whole solution was then transferred to a separating funnel for extraction. The reaction mixture was extracted with ethyl acetate twice (2 X 10 mL) and the combined organic layer was washed with water (3 X 10 mL). The solvent was evaporated under reduced pressure to afford the crude product which was purified by flash column chromatography through silica gel to afford the pure product, phenyl(10-phenylphenanthren-9-yl)sulfane **3aa** (0.167 g, 0.46 mmol) in 92% yield.

**4.1. Multigram-scale synthesis of phenyl(10-phenylphenanthren-9-yl)sulfane (3aa) :** Phenyl(10-phenylphenanthren-9-yl)sulfane **1a** (10.17 g, 40 mmol, 1 equiv), 1,2-diphenyldisulfane **2a** (5.24 g, 24 mmol, 0.6 equiv) and I<sub>2</sub> (2.03 g, 8 mmol) were taken in a RBF and H<sub>2</sub>O (24.4 mL, 1.6 M) was added to it. Then H<sub>2</sub>O<sub>2</sub> (1.6 mL, 20 mmol, 0.5 equiv) was added to the RBF and the reaction mixture was stirred in an oil bath at 60 °C under aerobic atmosphere. The progress of the reaction was monitored by TLC. After completion of the reaction, iodine was quenched with saturated sodium thiosulfate solution and ethyl acetate was added to the reaction mixture. The whole solution was then transferred to a separating funnel for extraction. The reaction mixture was extracted with ethyl acetate twice and the combined organic layer was washed with water. The solvent was evaporated under reduced pressure to afford the crude product which was purified by flash column chromatography through silica gel to afford the pure product, phenyl(10-phenylphenanthren-9-yl)sulfane **3aa** (10.95 g, 30.2 mmol) in 75.52% yield.

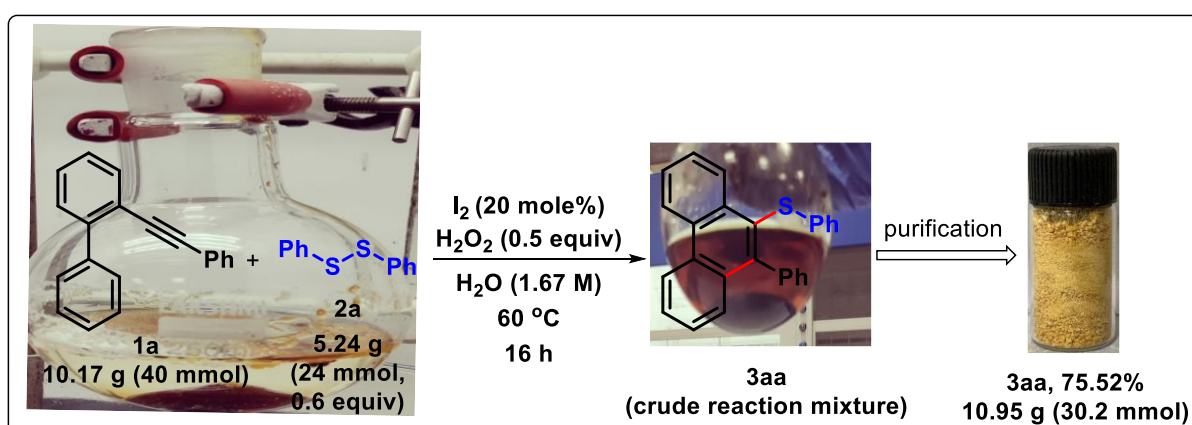

**5. Table S1. Calculation of EcoScale score for the I<sub>2</sub> catalyzed synthetic process in water to synthesize phenyl(10-phenylphenanthren-9-yl)sulfane (3aa) from 2-(phenylethynyl)-1,1'-biphenyl (1a) and diphenyl diselenide (2a) (this work)**

**EcoScale Calculation:**

**Eco Scale = 100 - Sum of individual penalties**  
**Score on Eco Scale: > 75, Excellent; >50, acceptable; <50, Inadequate**

**A. Calculation of Penalty Points :**

| Parameters                                                                               | Penalty Points |
|------------------------------------------------------------------------------------------|----------------|
| 1. Yield: <span style="float: right;">(100 - % of yield)/2 = (100 - 92)/2</span>         | 4              |
| 2. Price of reaction components (To obtain 10 mmol of end product, <b>3aa</b> )          |                |
| a. 2-(Phenylethynyl)-1,1'-biphenyl = 10.87 mmole                                         |                |
| [ Synthesis cost : Required Chemicals :                                                  |                |
| i) [1,1'-biphenyl]-2-amine = 2.74 g = USD 7.85                                           |                |
| ii) HCl = 8.32 mL = USD 0.264                                                            |                |
| iii) NaNO <sub>2</sub> = 1.344 g = USD 0.0062                                            |                |
| iv) KI = 4 g = USD 1.272                                                                 |                |
| v) Bis(triphenyl phosphine)Pd(II) dichloride = 0.095 g = USD 1.81                        |                |
| vi) CuI = 0.025 g = USD 0.0083                                                           |                |
| vii) Phenyl acetylene = 1.79 mL = USD 0.765                                              |                |
| viii) Triethylamine = 35.36 mL = USD 0.375                                               |                |
| b. 1,2-Diphenyldisulfane = 6.5 mmole = 1.423 g = USD 0.911                               |                |
| c. Iodine (As catalyst) = 2.17 mmole = 0.552 g = USD 0.163                               |                |
| d. Hydrogen Peroxide (30% aqueous solution) = 0.42 mL = USD 0.11                         |                |
| Total cost of synthesis of <b>3aa</b> = (13.84 + 0.911 + 0.163 + 0.11) = USD 15.024      |                |
| Thus expensive, since \$10 < (total cost of synthesis of 10 mmol of <b>3aa</b> ) < \$50: | 3              |
| 3. Safety                                                                                |                |
| 1,2-Diphenyldisulfane (T)                                                                | 5              |
| Iodine (T)                                                                               | 5              |
| 4. Technical Setup                                                                       |                |
| Common Setup                                                                             | 0              |
| 5. Temperature/ Time                                                                     |                |
| 60 °C, 14 h (Heating, > 1h)                                                              | 3              |
| 6. Work up and purification :                                                            |                |
| a. Adding solvent                                                                        | 0              |
| b. Liquid-Liquid extraction                                                              | 3              |
| c. Classical Chromatography                                                              | 10             |
| <b>Total penalty points:</b>                                                             | <b>33</b>      |

**B. Ecoscale calculation:**

**EcoScale score: (100 - 33) = 67 (>50; it is an acceptable synthesis)**

6. Table S2. Calculation of green metrics for the Pd-catalyzed synthetic process to synthesize phenyl(10-phenylphenanthren-9-yl)sulfane (3aa) from 2-(phenylethynyl)-1,1'-biphenyl (1a) and diphenyl diselenide (2a)<sup>3</sup>

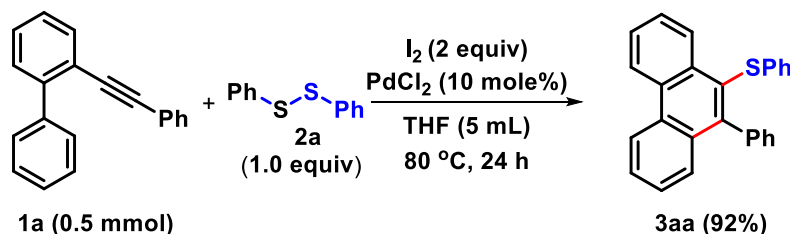

Yield of desired product (3aa) = 95%

$$\text{Atom Economy (\%)} = \frac{\text{mass of desired product}}{\text{total mass of all reactants}} \times 100 = \frac{362.49}{254.33 + 218.33 + (2 \times 253.81)} \times 100 = \mathbf{36.98\%}$$

$$\text{Atom Efficiency (\%)} = (\% \text{yield of product} \times \% \text{atom economy}) \times 100 = (95\% \times 36.98\%) \times 100 = \mathbf{35.13\%}$$

$$\text{Carbon Efficiency (\%)} = \frac{\text{amount of carbon in desired product}}{\text{total amount of carbon presented in all reactants}} \times 100 = \frac{26}{20 + 12} \times 100 = \mathbf{81.3\%}$$

$$\text{Reaction Mass Efficiency (\%)} = \frac{\text{mass of isolated product}}{\text{mass of all reactants}} \times 100 = \frac{0.172}{0.127 + 0.109 + 0.253} \times 100 = \mathbf{35.17\%}$$

|             |                                          |         |            |             |
|-------------|------------------------------------------|---------|------------|-------------|
| Reactant 1: | 2-(Phenylethynyl) 1,1'-biphenyl (1a)     | 0.127 g | 0.5 mmol   | FW 254.332  |
| Reactant 2: | 1,2-Diphenyldisulfane (2a)               | 0.109 g | 0.5 mmol   | FW 218.332  |
| Catalyst 1: | Iodine                                   | 0.253 g | 1.0 mmol   | FW 253.8089 |
| Catalyst 2: | palladium(II) chloride                   | 0.008 g | 0.05 mmol  | FW 177.32   |
| Solvent:    | THF                                      | 4.44 g  | 61.57 mmol | FW 72.11    |
| Product:    | Phenyl(10-phenylphenanthren-9-yl)sulfane | 0.172 g | 0.47 mmol  | FW 362.49   |

$$\text{E-factor} = \frac{\text{total waste (Kg)}}{\text{total product (Kg)}} = \frac{(0.127 + 0.109 + 0.253 + 0.008 + 4.44) - 0.172}{0.172} = \mathbf{27.7 \text{ Kg waste/Kg pdt}}$$

**7. Table S3. Calculation of EcoScale score for the Pd-catalyzed synthetic process to synthesize phenyl(10-phenylphenanthren-9-yl)sulfane (3aa) from 2-(phenylethynyl)-1,1'-biphenyl (1a) and diphenyl diselenide (2a)<sup>3</sup>**

**Eco Scale Calculation:**

$$\text{Eco Scale} = 100 - \text{Sum of individual penalties}$$

Score on Eco Scale: > 75, Excellent; >50, acceptable; <50, Inadequate

**A. Calculation of Penalty Points :**

| Parameters                                                                               | Penalty Points |
|------------------------------------------------------------------------------------------|----------------|
| 1. Yield: $(100 - \% \text{ of yield})/2 = (100 - 95)/2 = 2.5$                           | <b>2.5</b>     |
| 2. Price of reaction components (To obtain 10 mmol of end product, <b>3aa</b> )          |                |
| a. 2-(Phenylethynyl)-1,1'-biphenyl = 10.64 mmole = 2.94 g = USD 13.55                    |                |
| [ Synthesis cost : Required Chemicals :                                                  |                |
| i) [1,1'-biphenyl]-2-amine = 2.65 g = USD 7.71                                           |                |
| ii) HCl = 8.13 mL = USD 0.26                                                             |                |
| iii) NaNO <sub>2</sub> = 1.31 g = USD 0.059                                              |                |
| iv) KI = 3.91 g = USD 1.24                                                               |                |
| v) Bis(triphenyl phosphine)Pd(II) dichloride = 0.093 g = USD 1.77                        |                |
| vi) CuI = 0.025 g = USD 0.0083                                                           |                |
| vii) Phenyl acetylene = 1.75 mL = USD 2.19                                               |                |
| viii) Triethylamine = 31.90 mL = USD 0.316                                               |                |
| b. 1,2-Diphenyldisulfane = 10.64 mmole = 2.32 g = USD 1.49                               |                |
| c. Iodine = 21.28 mmole = 5.40 g = USD 1.60                                              |                |
| d. Palladium(II) chloride (As catalyst) = 0.188 g = USD 13.35                            |                |
| e. THF = 106.4 mL = USD 8.34                                                             |                |
| Total cost of synthesis of <b>3aa</b> = (13.55 + 1.49 + 1.60 + 13.35 + 8.34) = USD 38.33 |                |
| Thus expensive, since \$10 < (total cost of synthesis of 10 mmol of <b>3aa</b> ) < \$50: | <b>3</b>       |
| 3. Safety                                                                                |                |
| 1,2-Diphenyldisulfane (T)                                                                | <b>5</b>       |
| Iodine (T)                                                                               | <b>5</b>       |
| Palladium(II) chloride (T)                                                               | <b>5</b>       |
| THF (T, F)                                                                               | <b>10</b>      |
| 4. Technical Setup                                                                       |                |
| Common Setup                                                                             | <b>0</b>       |
| Inert gas atmosphere                                                                     | <b>1</b>       |
| 5. Temperature/ Time                                                                     |                |
| 80 °C, 14 h (Heating, > 1h)                                                              | <b>3</b>       |
| 6. Work up and purification :                                                            |                |
| a. Adding solvent                                                                        | <b>0</b>       |
| b. Liquid-Liquid extraction                                                              | <b>3</b>       |
| c. Classical Chromatography                                                              | <b>10</b>      |
| <b>Total penalty points:</b>                                                             | <b>47.5</b>    |

**B. Ecoscale calculation:**

**Eco-scale Score: (100 - 47.5) = 52.5 (>50; it is an acceptable synthesis)**

8. Table S4. Calculation of green metrics for the I<sub>2</sub>-catalyzed synthetic process to synthesize phenyl(10-phenylphenanthren-9-yl)sulfane (3aa) from 2-(phenylethynyl)-1,1'-biphenyl (1a) and (methylsulfinyl)benzene (2a')<sup>1</sup>

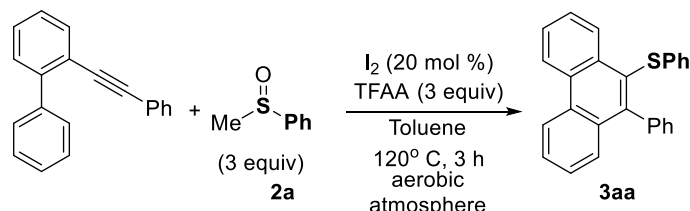

Yield of desired product (3aa) = 81%

$$\text{Atom Economy (\%)} = \frac{\text{mass of desired product}}{\text{total mass of all reactants}} \times 100 = \frac{362.49}{254.33 + [(3 \times 140.2) + (3 \times 210.3)]} \times 100 = 27.76\%$$

$$\text{Atom Efficiency (\%)} = (\% \text{yield of product} \times \% \text{atom economy}) \times 100 = (81\% \times 27.76\%) \times 100 = 22.48\%$$

$$\text{Carbon Efficiency (\%)} = \frac{\text{amount of carbon in desired product}}{\text{total amount of carbon presented in all reactants}} \times 100 = \frac{24}{20 + (3 \times 7) + (3 \times 4)} \times 100 = 45.28\%$$

$$\text{Reaction Mass Efficiency (\%)} = \frac{\text{mass of isolated product}}{\text{total mass of all reactants}} \times 100 = \frac{0.147}{0.127 + 0.210 + 0.315} \times 100 = 22.55\%$$

|             |                                                |         |            |             |
|-------------|------------------------------------------------|---------|------------|-------------|
| Reactant 1: | 2-(Phenylethynyl) 1,1'-biphenyl (1a)           | 0.127 g | 0.5 mmol   | FW 254.332  |
| Reactant 2: | Methyl Phenyl Sulfoxide                        | 0.210 g | 1.5 mmol   | FW 140.2    |
| Catalyst:   | Iodine                                         | 0.025 g | 0.1 mmol   | FW 253.8089 |
| Reagent :   | TFAA                                           | 0.315 g | 1.5 mmol   | FW 210.3    |
| Solvent:    | Toluene                                        | 1.083 g | 11.75 mmol | FW 92.14    |
| Product:    | phenyl(10-phenylphenanthren-9-yl)sulfane (3aa) | 0.147 g | 0.405 mmol | FW 362.49   |

$$\text{E-factor} = \frac{\text{total waste (Kg)}}{\text{total product (Kg)}} = \frac{(0.127 + 0.210 + 0.025 + 0.315 + 1.083) - 0.147}{0.147} = 10.97 \text{ Kg waste/Kg pdt}$$



**9. Table S5. Calculation of EcoScale score for the I<sub>2</sub>-catalyzed synthetic process to synthesize phenyl(10-phenylphenanthren-9-yl)sulfane (3aa) from 2-(phenylethynyl)-1,1'-biphenyl (1a) and (methylsulfinyl)benzene (2a')<sup>1</sup>**

**Eco Scale Calculation:**

$$\text{Eco Scale} = 100 - \text{Sum of individual penalties}$$

Score on Eco Scale: > 75, Excellent; >50, acceptable; <50, Inadequate

**A. Calculation of Penalty Points :**

| Parameters                                                                                  | Penalty Points |
|---------------------------------------------------------------------------------------------|----------------|
| (100 - % of yield)/2 = (100 - 81)/2                                                         |                |
| 1. Yield:                                                                                   | 9.5            |
| 2. Price of reaction components (To obtain 10 mmol of end product, <b>3aa</b> )             |                |
| a. 2-(Phenylethynyl)-1,1'-biphenyl = 12.35 mmol = 3.14 g = USD 15.72                        |                |
| [ Synthesis cost : Required Chemicals :                                                     |                |
| i) [1,1'-biphenyl]-2-amine = 3.07 g = USD 8.93                                              |                |
| ii) HCl = 9.44 mL = USD 0.30                                                                |                |
| iii) NaNO <sub>2</sub> = 1.53 g = USD 0.07                                                  |                |
| iv) KI = 4.54 g = USD 1.44                                                                  |                |
| v) Bis(triphenyl phosphine)Pd(II) dichloride = 0.108 g = USD 2.06                           |                |
| vi) CuI = 0.029 g = USD 0.0097                                                              |                |
| vii) Phenyl acetylene = 2.034 mL = USD 2.54                                                 |                |
| viii) Triethylamine = 37.06 mL = USD 0.37                                                   |                |
| b. Methyl Phenyl Sulfoxide = 37.05 mmol = 5.19 g = USD 28.65                                |                |
| c. Iodine (As catalyst) = 2.47 mmol = 0.627 g = USD 0.19                                    |                |
| d. TFAA = 5.16 mL = USD 0.97                                                                |                |
| e. Toluene = 30.88 mL = USD 1.13                                                            |                |
| Total cost of synthesis of <b>3aa</b> = (13.67 + 28.74 + 0.186 + 0.967 + 1.136) = USD 46.66 |                |
| Thus expensive, since \$10 < (total cost of synthesis of 10 mmol of <b>3aa</b> ) < \$50:    | 3              |
| 3. Safety                                                                                   |                |
| Methyl Phenyl Sulfoxide (T)                                                                 | 5              |
| Iodine (T)                                                                                  | 5              |
| TFAA                                                                                        | 5              |
| Toluene (F,T)                                                                               | 10             |
| 4. Technical Setup                                                                          | 0              |
| Common Setup                                                                                | 0              |
| 5. Temperature/time:                                                                        | 3              |
| 120 °C, 3 h (Heating, > 1h)                                                                 | 3              |
| 6. Work-up and purification:                                                                |                |
| Adding of solvents                                                                          | 0              |
| Liquid-liquid Extraction                                                                    | 3              |
| Column Chromatography                                                                       | 10             |
| <b>Total penalty points:</b>                                                                | <b>53.5</b>    |

**B. Ecoscale calculation:**

**Eco-scale Score: (100 - 53.5) = 46.5 (< 50, it is an inadequate synthesis)**

10.

## <Spectrum>

Line#:1 R.Time:----(Scan#:----)  
MassPeaks:20  
RawMode:Averaged 0.15-0.56(57-205) BasePeak:120(4073237)  
BG Mode:Averaged 0.01-0.15(3-55) Segment 1 - Event 1

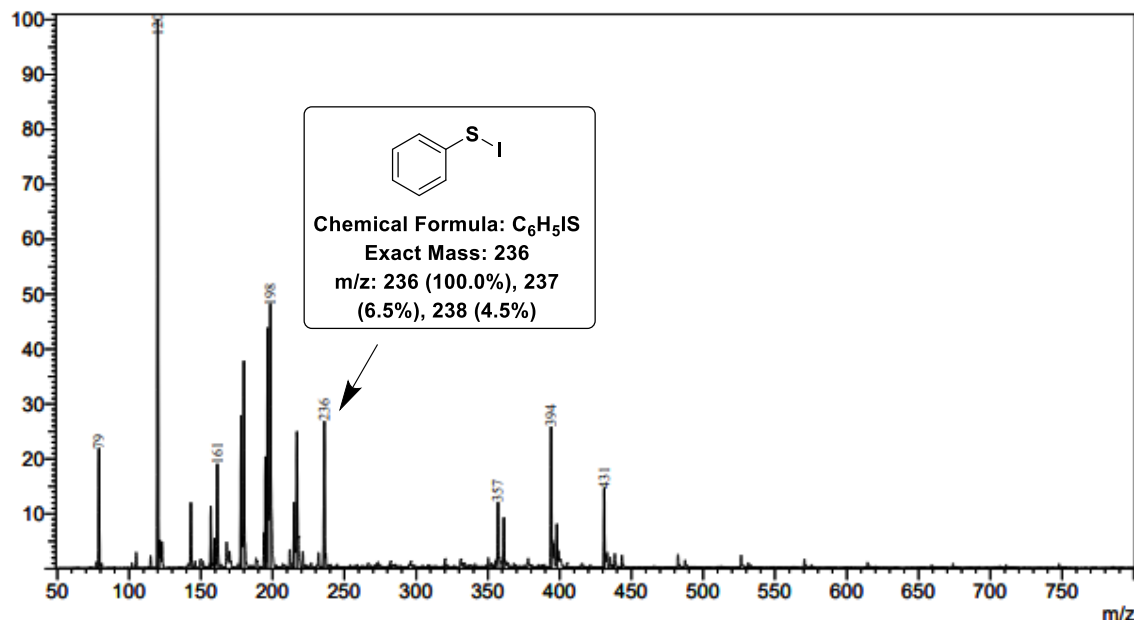

Figure 1 Mass spectrum of the reaction mixture of diphenyl disulfide and I<sub>2</sub>

## 11. Analytical data of starting material (1k)

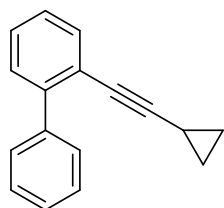

**2-(cyclopropylethynyl)-1,1'-biphenyl (1k).** Pale yellow liquid (0.436 g, 40%); eluent hexane; <sup>1</sup>H NMR (400 MHz, CDCl<sub>3</sub>) δ 7.62 – 7.56 (m, 2H), 7.53 – 7.48 (m, 1H), 7.45 – 7.40 (m, 2H), 7.39 – 7.34 (m, 2H), 7.33 – 7.28 (m, 1H), 7.24 (d, *J* = 1.7 Hz, 1H), 1.33 (ddd, *J* = 10.0, 6.6, 4.1 Hz, 1H), 0.81 – 0.74 (m, 2H), 0.68 – 0.60 (m, 2H). <sup>13</sup>C NMR (101 MHz, CDCl<sub>3</sub>) δ 143.64, 140.74, 132.84, 129.28, 129.21, 127.69, 127.59, 127.19, 126.87, 122.20, 96.44, 75.20, 8.32, 0.30. HRMS (ESI), *m/z* calcd for C<sub>17</sub>H<sub>15</sub> [M + H]<sup>+</sup>: 219.1168; found: 219.1158.

## 12. Analytical data of all synthesized products (3aa-3al and 3ba -3ma)

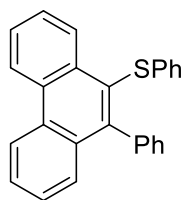

**Phenyl(10-phenylphenanthren-9-yl)sulfane (3aa).**<sup>3</sup> Yellow solid (0.167 g, 92%); eluent hexane; mp = 125–127 °C; <sup>1</sup>H NMR (400 MHz, CDCl<sub>3</sub>) δ 8.83 (dd, *J* = 8.2, 3.1 Hz, 2H), 8.72 (d, *J* = 8.2 Hz, 1H), 7.77 – 7.71 (m, 2H), 7.64 (dd, *J* = 8.0, 7.2 Hz, 1H), 7.60 – 7.53 (m, 2H), 7.51 – 7.46 (m, 3H), 7.36 – 7.32 (m, 2H), 7.13 (dd, *J* = 8.0, 7.0 Hz, 2H), 7.09 – 7.03 (m, 1H), 7.00 (d, *J* = 7.9 Hz, 2H). <sup>13</sup>C NMR (100 MHz, CDCl<sub>3</sub>) δ 146.82, 140.15, 138.97, 132.21, 132.04, 131.08, 130.87, 129.48, 128.70, 128.63, 128.02, 127.93, 127.61, 127.57, 127.34, 127.09, 127.05, 126.71, 126.33, 124.63, 122.74, 122.55.

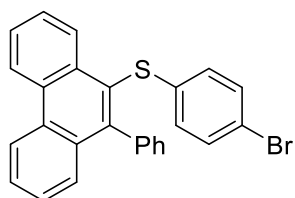

**(4-Bromophenyl)(10-phenylphenanthren-9-yl)sulfane (3ab)** : White solid (0.185 g, 84%); eluent hexane; mp = 166–168 °C; <sup>1</sup>H NMR (400 MHz, CDCl<sub>3</sub>) δ 8.69 (dd, *J* = 18.2, 8.2 Hz, 2H), 8.63 (d, *J* = 8.9 Hz, 1H), 7.78 (dd, *J* = 8.9, 2.1 Hz, 1H), 7.73 – 7.59 (m, 3H), 7.50 – 7.44 (m, 3H), 7.28 – 7.24 (m, 2H), 7.11 (t, *J* = 7.6 Hz, 2H), 7.07 – 7.02 (m, 1H), 6.93 (d, *J* = 8.1 Hz, 2H). <sup>13</sup>C NMR (100 MHz, CDCl<sub>3</sub>) δ 145.63, 139.34, 138.61, 133.68, 132.02, 130.76, 130.70, 130.41, 129.74, 129.46, 128.88, 128.71, 128.23, 128.16, 127.94, 127.70, 127.44, 126.51, 124.86, 124.38, 122.64, 121.06. Anal calcd for C<sub>26</sub>H<sub>17</sub>BrS: C, 70.75; H, 3.88; S, 7.26; found C, 70.91; H, 3.56; S, 7.41.

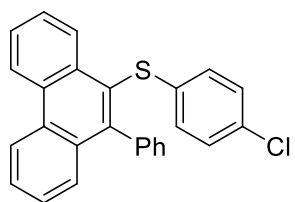

**(4-Chlorophenyl)(10-phenylphenanthren-9-yl)sulfane (3ac)** :<sup>3</sup> White solid (0.131 g, 66%); eluent hexane; mp = 115–117 °C; <sup>1</sup>H NMR (400 MHz, CDCl<sub>3</sub>) δ 8.81 – 8.78 (m, 2H), 8.58 (dd, *J* = 8.3, 1.0 Hz, 1H), 7.71 (m, 2H), 7.64 – 7.59 (m, 1H), 7.51 – 7.48 (m, 2H), 7.44 (dd, *J* = 4.9, 1.7 Hz, 3H), 7.24 (dd, *J* = 6.6, 3.0 Hz, 2H), 7.04 (d, *J* = 8.7 Hz, 2H), 6.82 (d, *J* = 8.7 Hz, 2H). <sup>13</sup>C NMR (100 MHz, CDCl<sub>3</sub>) δ 147.04, 140.01, 137.54, 132.17, 131.80, 131.17, 130.97, 130.47, 129.43, 128.78, 128.03, 127.82, 127.79, 127.71, 127.55, 127.50, 127.21, 126.84, 126.66, 122.87, 122.60.

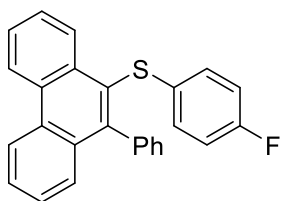

**(4-Fluorophenyl)(10-phenylphenanthren-9-yl)sulfane (3ad)** :<sup>3</sup>

Fluorescent Blue solid (0.144 g, 70%); eluent hexane; mp = 118–120 °C; <sup>1</sup>H NMR (400 MHz, CDCl<sub>3</sub>) δ 8.83 (d, *J* = 8.2 Hz, 2H), 8.76 (dd, *J* = 8.2, 1.2 Hz, 1H), 7.75 (ddt, *J* = 8.4, 6.8, 1.8 Hz, 2H), 7.69 (ddd, *J* = 8.2, 7.0, 1.3 Hz, 1H), 7.61 (dd, *J* = 8.3, 1.3 Hz, 1H), 7.58 – 7.54 (m, 1H), 7.54 – 7.51 (m, 3H), 7.34 (ddd, *J* = 4.0, 2.9, 1.5 Hz, 2H), 6.97 (dd, *J* = 9.0, 5.1 Hz, 2H), 6.86 (t, *J* = 8.8 Hz, 2H). <sup>13</sup>C NMR (100 MHz, CDCl<sub>3</sub>) δ 161.89, 159.46, 146.67, 140.02, 133.86, 133.84, 132.14, 131.91, 131.03, 130.91, 129.54, 128.64, 128.32, 128.25, 127.96, 127.85, 127.67, 127.58, 127.53, 127.38, 127.10, 126.76, 122.80, 122.54, 115.83, 115.61.

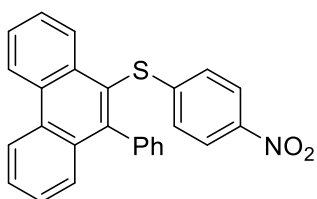

**(4-Nitrophenyl)(10-phenylphenanthren-9-yl)sulfane (3ae)** :<sup>3</sup>

Yellow crystalline solid (0.082 g, 36%); eluent hexane/EtOAc (10:1); mp = 188–190 °C; <sup>1</sup>H NMR (400 MHz, CDCl<sub>3</sub>) δ 8.83 (d, *J* = 8.4 Hz, 2H), 8.46 (dd, *J* = 8.3, 1.0 Hz, 1H), 7.93 (d, *J* = 9.1 Hz, 2H), 7.79 – 7.72 (m, 2H), 7.67 – 7.45 (m, 4H), 7.43 (dd, *J* = 4.7, 2.4 Hz, 2H), 7.24 – 7.21 (m, 2H), 6.96 (d, *J* = 9.1 Hz, 2H). <sup>13</sup>C NMR (100 MHz, CDCl<sub>3</sub>) δ 148.95, 147.78, 144.81, 139.61, 132.05, 131.41, 131.33, 131.07, 129.14, 128.96, 128.32, 128.16, 128.00, 127.80, 127.56, 127.18, 127.06, 125.60, 124.69, 123.89, 123.12, 122.71.

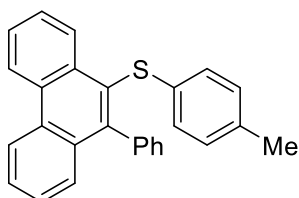

**(10-Phenylphenanthren-9-yl)(p-tolyl)sulfane (3af)** :<sup>3</sup> Yellow solid

(0.170 g, 90%); eluent hexane; mp = 105–107 °C; <sup>1</sup>H NMR (400 MHz, CDCl<sub>3</sub>) δ 8.82 (dd, *J* = 8.2, 4.4 Hz, 2H), 8.72 (dd, *J* = 8.3, 0.9 Hz, 1H), 7.76 – 7.70 (m, 2H), 7.66 – 7.61 (m, 1H), 7.59 – 7.52 (m, 2H), 7.51 – 7.48 (m, 3H), 7.37 – 7.31 (m, 2H), 6.92 (dd, *J* = 21.3, 8.3 Hz, 4H), 2.26 (s, 3H). <sup>13</sup>C NMR (100 MHz, CDCl<sub>3</sub>) δ 146.63, 140.25, 135.34, 134.38, 132.23, 132.07, 131.04, 130.88, 129.55, 129.44, 128.68, 128.12, 127.94, 127.52, 127.30, 126.98, 126.68, 126.47, 122.71, 122.54, 20.82.

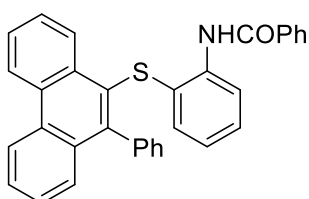

**N-(2-(10-Phenylphenanthren-9-yl)phenyl)benzamide (3ag)** : Off

White solid (0.145 g, 60%); eluent hexane/EtOAc (20:1); mp = 155–157 °C; <sup>1</sup>H NMR (400 MHz, CDCl<sub>3</sub>) δ 8.40 (dd, *J* = 7.8, 1.7 Hz, 1H), 8.36 – 8.27 (m, 2H), 7.78 (d, *J* = 8.0 Hz, 1H), 7.61 (s, 1H),

7.28 (s, 1H), 7.24 (d,  $J = 1.6$  Hz, 1H), 7.21 (ddd,  $J = 8.3, 5.1, 1.6$  Hz, 1H), 7.09 – 7.04 (m, 1H), 7.00 – 6.94 (m, 3H), 6.88 (dd,  $J = 8.3, 0.9$  Hz, 1H), 6.78 (dd,  $J = 5.3, 2.1$  Hz, 3H), 6.72 – 6.66 (m, 1H), 6.58 – 6.53 (m, 2H), 6.43 (dd,  $J = 7.9, 1.4$  Hz, 1H), 6.31 (m, 1H).  $^{13}\text{C}$  NMR (100 MHz,  $\text{CDCl}_3$ )  $\delta$  164.93, 146.03, 139.65, 136.45, 134.60, 132.76, 132.20, 131.64, 130.78, 130.71, 130.57, 129.41, 128.63, 128.50, 128.22, 128.16, 128.08, 127.83, 127.70, 127.45, 127.38, 127.27, 127.16, 127.11, 126.80, 124.65, 122.85, 122.53, 121.10. HRMS (ESI),  $m/z$  calcd for  $\text{C}_{33}\text{H}_{24}\text{NOS}$  [ $\text{M} + \text{H}$ ] $^+$ : 482.1573; found: 482.1553.

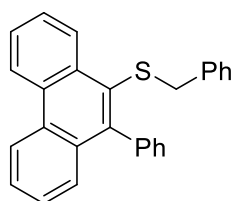

**Benzyl(10-phenylphenanthren-9-yl)sulfane (3ah)** : White crystalline solid (0.143 g, 76%); eluent hexane; mp = 185–187 °C;  $^1\text{H}$  NMR (400 MHz,  $\text{CDCl}_3$ )  $\delta$  8.90 (dd,  $J = 6.2, 3.3$  Hz, 1H), 8.82 – 8.73 (m, 2H), 7.74 (dd,  $J = 6.3, 3.3$  Hz, 2H), 7.68 – 7.63 (m, 1H), 7.42 (d,  $J = 6.9$  Hz, 3H),

7.37 (d,  $J = 8.2$  Hz, 1H), 7.10 (d,  $J = 7.3$  Hz, 3H), 6.97 (dd,  $J = 7.5, 1.7$  Hz, 2H), 6.82 (d,  $J = 6.4$  Hz, 2H), 3.83 (s, 2H).  $^{13}\text{C}$  NMR (100 MHz,  $\text{CDCl}_3$ )  $\delta$  146.22, 140.35, 137.72, 132.22, 132.10, 130.70, 130.60, 130.11, 128.95, 128.53, 128.19, 127.80, 127.40, 127.17, 127.03, 126.84, 126.57, 122.98, 122.45, 40.84. HRMS (ESI),  $m/z$  calcd for  $\text{C}_{27}\text{H}_{20}\text{S}$  [ $\text{M} + \text{H}$ ] $^+$ : 377.1358; found: 377.1285.

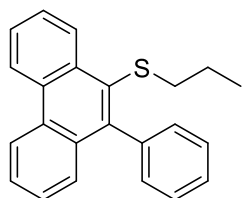

**(10-Phenylphenanthren-9-yl)(propyl)sulfane (3ai)** : White crystalline solid (0.115 g, 70%); eluent hexane; mp = 100–102 °C;  $^1\text{H}$  NMR (400 MHz,  $\text{CDCl}_3$ )  $\delta$  8.97 (d,  $J = 7.6$  Hz, 1H), 8.79 (dd,  $J = 12.8, 8.0$  Hz, 2H), 7.80 – 7.72 (m, 2H), 7.67 (ddd,  $J = 8.3, 5.8, 2.4$  Hz, 1H), 7.60 – 7.49 (m,

5H), 7.40 (dd,  $J = 7.8, 1.3$  Hz, 2H), 2.66 (t,  $J = 7.3$  Hz, 2H), 1.45 (dd,  $J = 14.7, 7.3$  Hz, 2H), 0.84 (t,  $J = 7.3$  Hz, 3H).  $^{13}\text{C}$  NMR (100 MHz,  $\text{CDCl}_3$ )  $\delta$  145.39, 140.64, 132.53, 132.10, 130.65, 130.45, 130.35, 128.32, 127.93, 127.87, 127.20, 127.11, 126.98, 126.74, 126.56, 122.85, 122.41, 38.67, 22.87, 13.41 (Overlapping peaks present). HRMS (ESI),  $m/z$  calcd for  $\text{C}_{23}\text{H}_{21}\text{S}$  [ $\text{M} + \text{H}$ ] $^+$ : 329.1358; found: 329.1292.

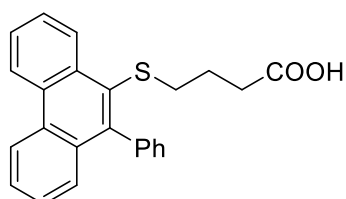

**4-((10-Phenylphenanthren-9-yl)thio)butanoic acid (3aj)** : Yellow crystalline solid (0.104 g, 56%); eluent hexane/EtOAc (20:1); mp = 130–132 °C;  $^1\text{H}$  NMR (400 MHz,  $\text{CDCl}_3$ )  $\delta$  8.90 (dd,  $J = 6.9, 2.6$  Hz, 1H), 8.77 (dd,  $J = 12.4, 7.9$  Hz, 2H), 7.77 –

7.71 (m, 2H), 7.67 (ddd,  $J = 8.3, 5.9, 2.4$  Hz, 1H), 7.56 – 7.48 (m, 5H), 7.37 (dd,  $J = 7.8, 1.5$

Hz, 2H), 2.71 (t,  $J = 6.9$  Hz, 2H), 2.24 (t,  $J = 7.4$  Hz, 2H), 1.72 – 1.65 (m, 2H).  $^{13}\text{C}$  NMR (100 MHz,  $\text{CDCl}_3$ )  $\delta$  179.33, 145.69, 140.38, 132.23, 131.97, 130.71, 130.53, 130.40, 129.42, 128.38, 127.94, 127.69, 127.32, 127.26, 127.15, 126.83, 126.63, 122.94, 122.42, 77.00, 35.54, 32.55, 24.04. HRMS (ESI),  $m/z$  calcd for  $\text{C}_{24}\text{H}_{21}\text{O}_2\text{S}$  [M]: 373.1257; found: 373.1180.

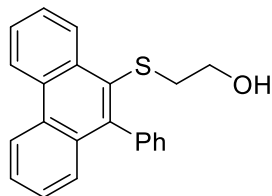

**2-(10-Phenylphenanthren-9-yl)ethan-1-ol (3ak)** : Yellow solid (0.066g, 40%); eluent hexane/EtOAc (25:1); mp = 123–125 °C;  $^1\text{H}$  NMR (400 MHz,  $\text{CDCl}_3$ )  $\delta$  8.84 (dd,  $J = 7.5, 2.1$  Hz, 1H), 8.79 (dd,  $J = 7.5, 2.0$  Hz, 1H), 8.75 (d,  $J = 8.4$  Hz, 1H), 7.77 – 7.71 (m, 2H), 7.67 (ddd,  $J = 8.3, 5.0, 3.3$  Hz, 1H), 7.60 – 7.55 (m, 2H), 7.53 (dd,  $J = 5.1, 3.6$  Hz, 1H), 7.49 – 7.45 (m, 2H), 7.39 – 7.35 (m, 2H), 3.38 (t,  $J = 5.6$  Hz, 2H), 2.87 (t,  $J = 5.6$  Hz, 2H).  $^{13}\text{C}$  NMR (100 MHz,  $\text{CDCl}_3$ )  $\delta$  146.03, 140.35, 131.80, 130.89, 130.63, 130.38, 128.50, 128.28, 127.60, 127.50, 127.37, 126.99, 126.80, 123.13, 122.48, 59.78, 39.77. Anal calcd for  $\text{C}_{22}\text{H}_{18}\text{OS}$ : C, 79.97; H, 5.49; S, 9.70; found C, 79.81; H, 5.61; S, 9.86.

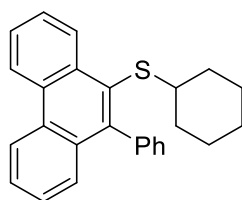

**Cyclohexyl(10-phenylphenanthren-9-yl)sulfane (3al)** :<sup>3</sup> Off White solid (0.074 g, 38%); eluent hexane; mp = 129–131 °C;  $^1\text{H}$  NMR (400 MHz,  $\text{CDCl}_3$ )  $\delta$  8.92 (dd,  $J = 7.2, 2.5$  Hz, 1H), 8.76 (dd,  $J = 10.5, 7.8$  Hz, 2H), 7.72 (ddd,  $J = 4.6, 2.4, 0.6$  Hz, 2H), 7.65 (m, 1H), 7.55 – 7.52 (m, 1H), 7.52 – 7.46 (m, 2H), 7.45 (d,  $J = 3.6$  Hz, 2H), 7.35 (d,  $J = 1.6$  Hz, 1H), 7.33 (d,  $J = 1.4$  Hz, 1H), 2.83 (tt,  $J = 10.7, 3.7$  Hz, 1H), 1.69 (dd,  $J = 13.3, 3.0$  Hz, 2H), 1.51 – 1.45 (m, 1H), 1.33 – 1.18 (m, 4H), 1.09 (ddd,  $J = 16.7, 10.3, 3.1$  Hz, 3H).  $^{13}\text{C}$  NMR (100 MHz,  $\text{CDCl}_3$ )  $\delta$  145.47, 140.62, 133.16, 132.17, 130.69, 130.56, 130.44, 129.85, 128.36, 128.25, 127.78, 127.10, 127.05, 126.94, 126.70, 126.57, 122.77, 122.42, 48.55, 33.46, 26.03, 25.63.

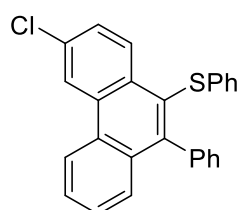

**(6-Chloro-10-phenylphenanthren-9-yl)(phenyl)sulfane (3ba)** : Yellow crystalline solid (0.133 g, 67%); eluent hexane; mp = 155–157 °C;  $^1\text{H}$  NMR (400 MHz,  $\text{CDCl}_3$ )  $\delta$  8.72 (d,  $J = 2.1$  Hz, 1H), 8.69 (d,  $J = 8.4$  Hz, 1H), 8.63 (d,  $J = 8.9$  Hz, 1H), 7.71 (ddd,  $J = 8.3, 6.2, 2.1$  Hz, 1H), 7.51 (dd,  $J = 3.0, 1.6$  Hz, 1H), 7.49 (dd,  $J = 1.9, 1.0$  Hz, 2H), 7.45 (d,  $J = 2.0$  Hz, 2H), 7.44 (d,  $J = 1.8$  Hz, 1H), 7.25 (d,  $J = 2.0$  Hz, 1H), 7.24 – 7.22 (m, 1H), 7.06 (ddd,  $J = 4.9, 3.3, 1.9$  Hz, 3H), 7.04 – 7.01 (m, 2H).  $^{13}\text{C}$  NMR (100 MHz,  $\text{CDCl}_3$ )  $\delta$  147.04, 141.63, 133.87, 133.28, 132.45, 132.36, 131.80, 130.86, 130.09, 129.61, 129.20, 129.03, 128.03, 127.93, 127.72, 127.47, 127.39, 127.14, 125.72, 122.63, 122.32. HRMS (ESI),  $m/z$  calcd for  $\text{C}_{26}\text{H}_{17}\text{ClS}$  [M]: 396.0739; found: 396.0717.

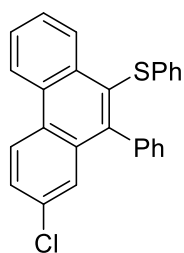

**(2-Chloro-10-phenylphenanthren-9-yl)(phenyl)sulfane (3ca):**<sup>3</sup> White crystalline solid (0.129 g, 62%); eluent hexane; mp = 145–147 °C; <sup>1</sup>H NMR (400 MHz, CDCl<sub>3</sub>) δ 8.66 – 8.72 (m, 3H), 7.60 – 7.73 (m, 1H), 7.67 – 7.59 (m, 2H), 7.52 – 7.43 (m, 4H), 7.28 (d, *J* = 2.2 Hz, 2H), 7.15 – 7.07 (m, 2H), 7.07 – 7.01 (m, 1H), 6.99 – 6.89 (m, 2H). <sup>13</sup>C NMR (100 MHz, CDCl<sub>3</sub>) δ 145.69, 139.37, 138.60, 133.31, 132.76, 131.96, 130.36, 129.44, 128.87, 128.70, 128.20, 128.15, 128.00, 127.83, 127.67, 127.61, 127.42, 126.49, 124.85, 124.24, 122.68.

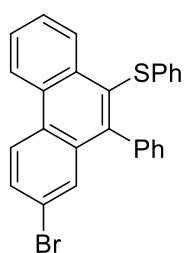

**(2-Bromo-10-phenylphenanthren-9-yl)(phenyl)sulfane (3da)** : White solid (0.155 g, 67%); eluent hexane; mp = 166–168 °C; <sup>1</sup>H NMR (400 MHz, CDCl<sub>3</sub>) δ 8.71 (d, *J* = 8.1 Hz, 1H), 8.69 – 8.59 (m, 2H), 7.78 (dd, *J* = 8.9, 2.1 Hz, 1H), 7.73 – 7.67 (m, 1H), 7.67 – 7.57 (m, 2H), 7.46 (dd, *J* = 5.0, 1.7 Hz, 3H), 7.24 (dd, *J* = 5.4, 2.1 Hz, 2H), 7.13 – 7.06 (m, 2H), 7.06 – 6.99 (m, 1H), 6.92 (dd, *J* = 5.3, 3.3 Hz, 2H). <sup>13</sup>C NMR (100 MHz, CDCl<sub>3</sub>) δ 145.63, 139.34, 138.61, 133.68, 132.02, 130.76, 130.70, 130.41, 129.74, 129.46, 128.88, 128.71, 128.23, 128.16, 127.94, 127.70, 127.44, 126.51, 126.37, 124.86, 124.38, 122.64, 121.06. Anal calcd for C<sub>26</sub>H<sub>17</sub>BrS: C, 70.75; H, 3.88; S, 7.26 found C, 70.96; H, 3.61; S, 7.10.

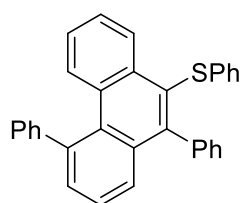

**(4,10-Diphenylphenanthren-9-yl)(phenyl)sulfane (3ea)** : White crystalline solid (0.154 g, 70%); eluent hexane; mp = 200–202 °C; <sup>1</sup>H NMR (400 MHz, CDCl<sub>3</sub>) δ 8.63 (d, *J* = 8.2 Hz, 1H), 7.88 (d, *J* = 8.5 Hz, 1H), 7.48 (d, *J* = 14.7 Hz, 12H), 7.31 (d, *J* = 3.0 Hz, 2H), 7.12 (dd, *J* = 11.6, 7.3 Hz, 3H), 7.00 (dd, *J* = 31.2, 7.3 Hz, 3H). <sup>13</sup>C NMR (100 MHz, CDCl<sub>3</sub>) δ 146.71, 145.25, 140.62, 140.23, 138.90, 133.74, 133.06, 131.89, 130.89, 129.60, 129.09, 129.03, 128.89, 128.66, 128.28, 128.00, 127.77, 127.47, 127.35, 127.12, 126.94, 126.53, 125.68, 124.97, 124.71. Anal calcd for C<sub>32</sub>H<sub>22</sub>S: C, 87.63; H, 5.06; S, 7.31; found C, 87.76; H, 5.18; S, 7.18.

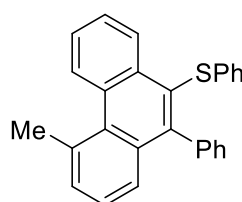

**(4-Methyl-10-phenylphenanthren-9-yl)(phenyl)sulfane (3fa)** : Yellow solid (0.135 g, 72%); eluent hexane; mp = 188–190 °C; <sup>1</sup>H NMR (400 MHz, CDCl<sub>3</sub>) δ 8.92 (d, *J* = 8.2 Hz, 1H), 8.77 (dd, *J* = 8.2, 1.4 Hz, 1H), 7.69 (ddd, *J* = 8.5, 7.0, 1.6 Hz, 1H), 7.65 – 7.59 (m, 2H), 7.46 (dd, *J*

= 4.1, 2.4 Hz, 3H), 7.44 – 7.38 (m, 2H), 7.31 – 7.27 (m, 2H), 7.14 – 7.09 (m, 2H), 7.06 – 7.02 (m, 1H), 6.98 (d,  $J = 1.4$  Hz, 1H), 6.96 (s, 1H), 3.23 (s, 3H).  $^{13}\text{C}$  NMR (100 MHz,  $\text{CDCl}_3$ )  $\delta$  147.23, 140.88, 138.94, 134.98, 133.71, 132.94, 132.23, 132.03, 131.33, 129.50, 128.62, 127.92, 127.71, 127.23, 127.11, 126.84, 126.39, 125.75, 125.64, 124.61, 27.29. HRMS (ESI)  $m/z$  calcd for  $\text{C}_{27}\text{H}_{21}\text{S}$   $[\text{M} + \text{H}]^+$ : 377.1358; found: 377.1286.

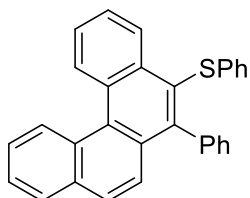

**Phenyl(6-phenylbenzo[*c*]phenanthren-5-yl)sulfane (3ga)** : Yellow solid (0.083 g, 38%); eluent hexane; mp = 145–147 °C;  $^1\text{H}$  NMR (400 MHz,  $\text{CDCl}_3$ )  $\delta$  9.15 (d,  $J = 8.0$  Hz, 2H), 8.83 (dd,  $J = 8.3, 1.0$  Hz, 1H), 8.03 (d,  $J = 7.7$  Hz, 1H), 7.80 – 7.67 (m, 5H), 7.49 (dd,  $J = 5.5, 3.4$  Hz, 4H), 7.37 – 7.29 (m, 2H), 7.12 (dd,  $J = 11.4, 4.3$  Hz, 2H), 7.05 (d,  $J = 7.1$  Hz, 1H), 7.00 – 6.94 (m, 2H).  $^{13}\text{C}$  NMR (100 MHz,  $\text{CDCl}_3$ )  $\delta$  146.03, 140.21, 138.98, 133.52, 133.31, 130.64, 130.40, 129.84, 129.53, 129.15, 128.83, 128.65, 128.58, 128.21, 127.95, 127.46, 127.40, 127.12, 127.04, 126.64, 126.25, 126.22, 125.47, 124.74. HRMS (ESI),  $m/z$  calcd for  $\text{C}_{30}\text{H}_{21}\text{S}$   $[\text{M} + \text{H}]^+$ : 413.1358; found: 413.1327.

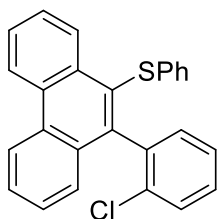

**(10-(2-Chlorophenyl)phenanthren-9-yl)(phenyl)sulfane (3ha)** : White crystalline solid (0.188g, 95%); eluent hexane; mp = 130–132 °C;  $^1\text{H}$  NMR (400 MHz,  $\text{CDCl}_3$ )  $\delta$  8.74 (d,  $J = 2.0$  Hz, 1H), 8.69 (d,  $J = 8.4$  Hz, 1H), 8.58 (d,  $J = 8.9$  Hz, 1H), 7.72 (ddd,  $J = 8.3, 5.2, 3.1$  Hz, 1H), 7.55 – 7.51 (m, 3H), 7.45 (dd,  $J = 4.9, 1.7$  Hz, 3H), 7.30 – 7.26 (m, 2H), 7.14 – 7.09 (m, 2H), 7.04 (ddd,  $J = 7.3, 3.6, 1.2$  Hz, 1H), 6.94 – 6.90 (m, 2H).  $^{13}\text{C}$  NMR (100 MHz,  $\text{CDCl}_3$ )  $\delta$  147.03, 139.80, 138.57, 133.31, 132.59, 132.05, 130.47, 130.08, 129.78, 129.45, 128.82, 128.75, 128.01, 127.97, 127.89, 127.50, 127.37, 126.80, 126.40, 124.89, 122.63, 122.42. Anal calcd for  $\text{C}_{26}\text{H}_{17}\text{ClS}$ : C, 78.67; H, 4.32; S, 8.08; found C, 78.56; H, 4.48; S, 8.21.

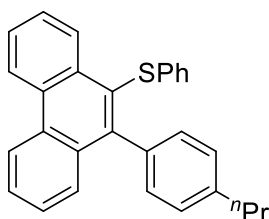

**Phenyl(10-(4-propylphenyl)phenanthren-9-yl)sulfane (3ia)** : Off White crystalline solid (0.142 g, 70%); eluent hexane; mp = 150–152 °C;  $^1\text{H}$  NMR (400 MHz,  $\text{CDCl}_3$ )  $\delta$  8.81 (dd,  $J = 8.2, 3.4$  Hz, 2H), 8.67 (dd,  $J = 8.3, 1.0$  Hz, 1H), 7.72 (dtd,  $J = 8.3, 6.7, 1.5$  Hz, 2H), 7.62 (ddd,  $J = 8.2, 7.0, 1.2$  Hz, 1H), 7.57 (dd,  $J = 8.3, 1.2$  Hz, 1H), 7.54 – 7.50 (m, 1H), 7.28 (s, 1H), 7.20 (d,  $J = 8.1$  Hz, 2H), 7.14 – 7.08 (m, 2H), 7.06 – 7.01 (m, 1H), 6.99 – 6.94 (m, 2H), 2.75 – 2.70 (m, 2H), 1.78 (dd,  $J = 15.1, 7.5$  Hz, 2H), 1.06 (t,  $J = 7.3$  Hz, 3H).  $^{13}\text{C}$



**NMR (100 MHz, CDCl<sub>3</sub>)**  $\delta$  146.96, 141.68, 139.11, 137.36, 132.44, 132.12, 131.09, 130.86, 129.35, 128.82, 128.61, 128.06, 127.99, 127.55, 127.52, 127.24, 126.95, 126.67, 126.49, 124.62, 122.73, 122.52, 37.91, 24.40, 13.96. Anal calcd for C<sub>29</sub>H<sub>24</sub>S: C, 86.10; H, 5.98; S, 7.92; found C, 86.46; H, 5.66; S, 7.82.

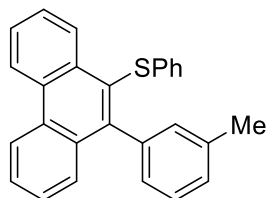

**Phenyl(10-(m-tolyl)phenanthren-9-yl)sulfane (3ja)** : Yellow crystalline solid (0.132 g, 65%); eluent hexane; mp = 165–167 °C; **<sup>1</sup>H NMR (400 MHz, CDCl<sub>3</sub>)**  $\delta$  8.81 – 8.78 (m, 2H), 8.67 (dd, *J* = 8.3, 1.0 Hz, 1H), 7.68 – 7.74 (m, 2H), 7.59 – 7.63 (m, 1H), 7.55 – 7.49 (m, 2H), 7.32 – 7.36 (m, 1H), 7.26 – 7.25 (m, 1H), 7.12 – 7.08 (m, 3H), 7.04 (dd, *J* = 9.6, 4.0 Hz, 2H), 6.97 – 6.93 (m, 2H), 2.36 (s, 3H). **<sup>13</sup>C NMR (100 MHz, CDCl<sub>3</sub>)**  $\delta$  146.93, 140.05, 139.11, 137.39, 132.28, 132.15, 131.05, 130.83, 130.26, 128.76, 128.58, 128.07, 128.03, 127.81, 127.53, 127.15, 126.96, 126.66, 126.53, 124.65, 122.72, 122.51, 21.48. HRMS (ESI) *m/z* calcd for C<sub>27</sub>H<sub>21</sub>S [*M* + *H*]<sup>+</sup>: 377.1358; found: 377.1324.

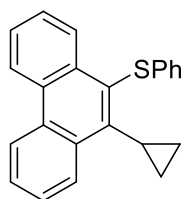

**(10-Cyclopropylphenanthren-9-yl)(phenyl)sulfane (3ka)** : Yellow liquid (0.083 g, 51%); eluent hexane; **<sup>1</sup>H NMR (400 MHz, CDCl<sub>3</sub>)**  $\delta$  7.47 – 7.42 (m, 2H), 7.40 – 7.34 (m, 3H), 7.32 – 7.27 (m, 2H), 7.25 – 7.23 (m, 1H), 7.21 – 7.14 (m, 2H), 7.13 – 7.08 (m, 1H), 6.94 (dd, *J* = 8.3, 1.2 Hz, 2H), 1.85 (tt, *J* = 8.2, 5.2 Hz, 1H), 0.76 – 0.64 (m, 2H), 0.64 – 0.56 (m, 1H), 0.44 – 0.32 (m, 1H). **<sup>13</sup>C NMR (100 MHz, CDCl<sub>3</sub>)**  $\delta$  142.56, 140.88, 140.51, 138.79, 136.39, 130.03, 129.37, 128.95, 128.55, 128.35, 127.79, 127.11, 127.00, 125.53, 107.14, 22.63, 9.54, 8.62. Anal calcd for C<sub>26</sub>H<sub>17</sub>ClS: C, 84.62; H, 5.56; S, 9.82; found C, 84.71; H, 5.36; S, 9.92.

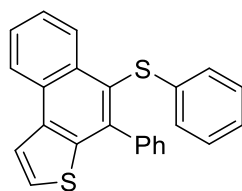

**4-Phenyl-5-(phenylthio)naphtho[2,1-b]thiophene (3la)** : Yellow solid (0.103 g, 56%); eluent hexane; mp = 80–82 °C; **<sup>1</sup>H NMR (400 MHz, CDCl<sub>3</sub>)**  $\delta$  8.68 (d, *J* = 8.4 Hz, 1H), 8.47 – 8.38 (m, 1H), 8.09 (d, *J* = 5.5 Hz, 1H), 7.73 – 7.64 (m, 2H), 7.58 (ddd, *J* = 8.1, 7.1, 1.2 Hz, 1H), 7.52 – 7.38 (m, 5H), 7.14 – 7.08 (m, 2H), 7.07 – 7.01 (m, 1H), 6.95 (dd, *J* = 7.2, 1.3 Hz, 2H). **<sup>13</sup>C NMR (100 MHz, CDCl<sub>3</sub>)**  $\delta$  142.35, 140.14, 139.92, 139.21, 137.14, 132.50, 129.45, 128.96, 128.76, 128.66, 128.15, 128.00, 126.74, 126.60, 126.31, 124.70, 123.98, 123.73, 122.35. HRMS (ESI) *m/z* calcd for C<sub>24</sub>H<sub>17</sub>S<sub>2</sub> [*M*]: 369.0766; found: 369.0732.

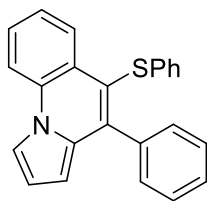

**4-Phenyl-5-(phenylthio)pyrrolo[1,2-a]quinoline (3ma)** : Yellow solid (0.127 g, 66%); eluent hexane; mp = 56–58 °C;  $^1\text{H NMR}$  (400 MHz,  $\text{CDCl}_3$ )  $\delta$  8.18 – 8.12 (m, 1H), 7.58 (s, 1H), 7.51 – 7.49 (m, 1H), 7.48 (t,  $J$  = 2.4 Hz, 2H), 7.47 (d,  $J$  = 2.4 Hz, 1H), 7.44 (dd,  $J$  = 4.9, 3.6 Hz, 2H), 7.36 – 7.27 (m, 6H), 7.14 (s, 1H), 6.95 – 6.89 (m, 1H).  $^{13}\text{C NMR}$  (100 MHz,  $\text{CDCl}_3$ )  $\delta$  140.34, 138.89, 137.34, 136.09, 136.00, 130.24, 130.06, 129.96, 128.80, 128.65, 128.53, 127.74, 126.51, 126.27, 126.16, 125.95, 123.92, 119.98, 101.10, 100.77. Anal calcd for  $\text{C}_{24}\text{H}_{17}\text{NS}$ : C, 82.02; H, 4.88; N, 3.99; S, 9.12; found C, 82.26; H, 4.36; N, 4.07; S, 9.31.

### 13. References:

- 1 N. Mukherjee and T. Chatterjee, *J. Org. Chem.*, 2021, **86**, 7881–7890.
- 2 S. K. Shukla, J. Singh V. Rustogi and A. K. Verma, *J. Org. Chem.*, 2011, **76**, 5670–5684
- 3 B. L. Hu, S. S. Pi, P. C. Qian, J. H. Li and X. G. Zhang, *J. Org. Chem.*, 2013, **78**, 1300–1305.

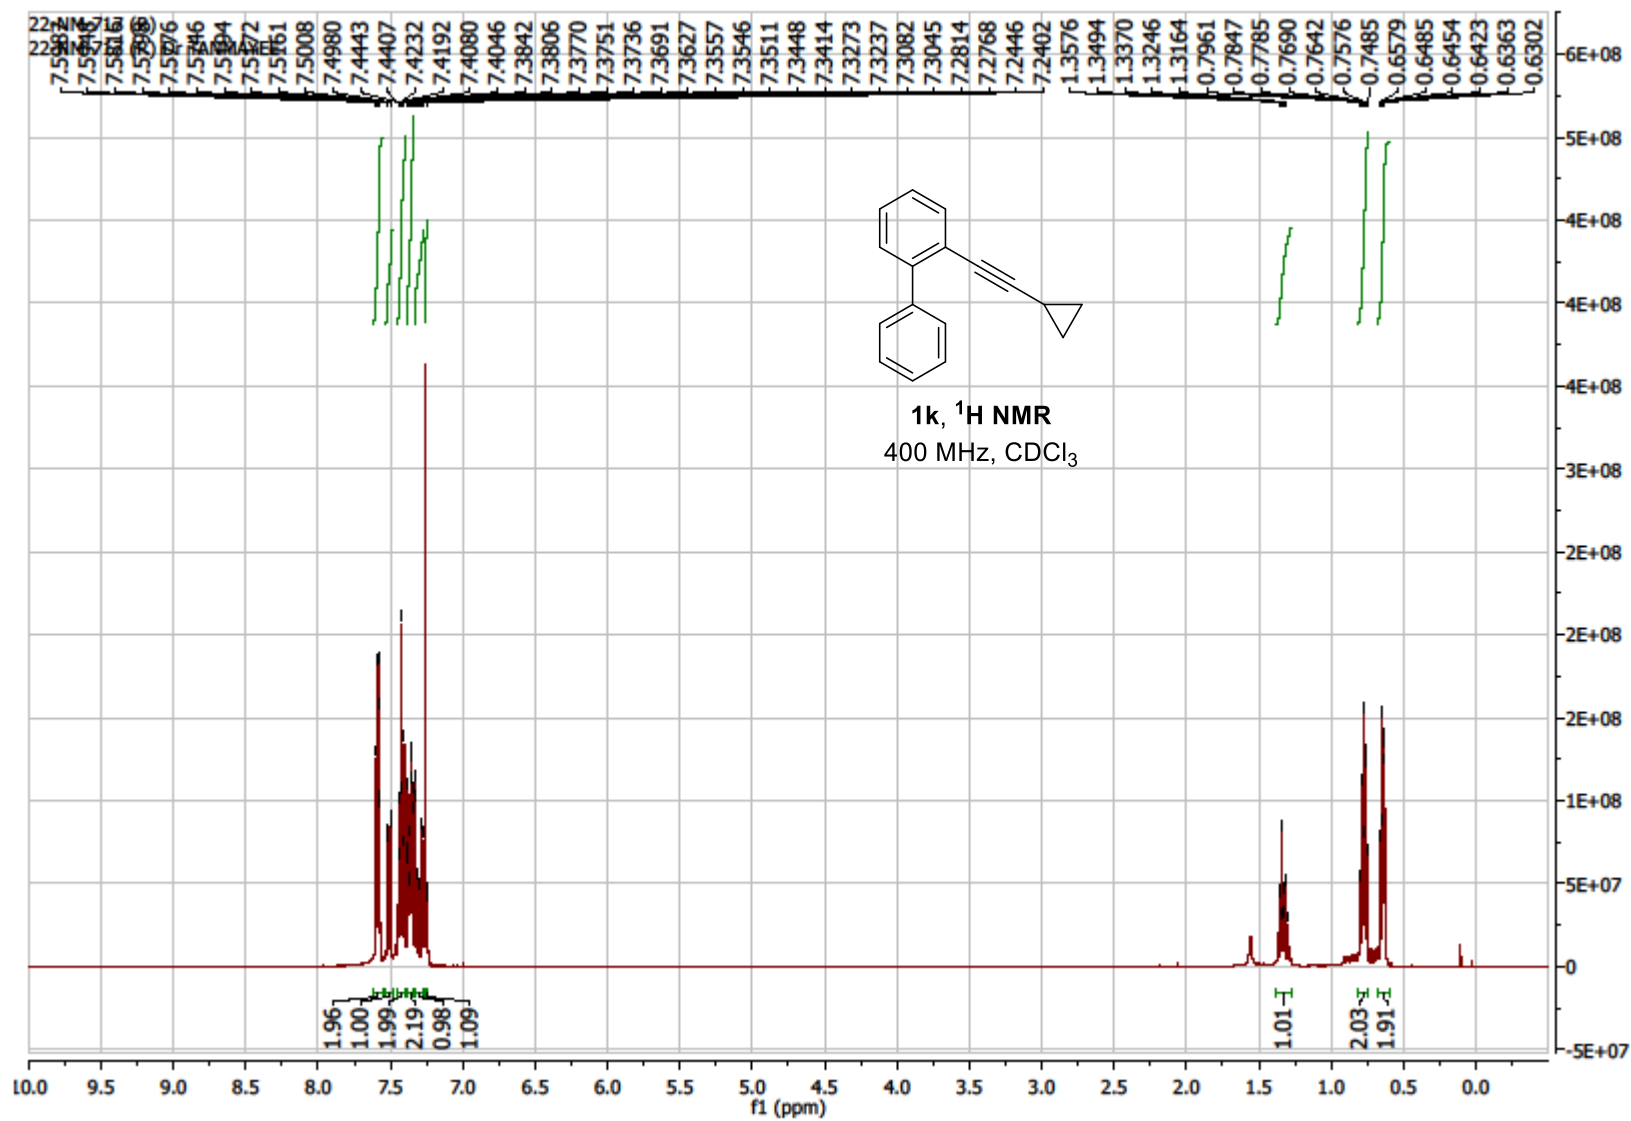

22-NM-717(R) 13C  
22-NM-717(R) 13C Dr TANMAYEE

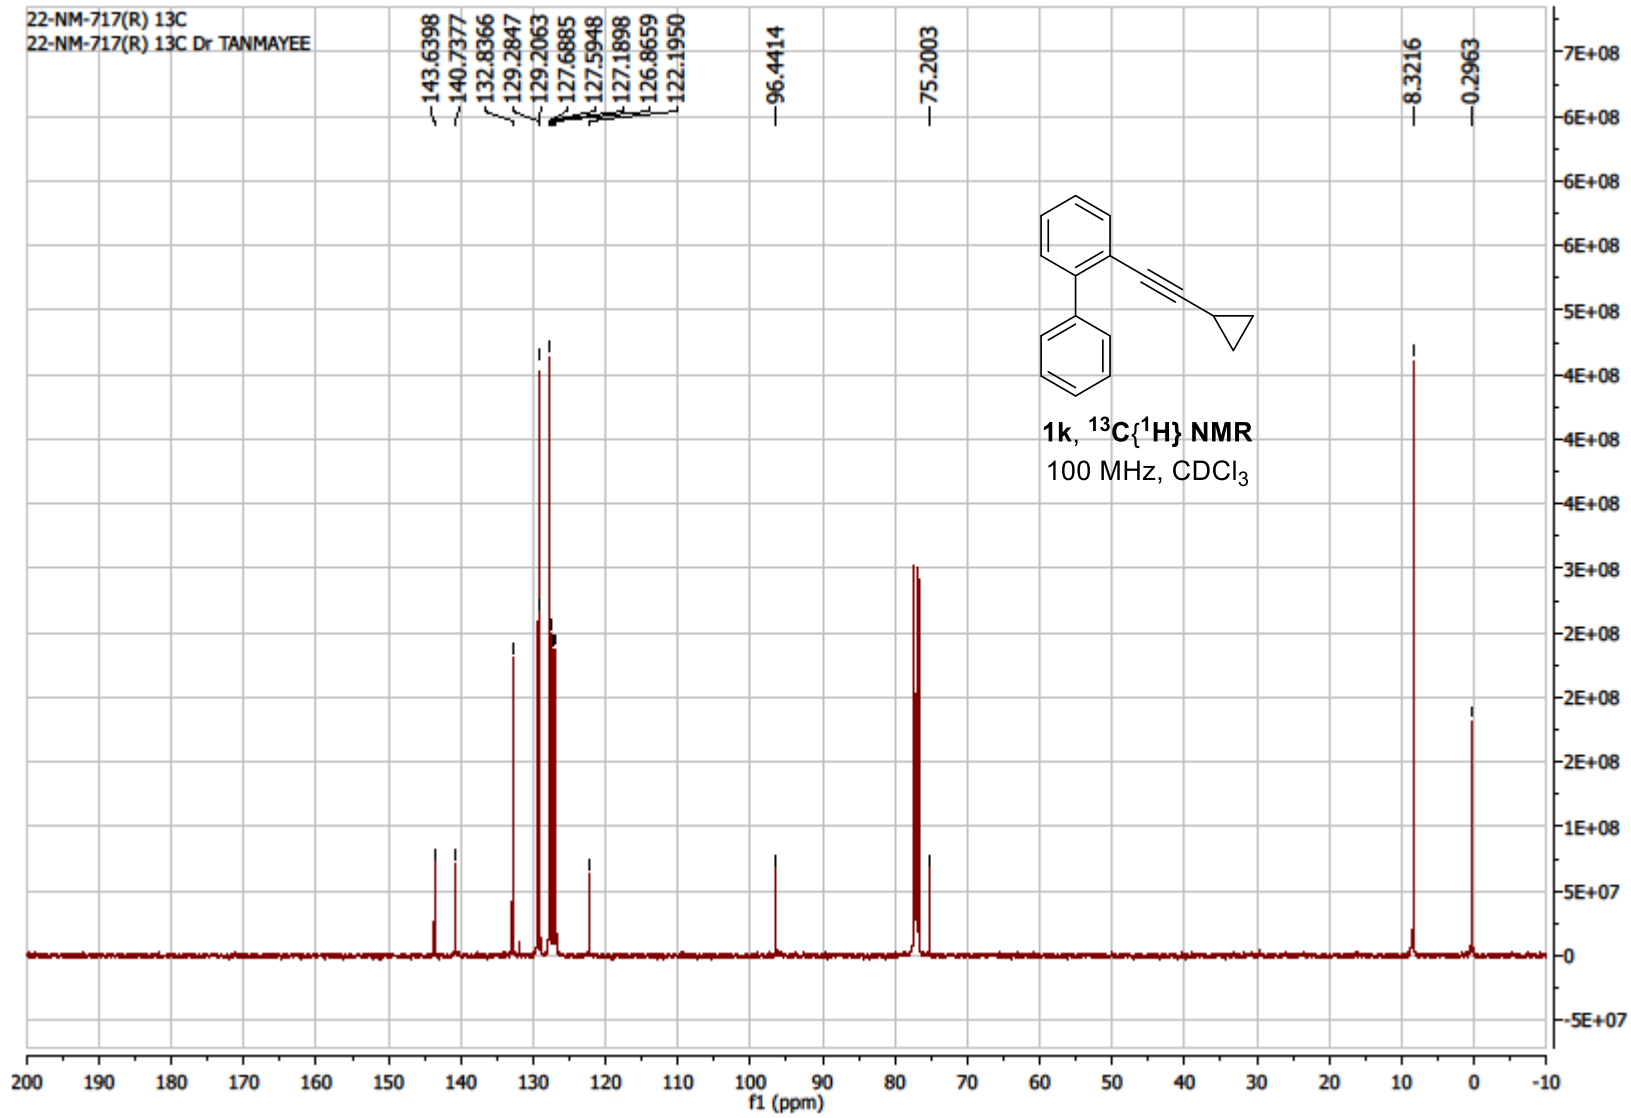

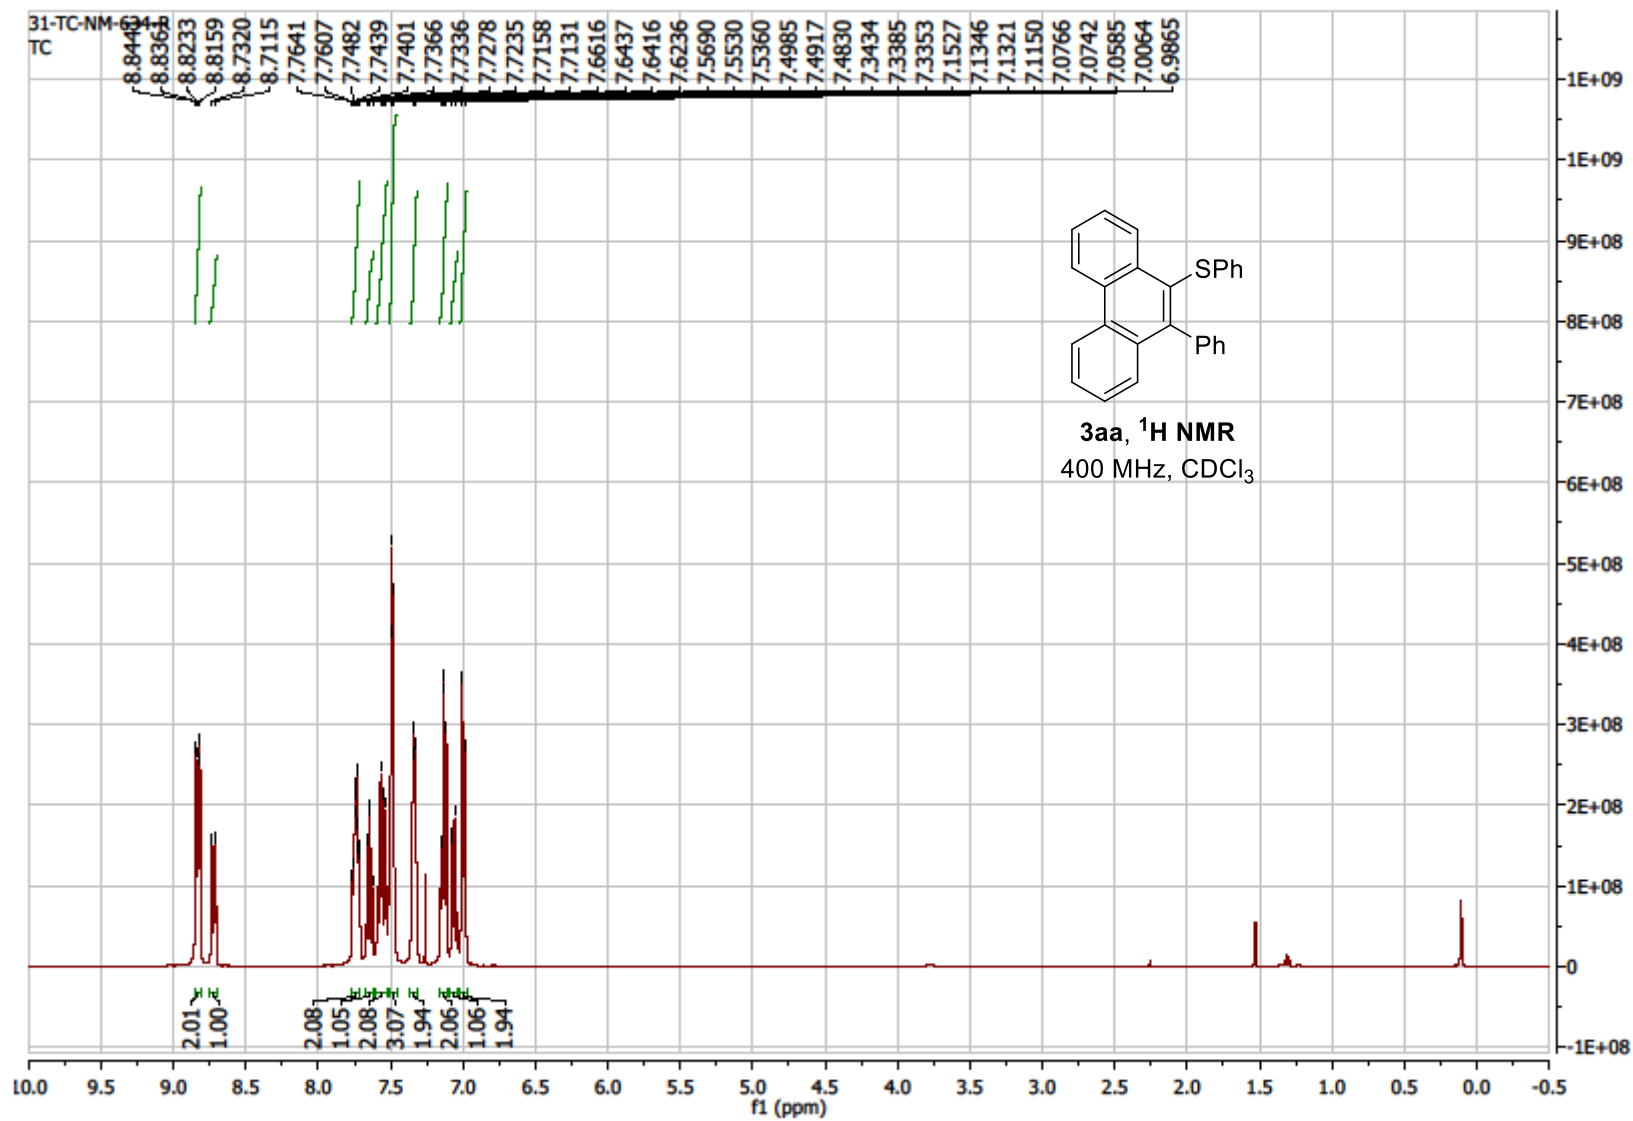

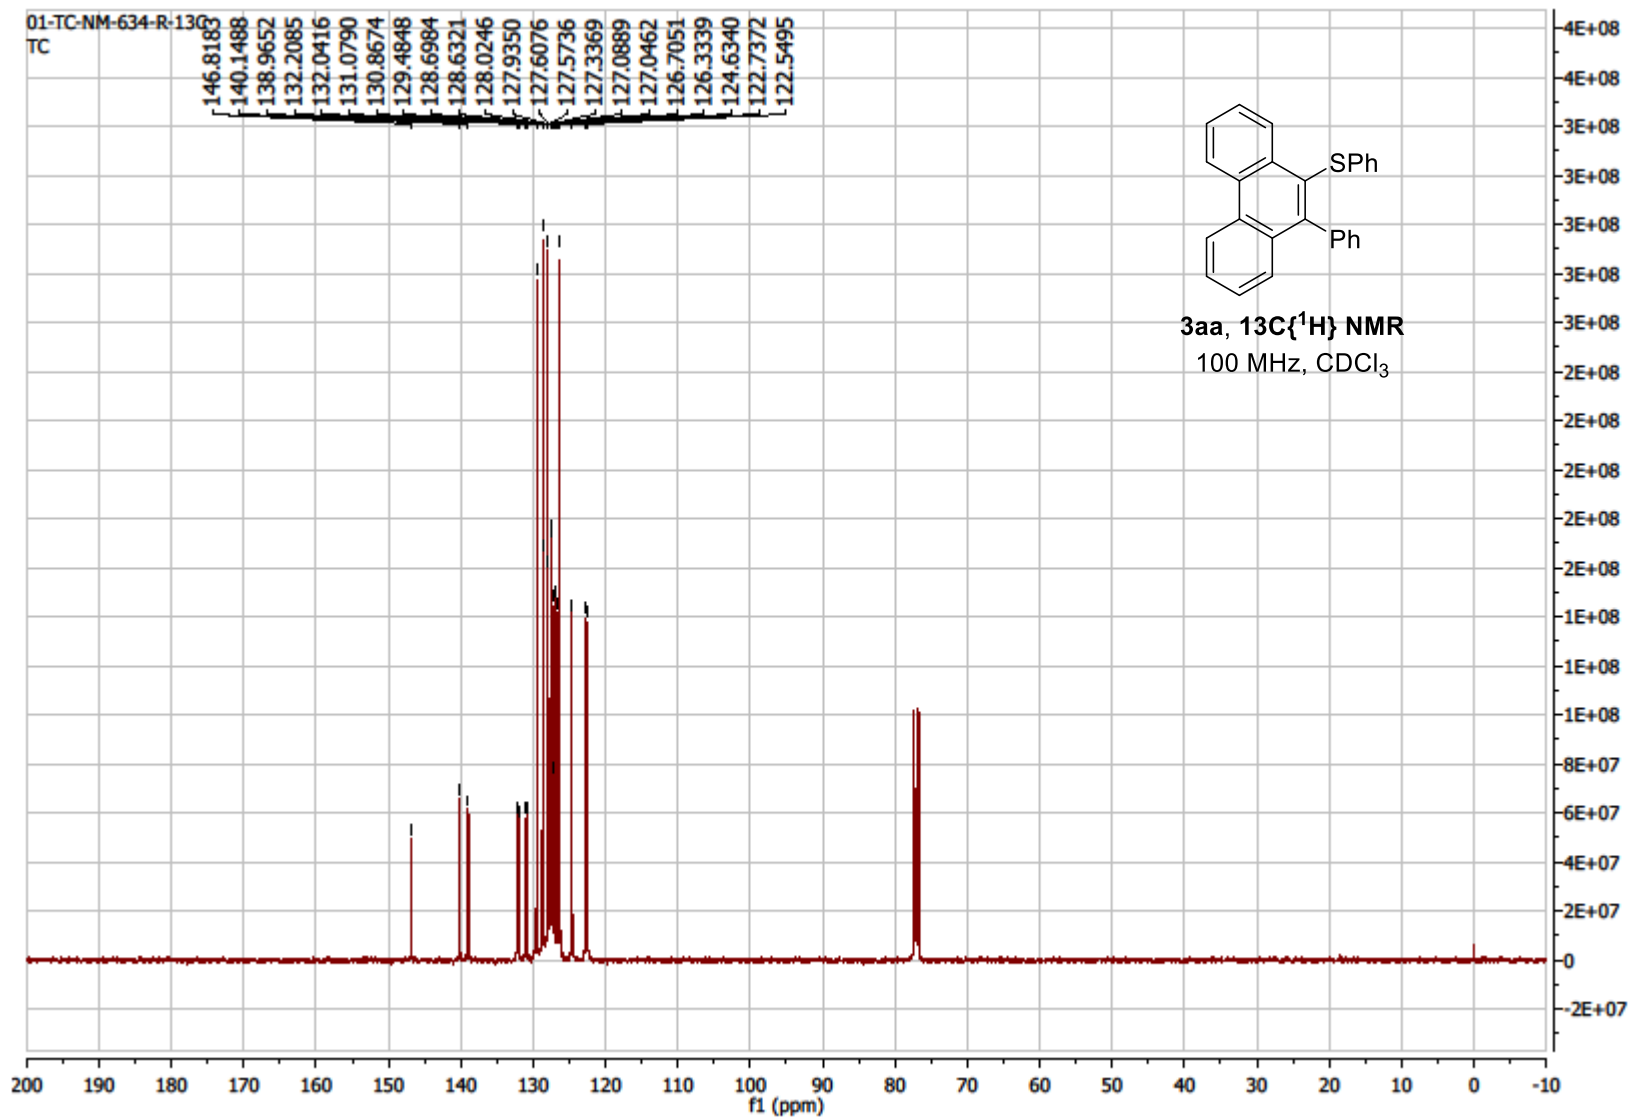

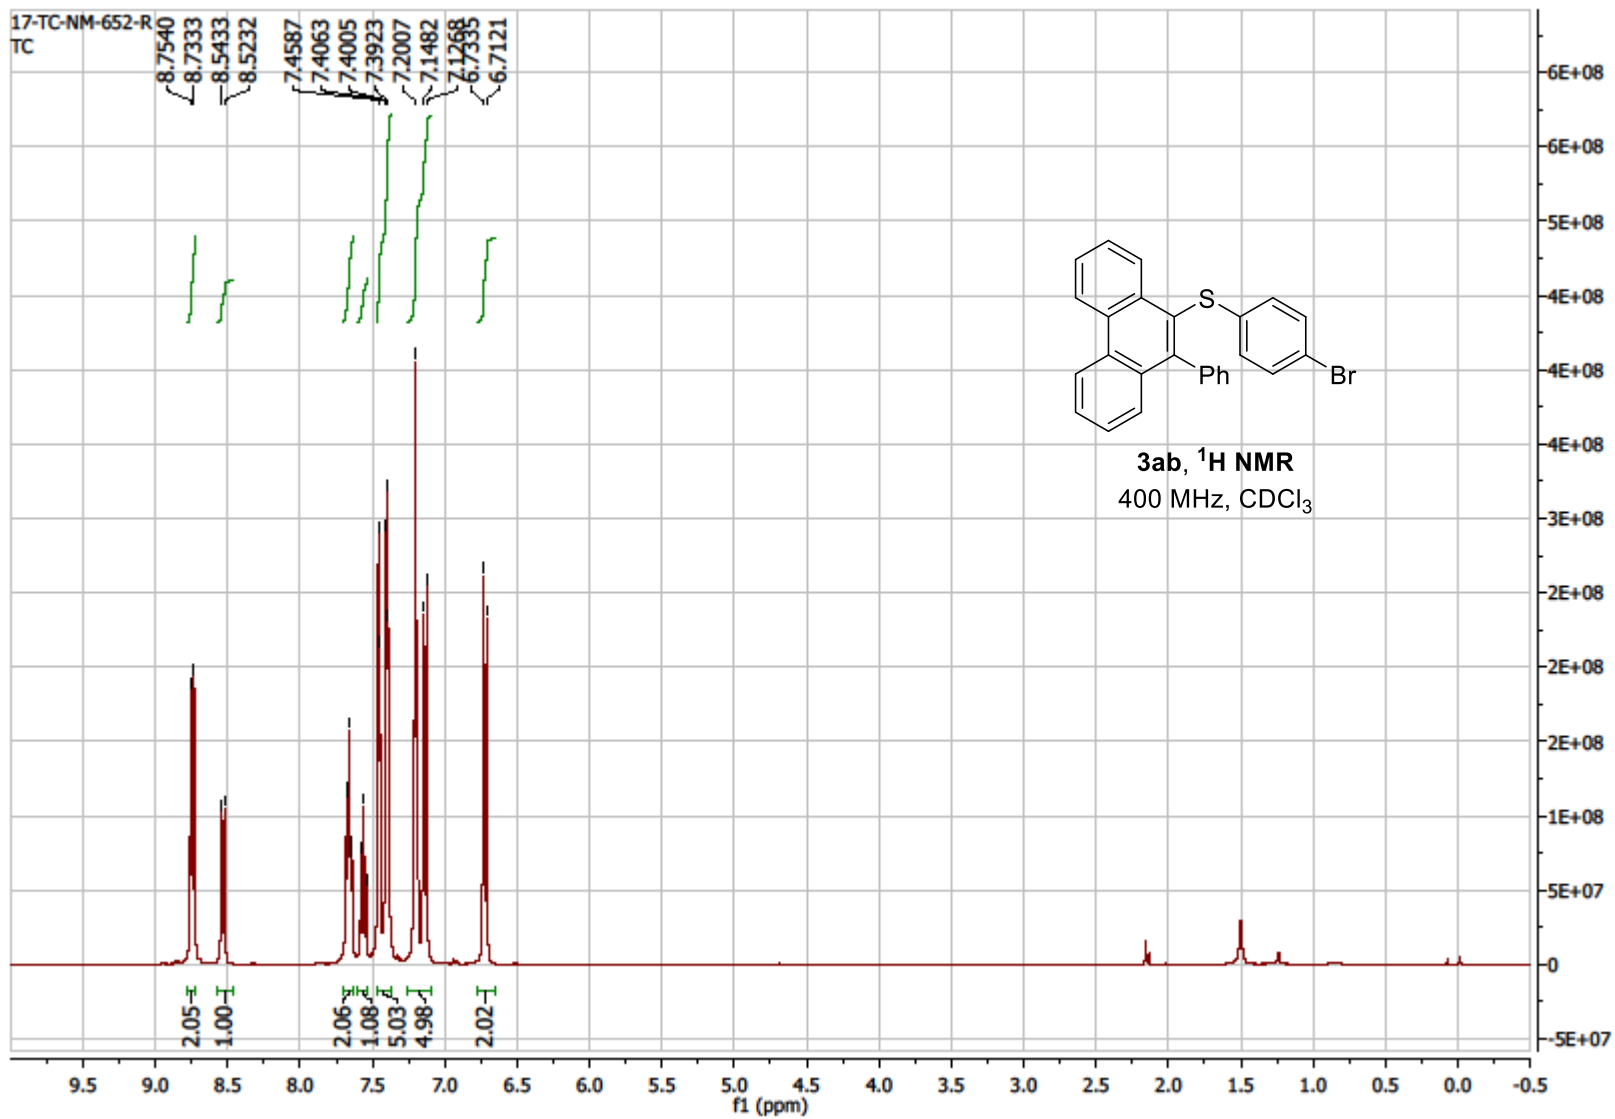

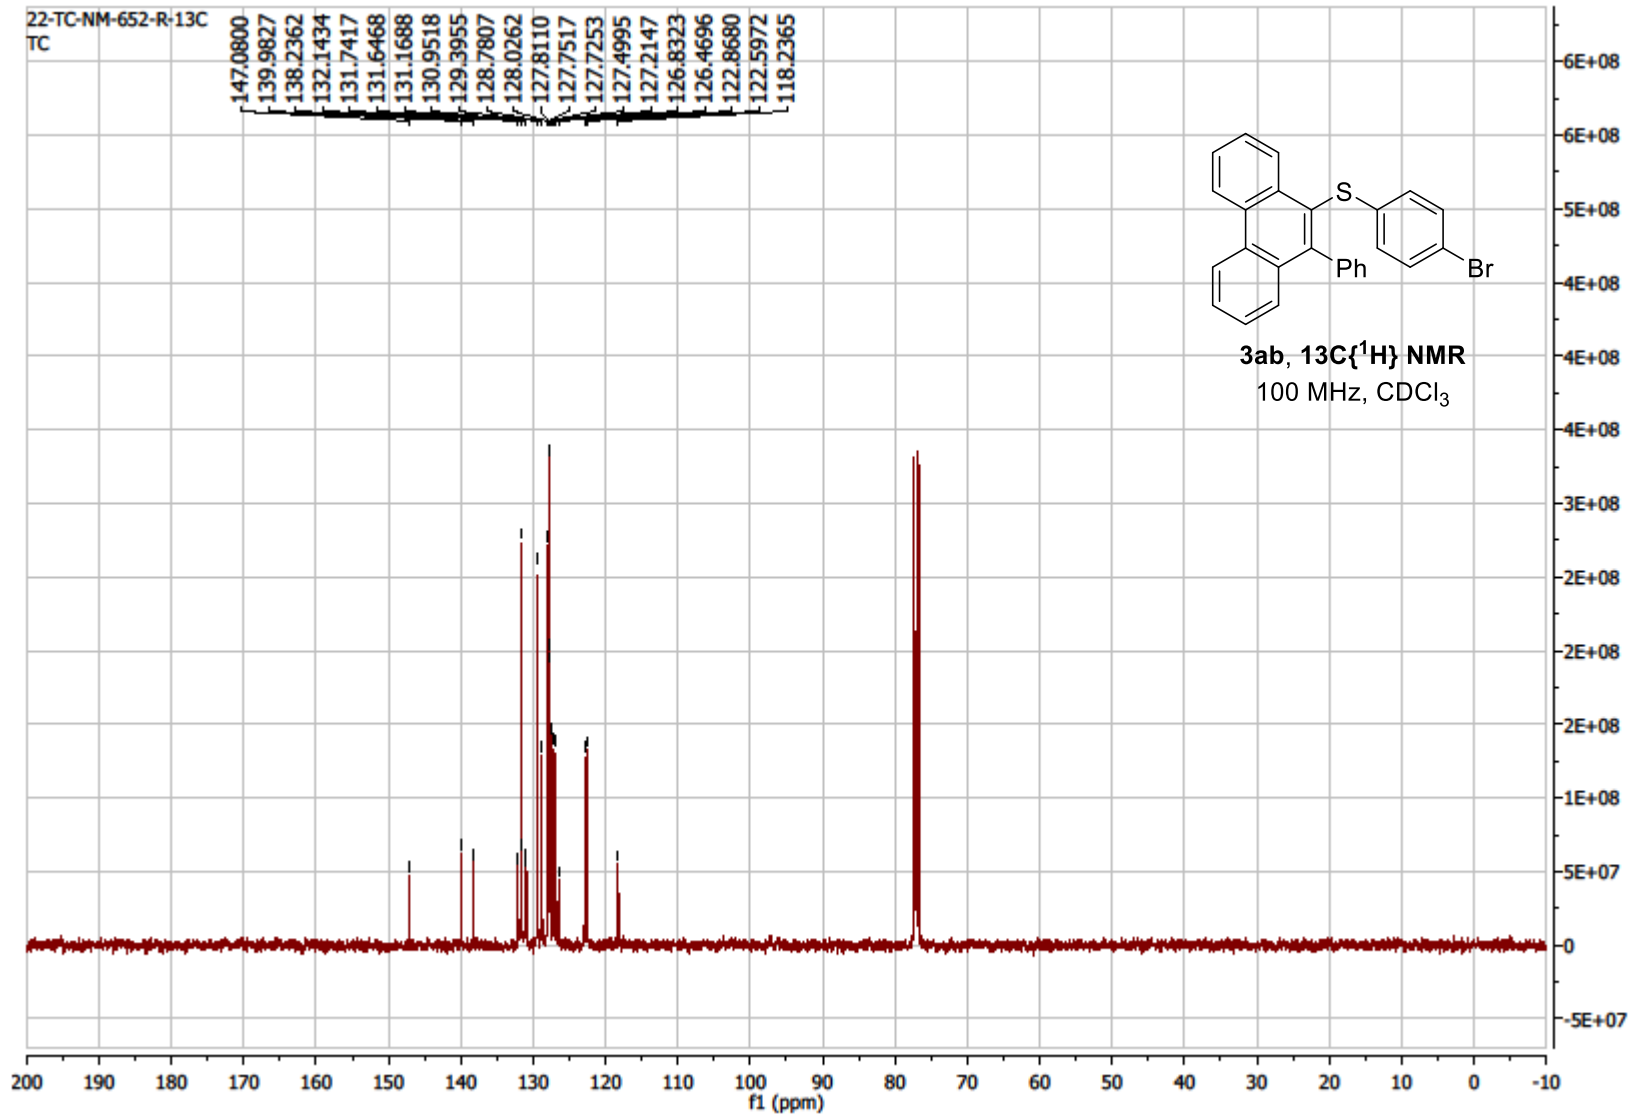



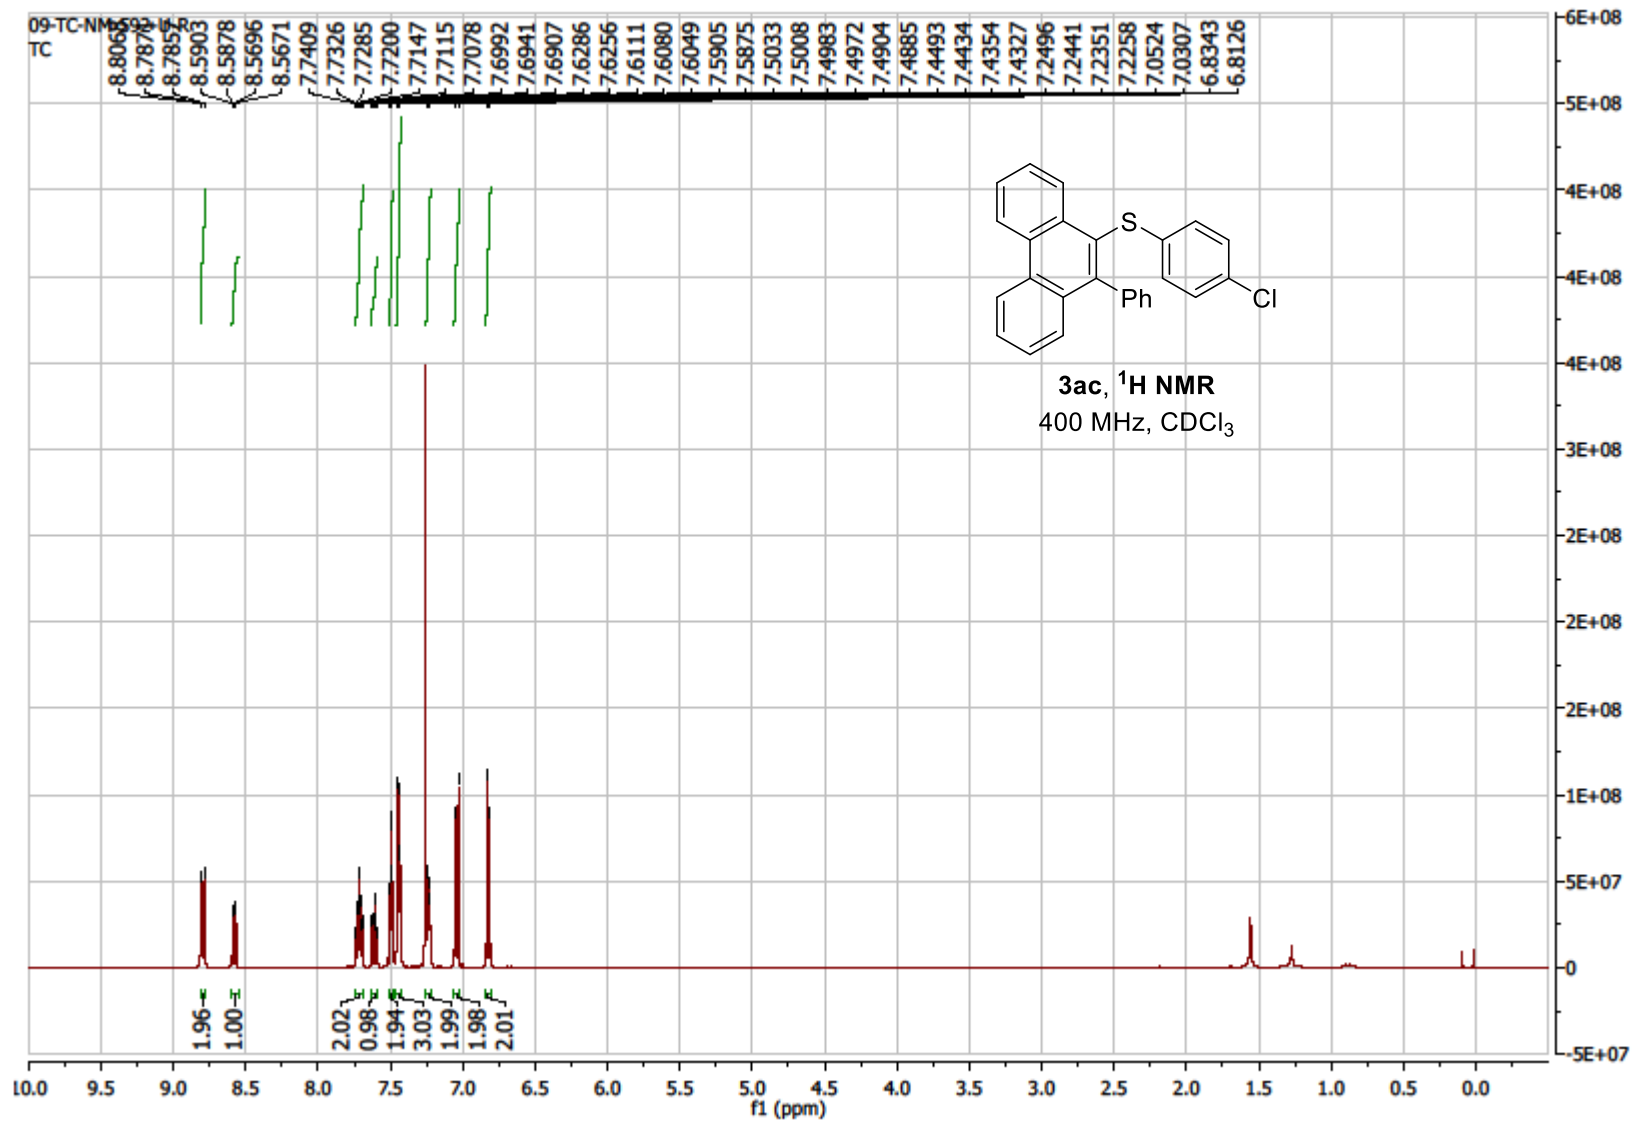

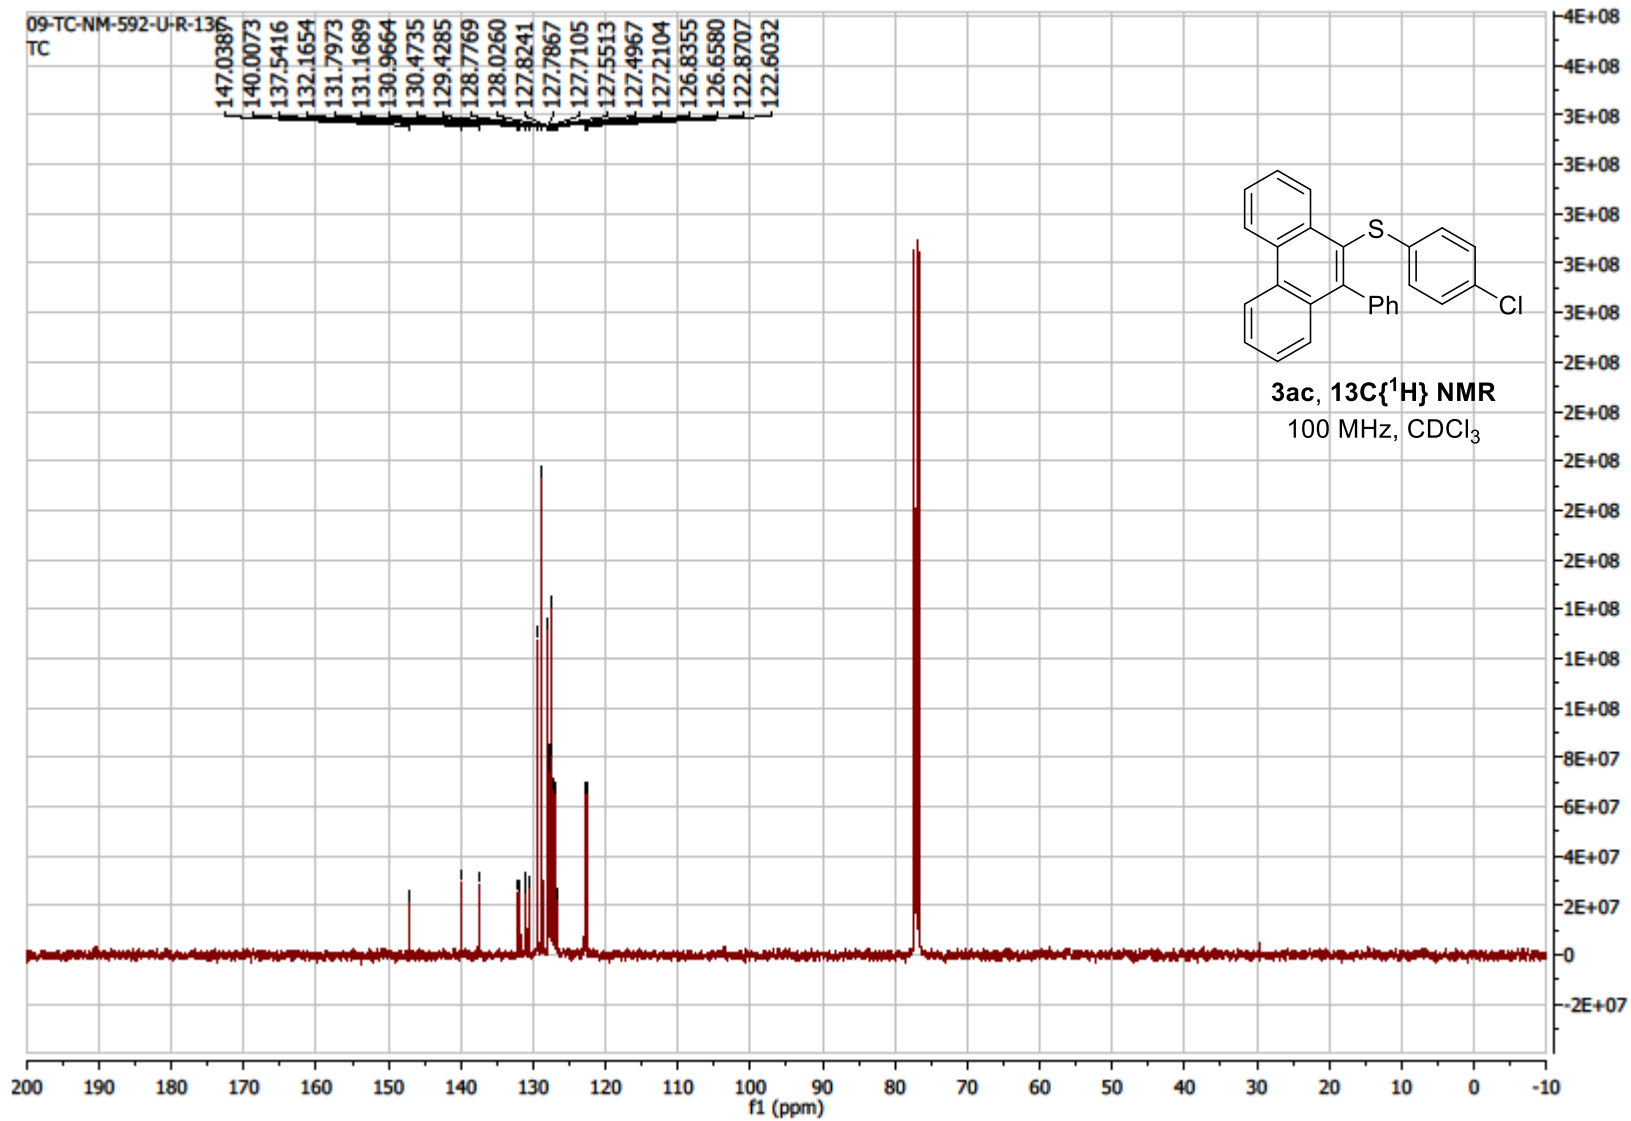

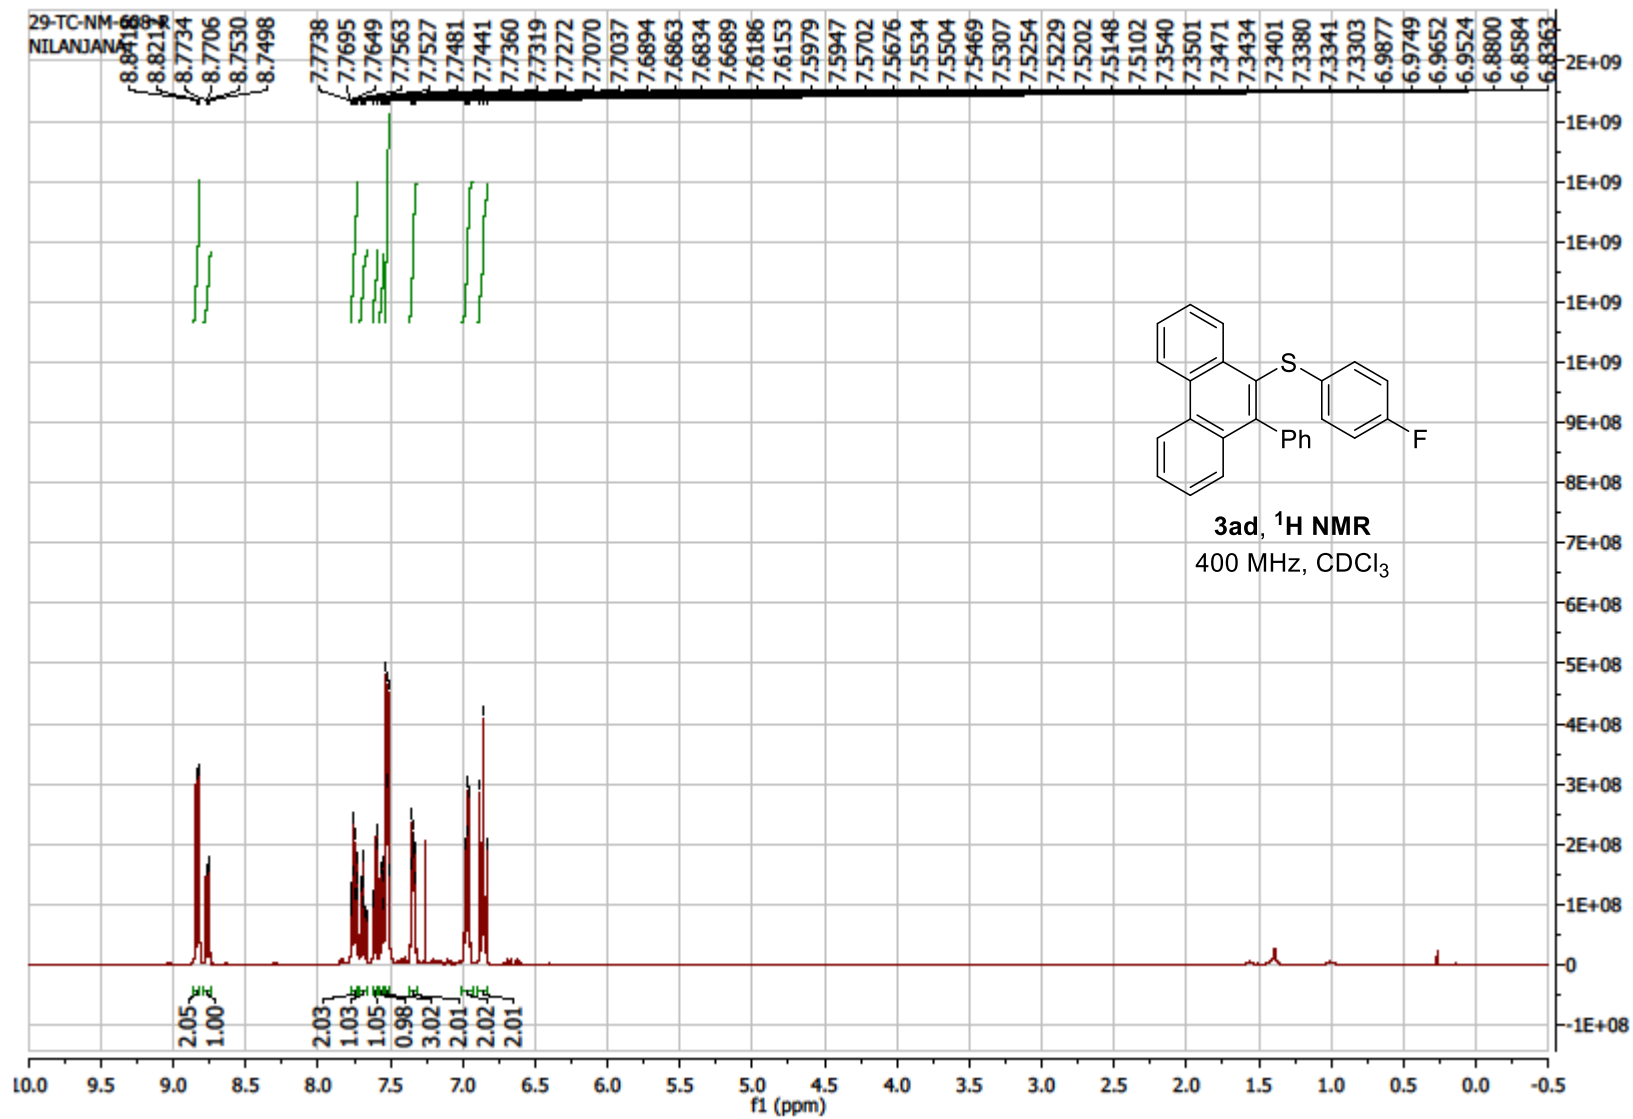

29-TC-NM-608-R-13C  
NILANJANA

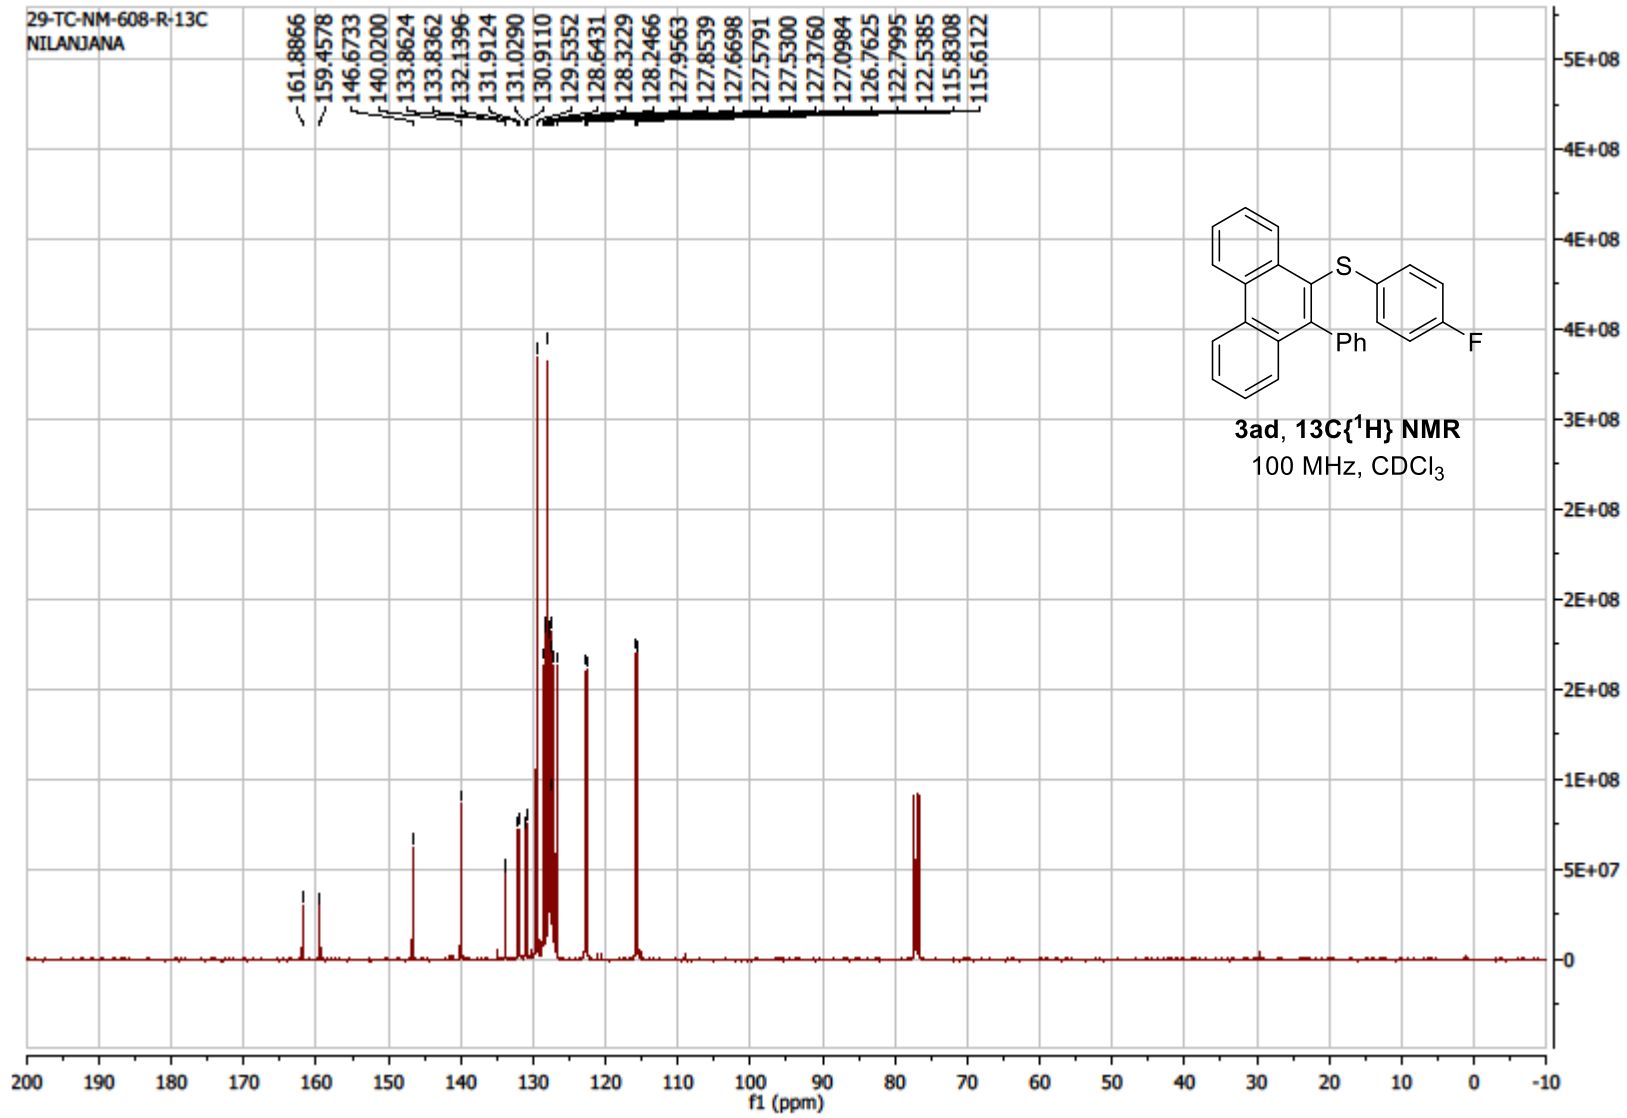

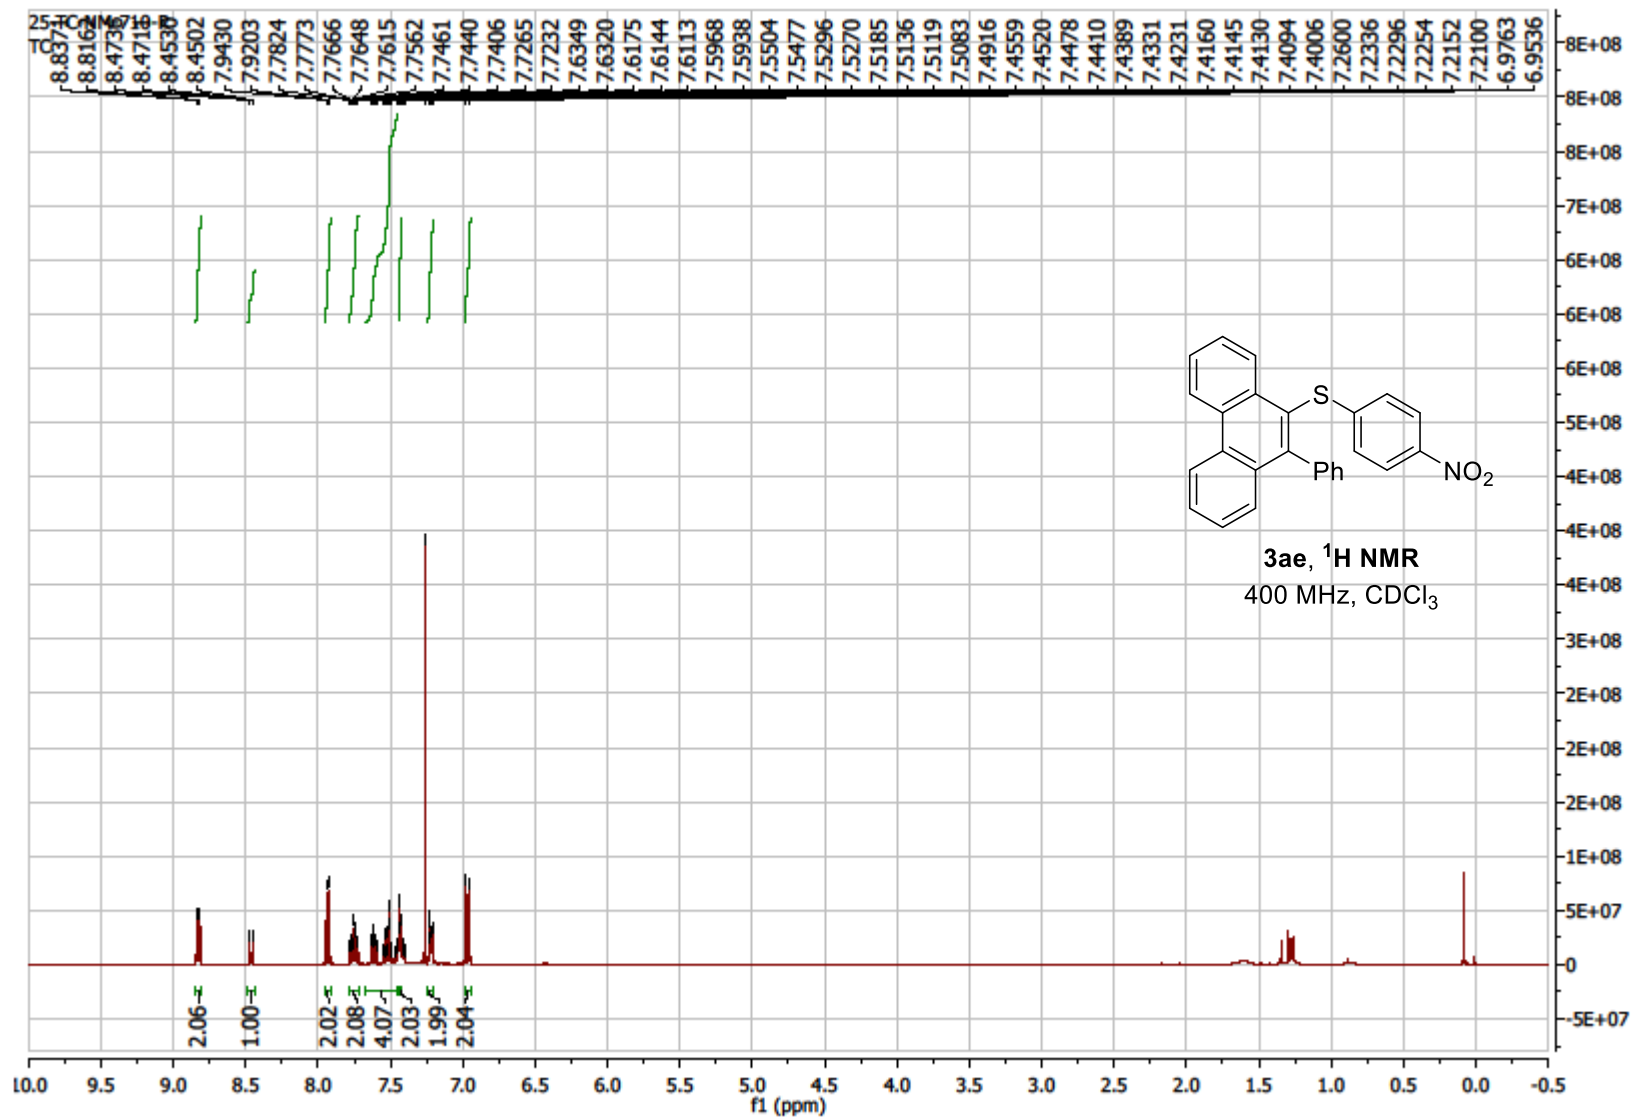

26-TC-NM-710-R  
TC

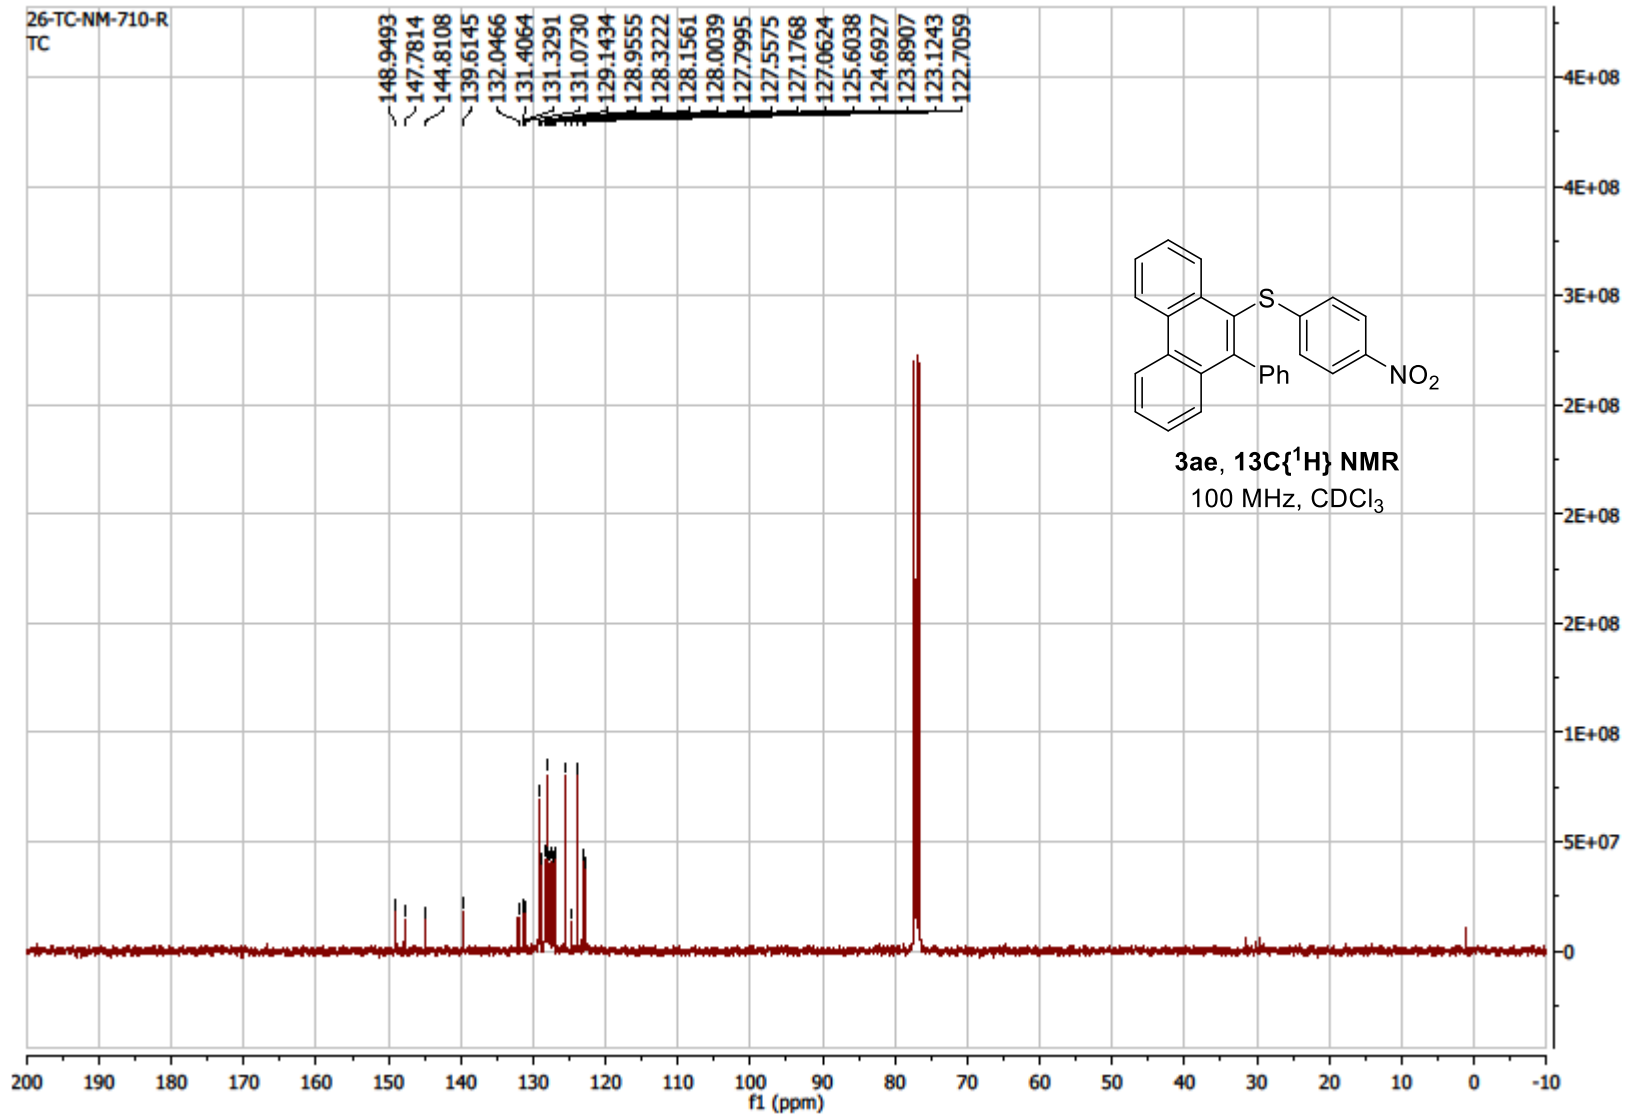

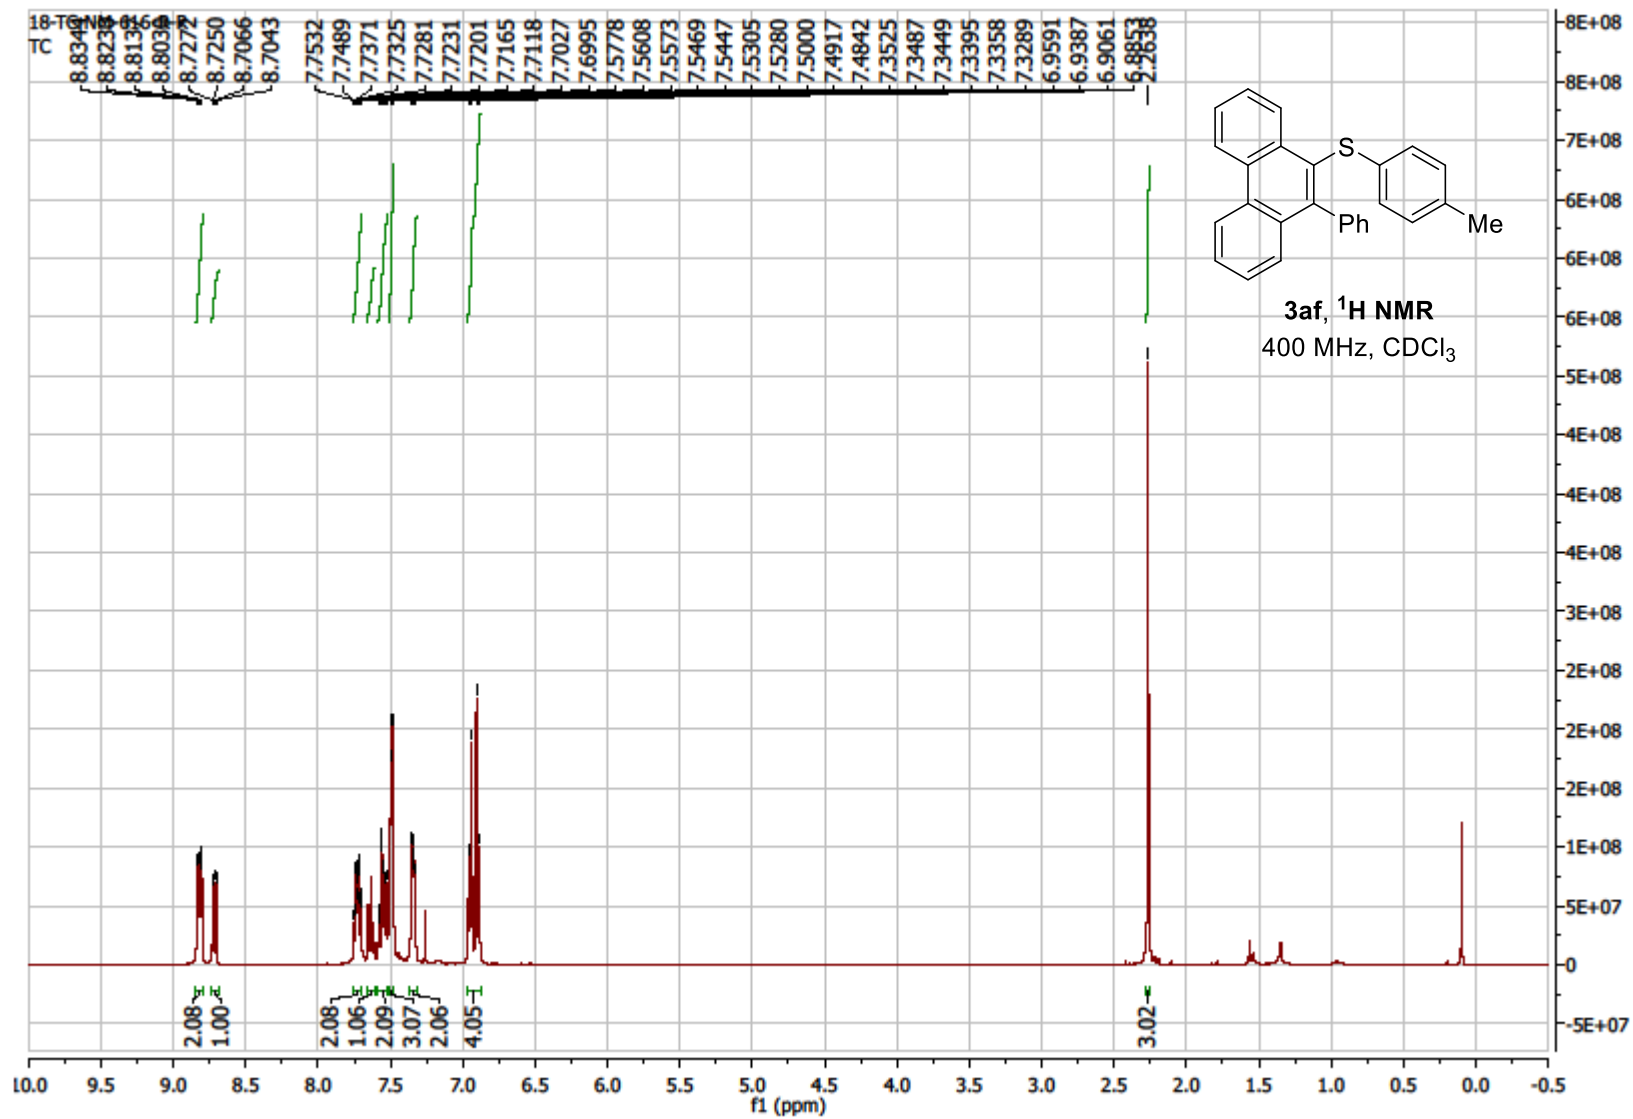

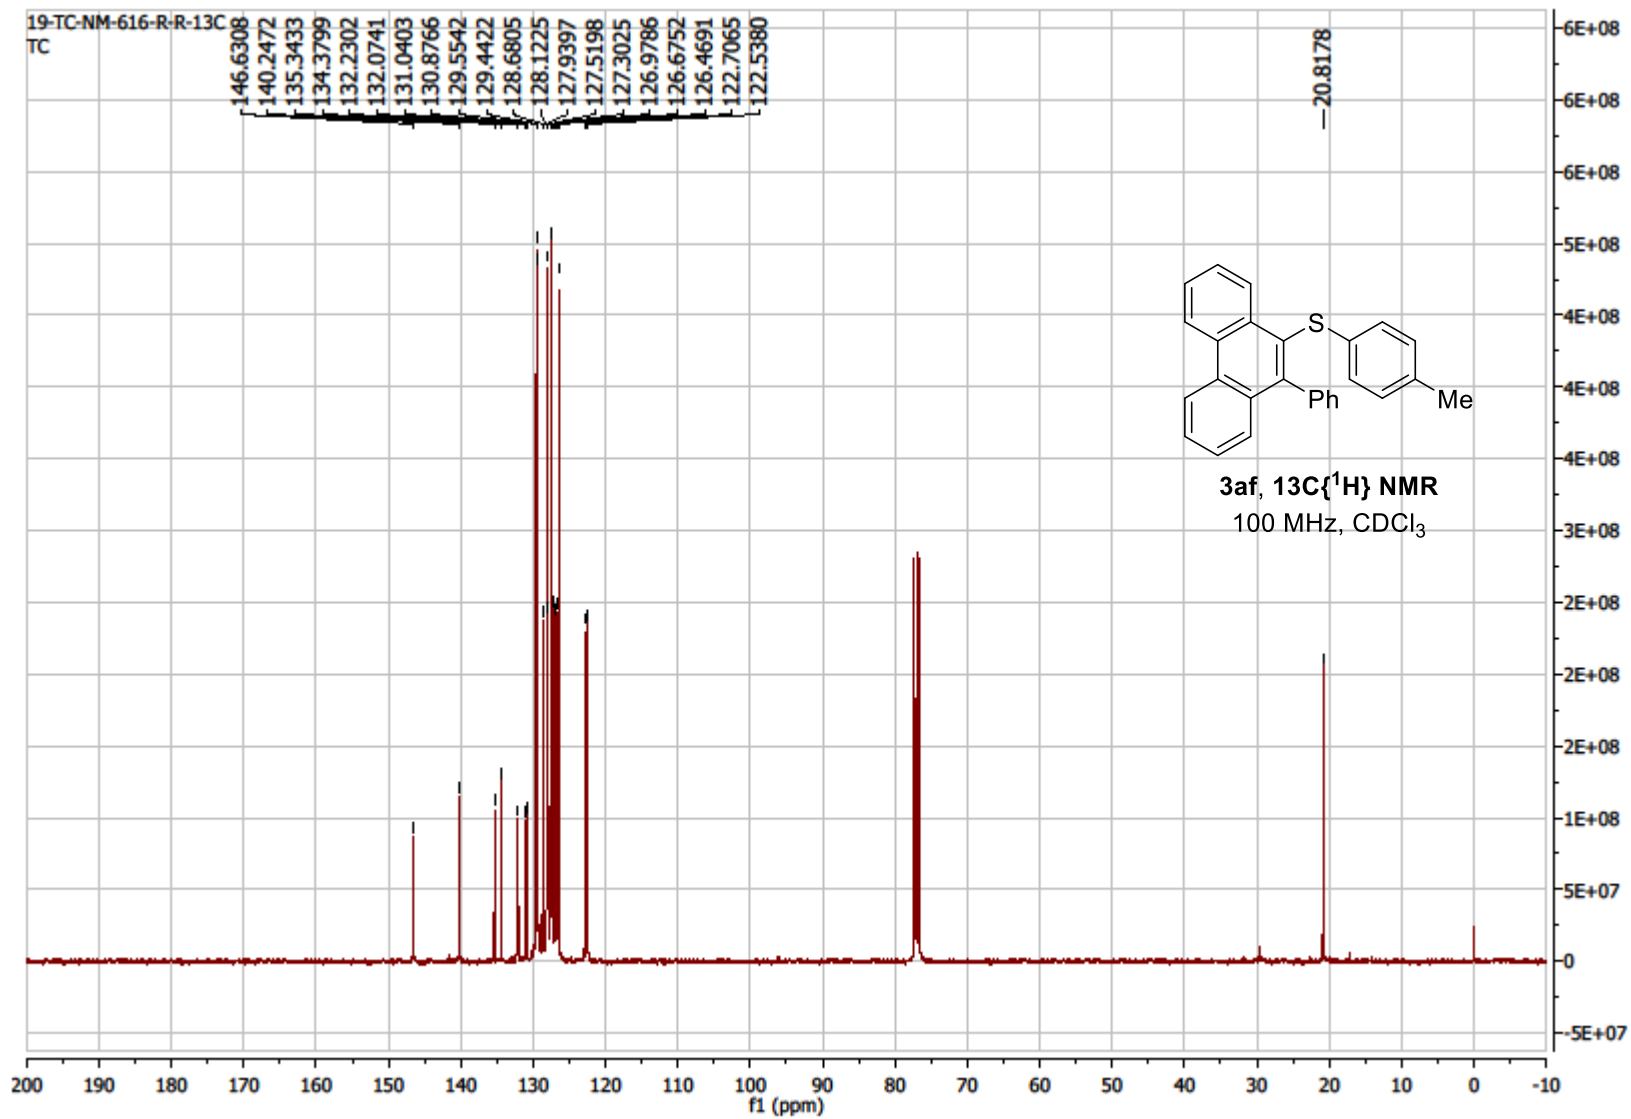



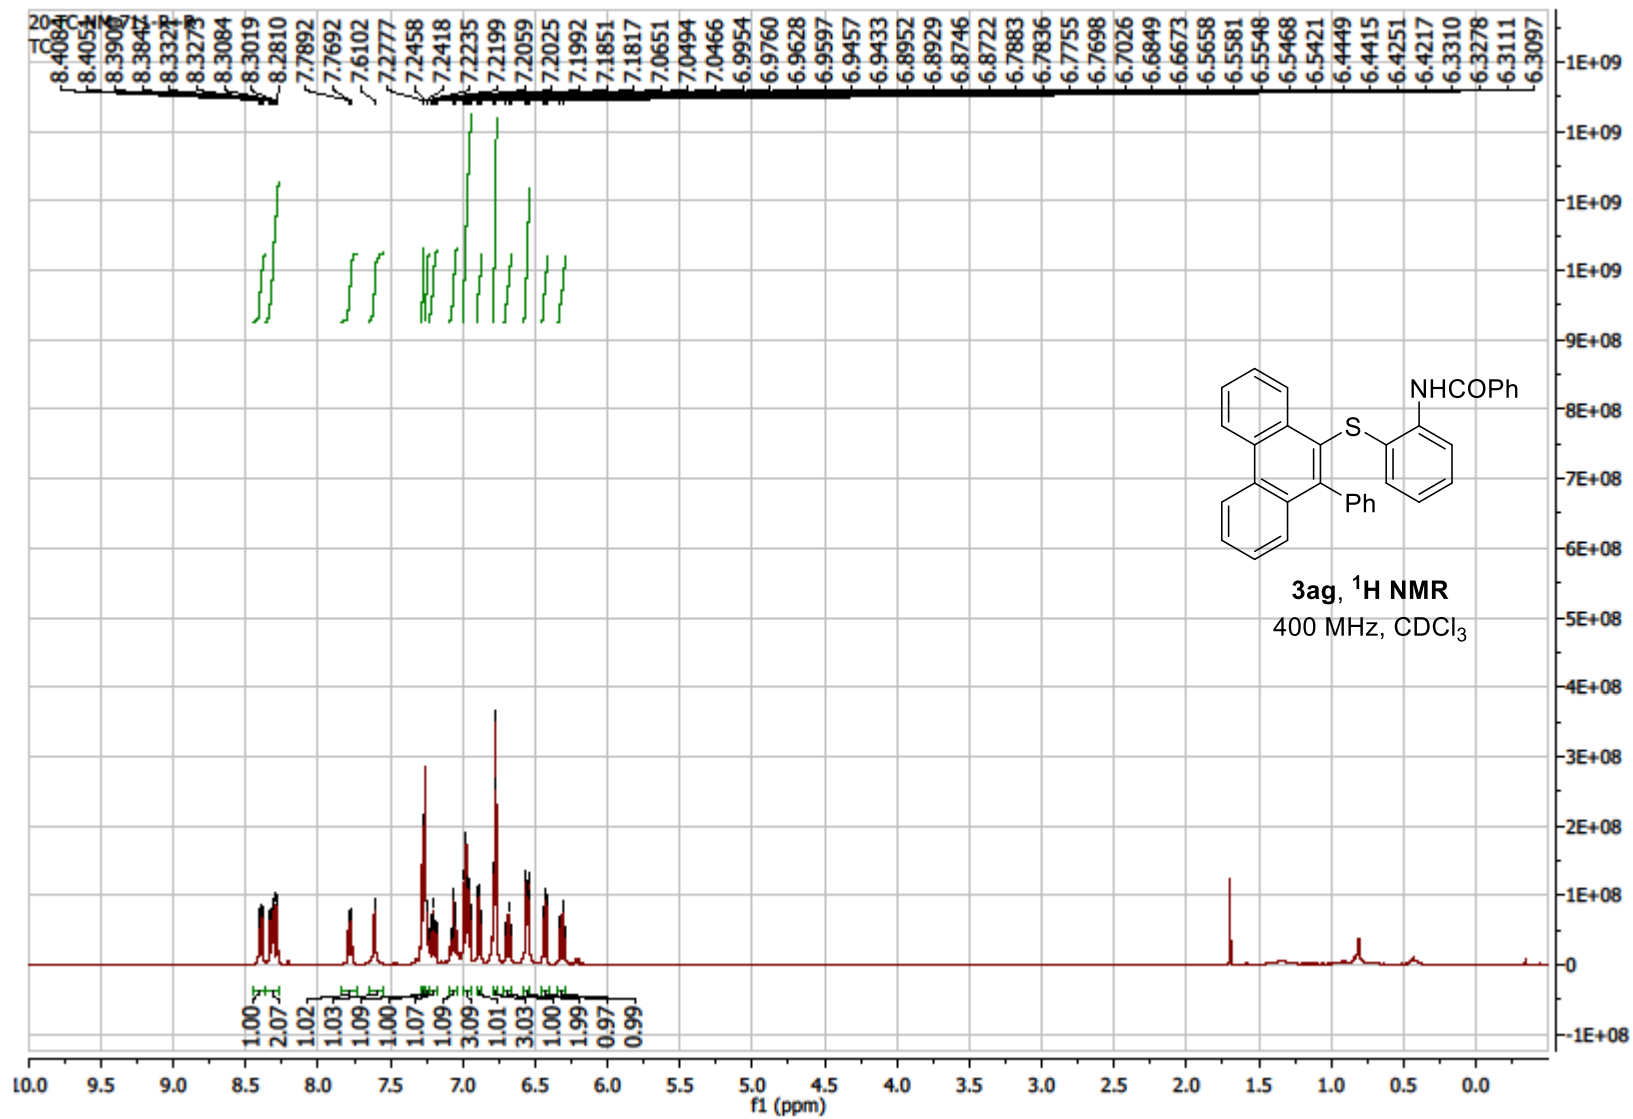

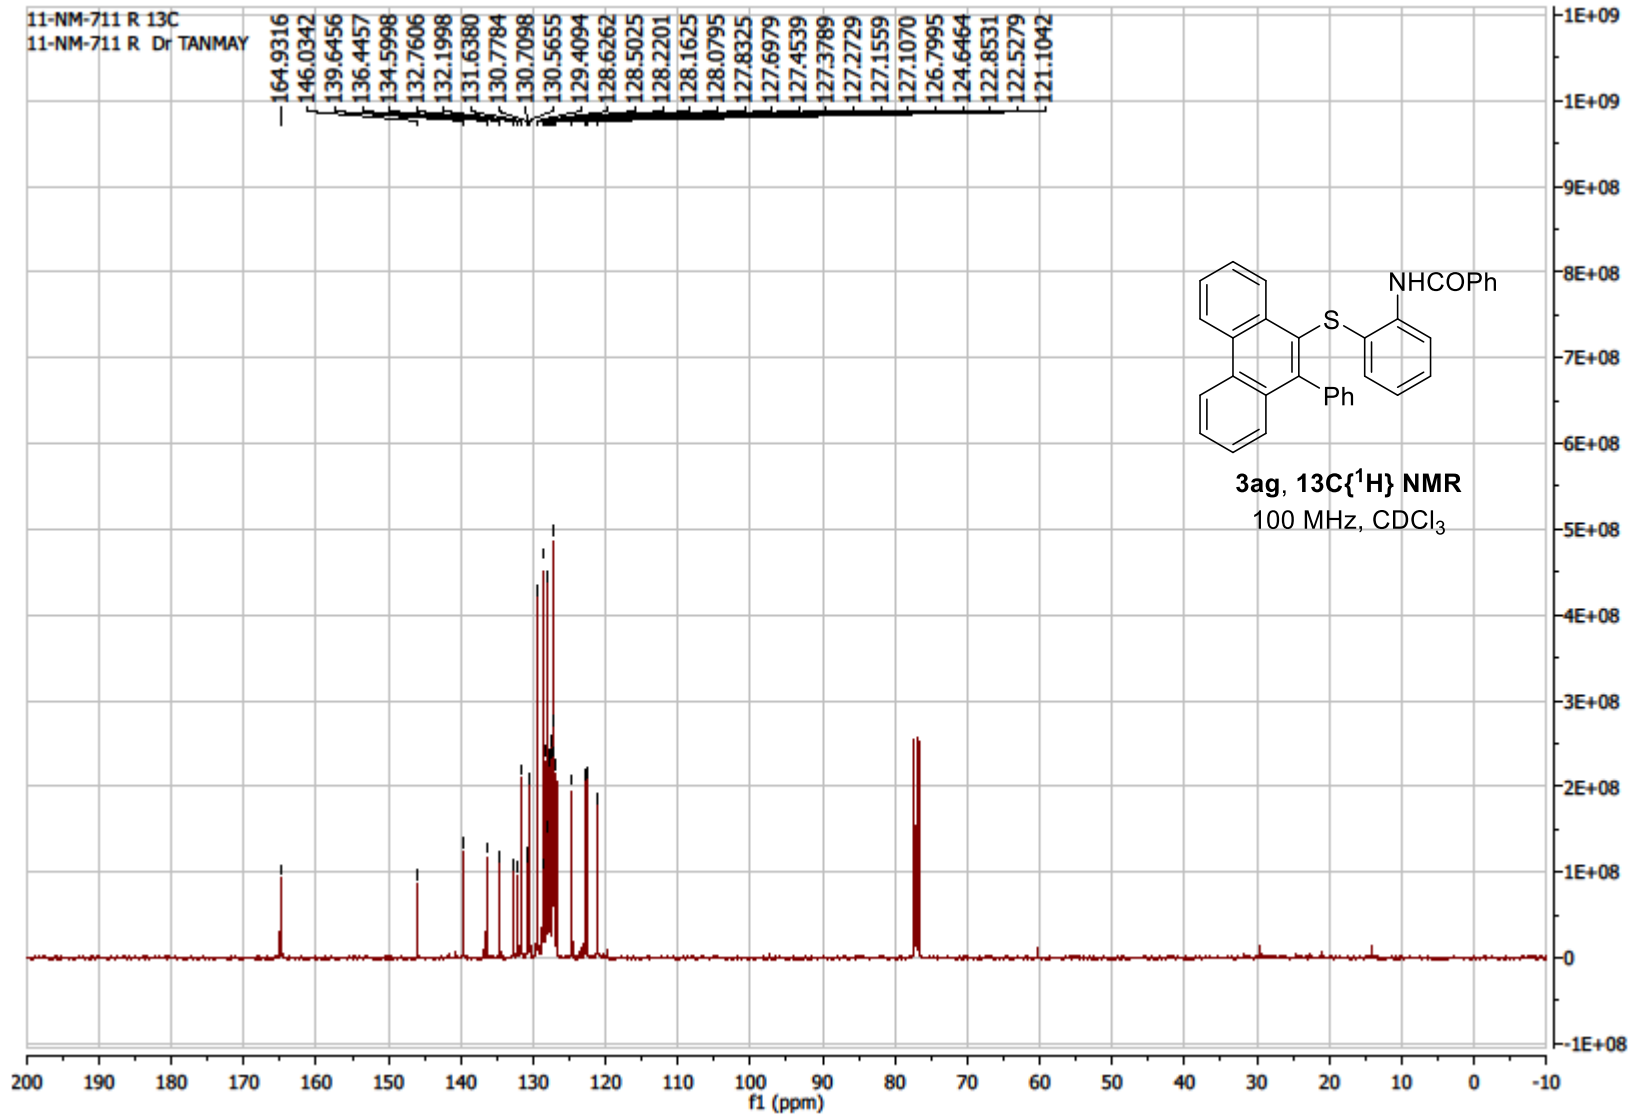

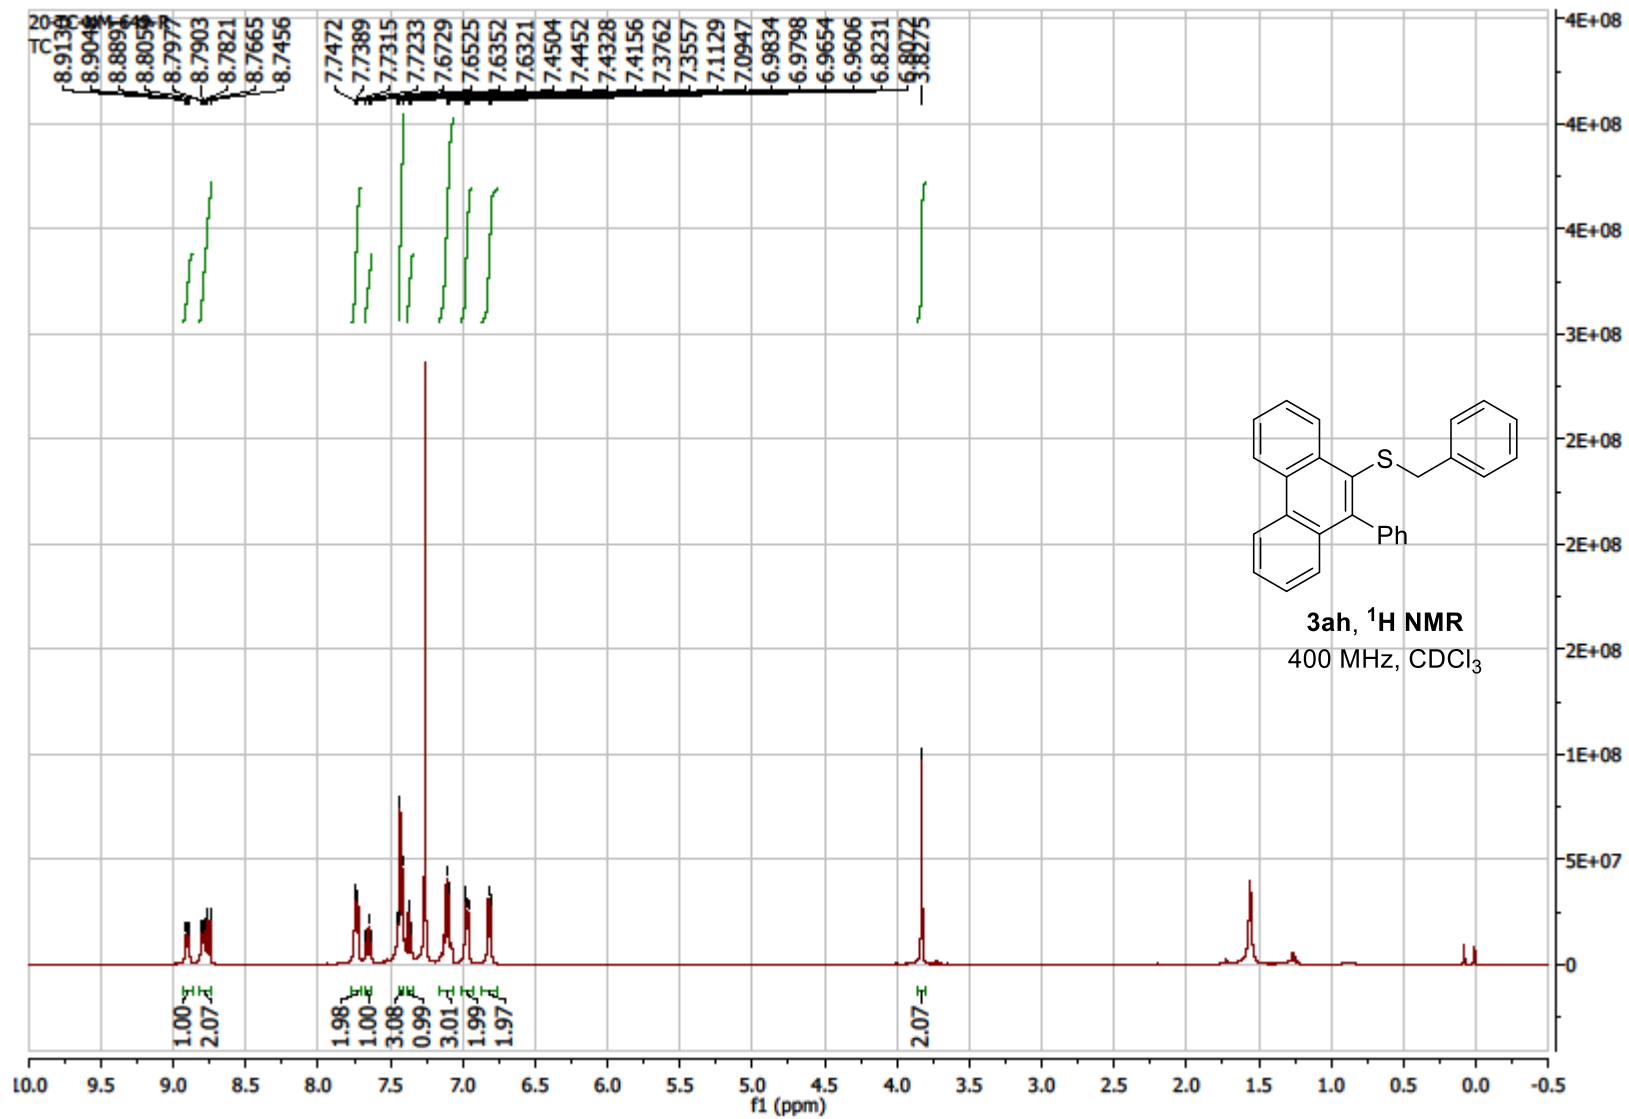

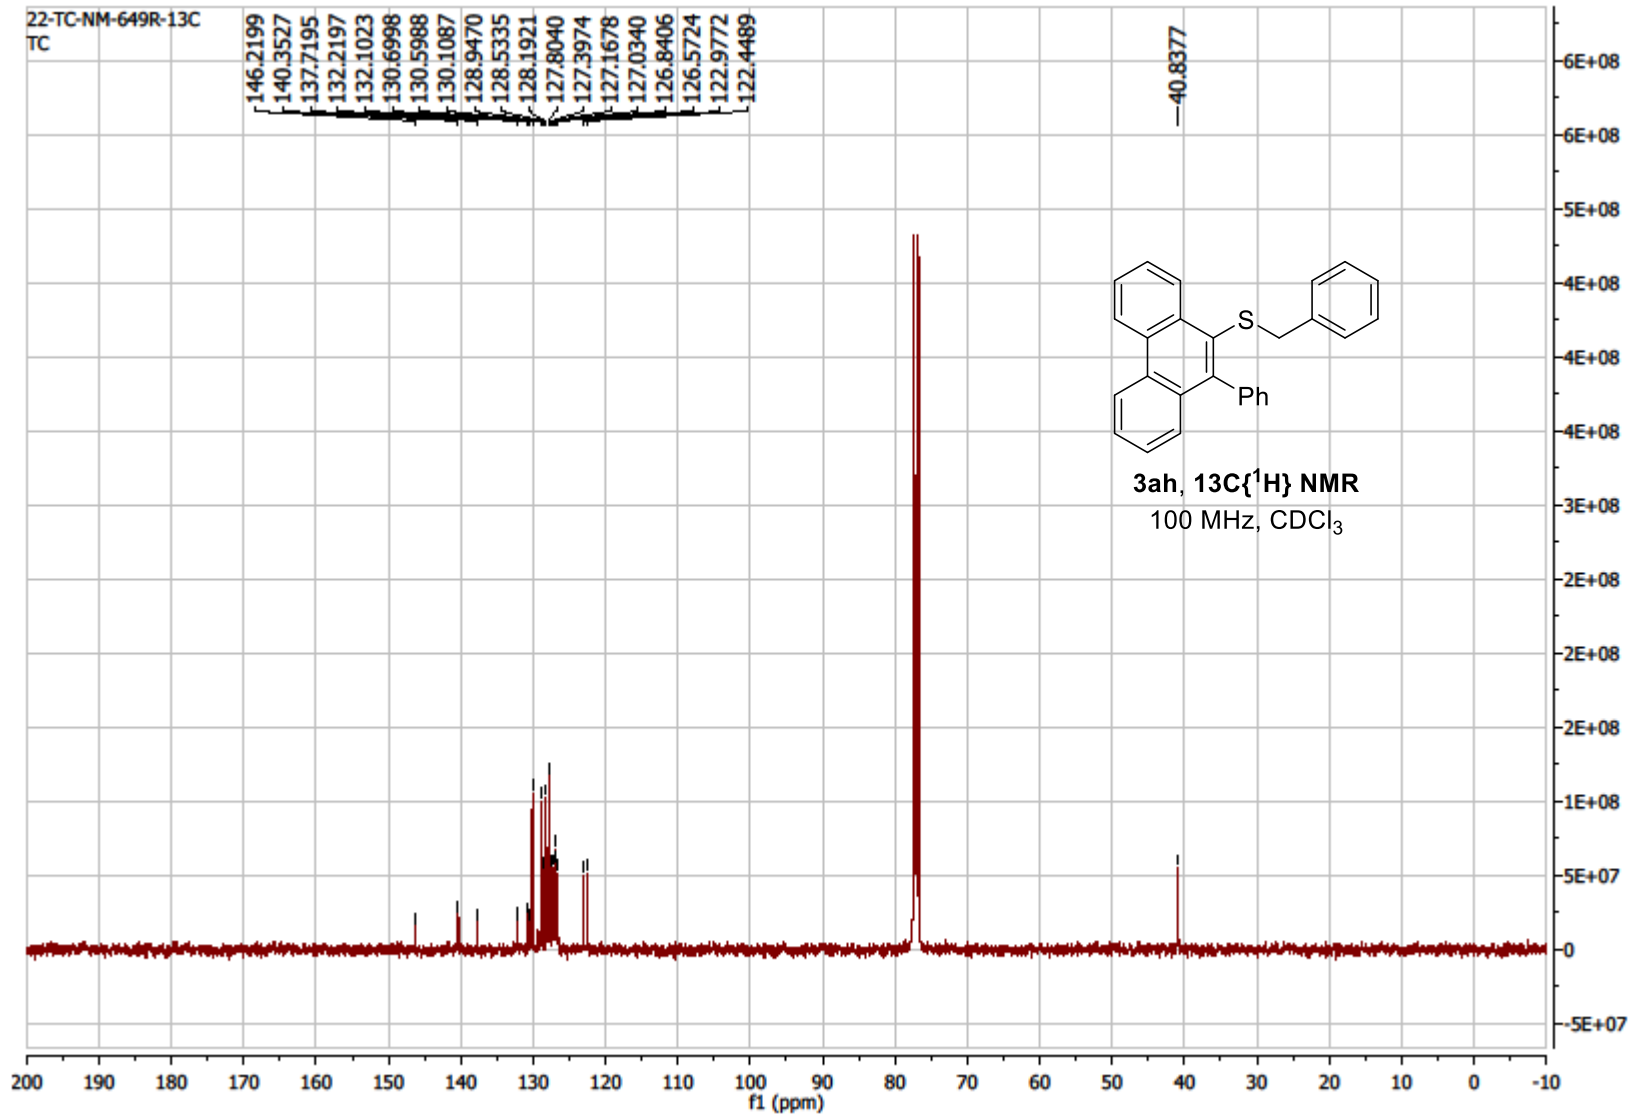

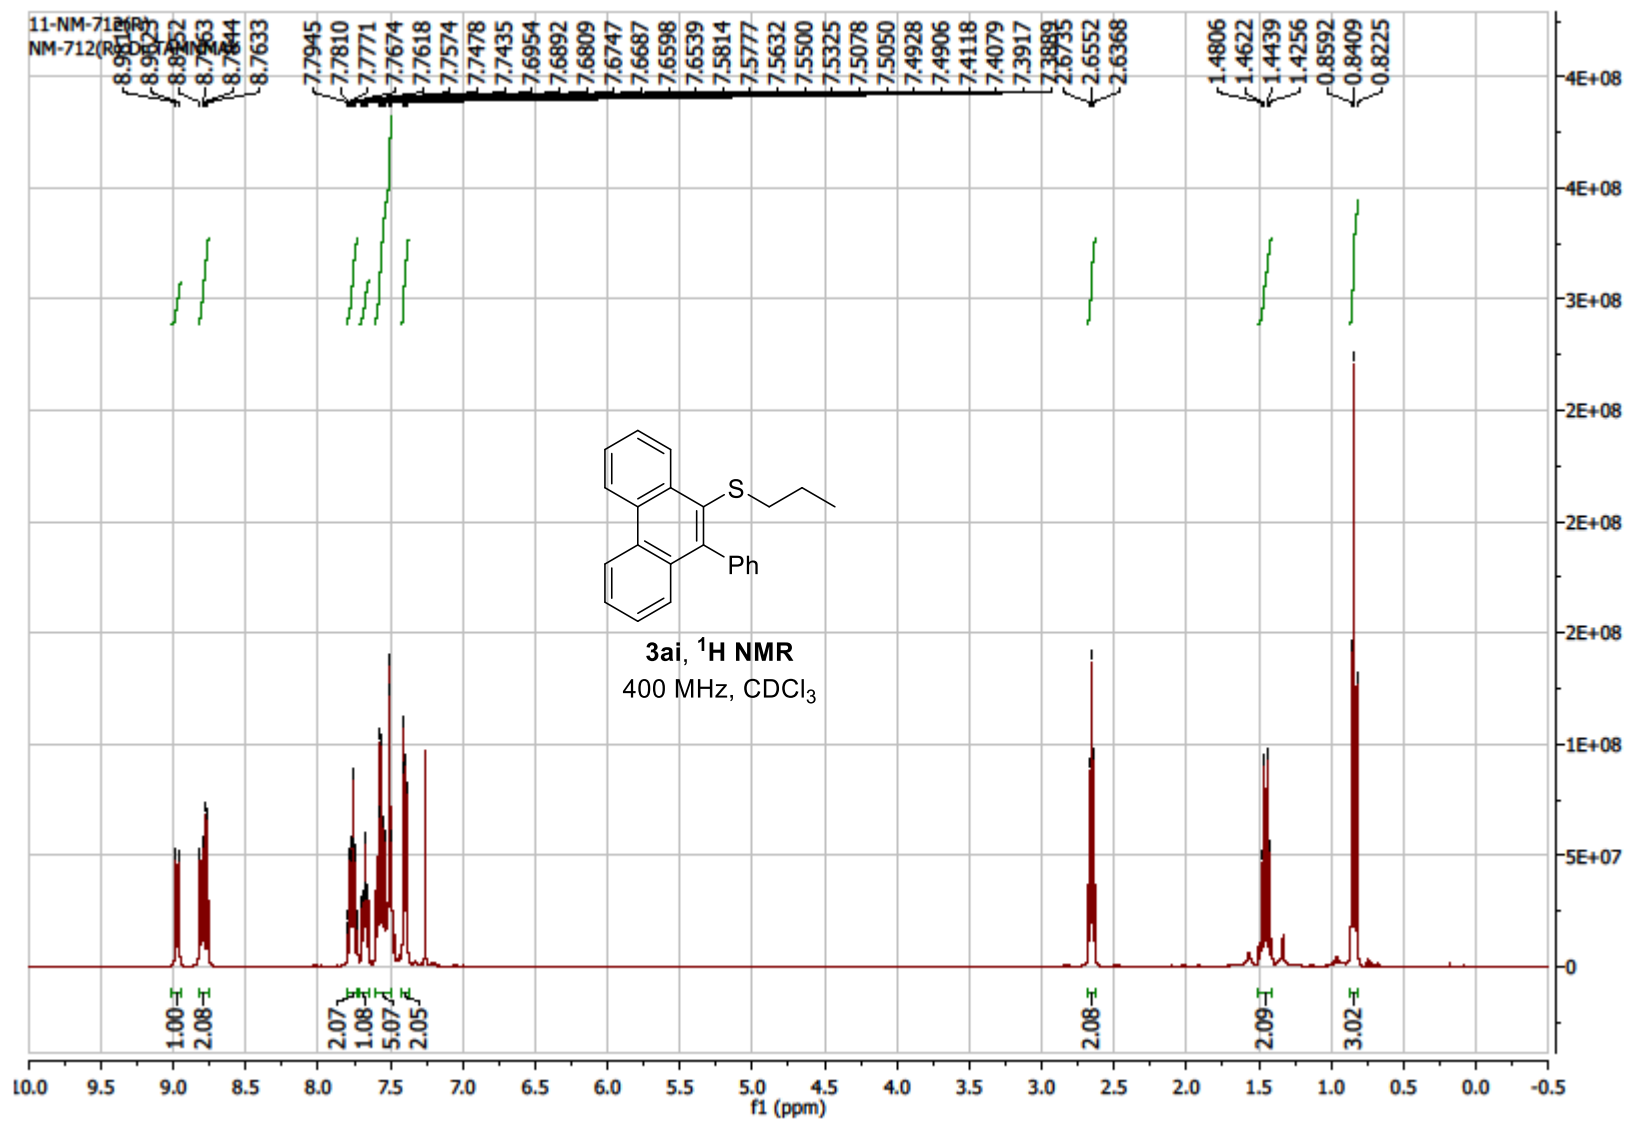

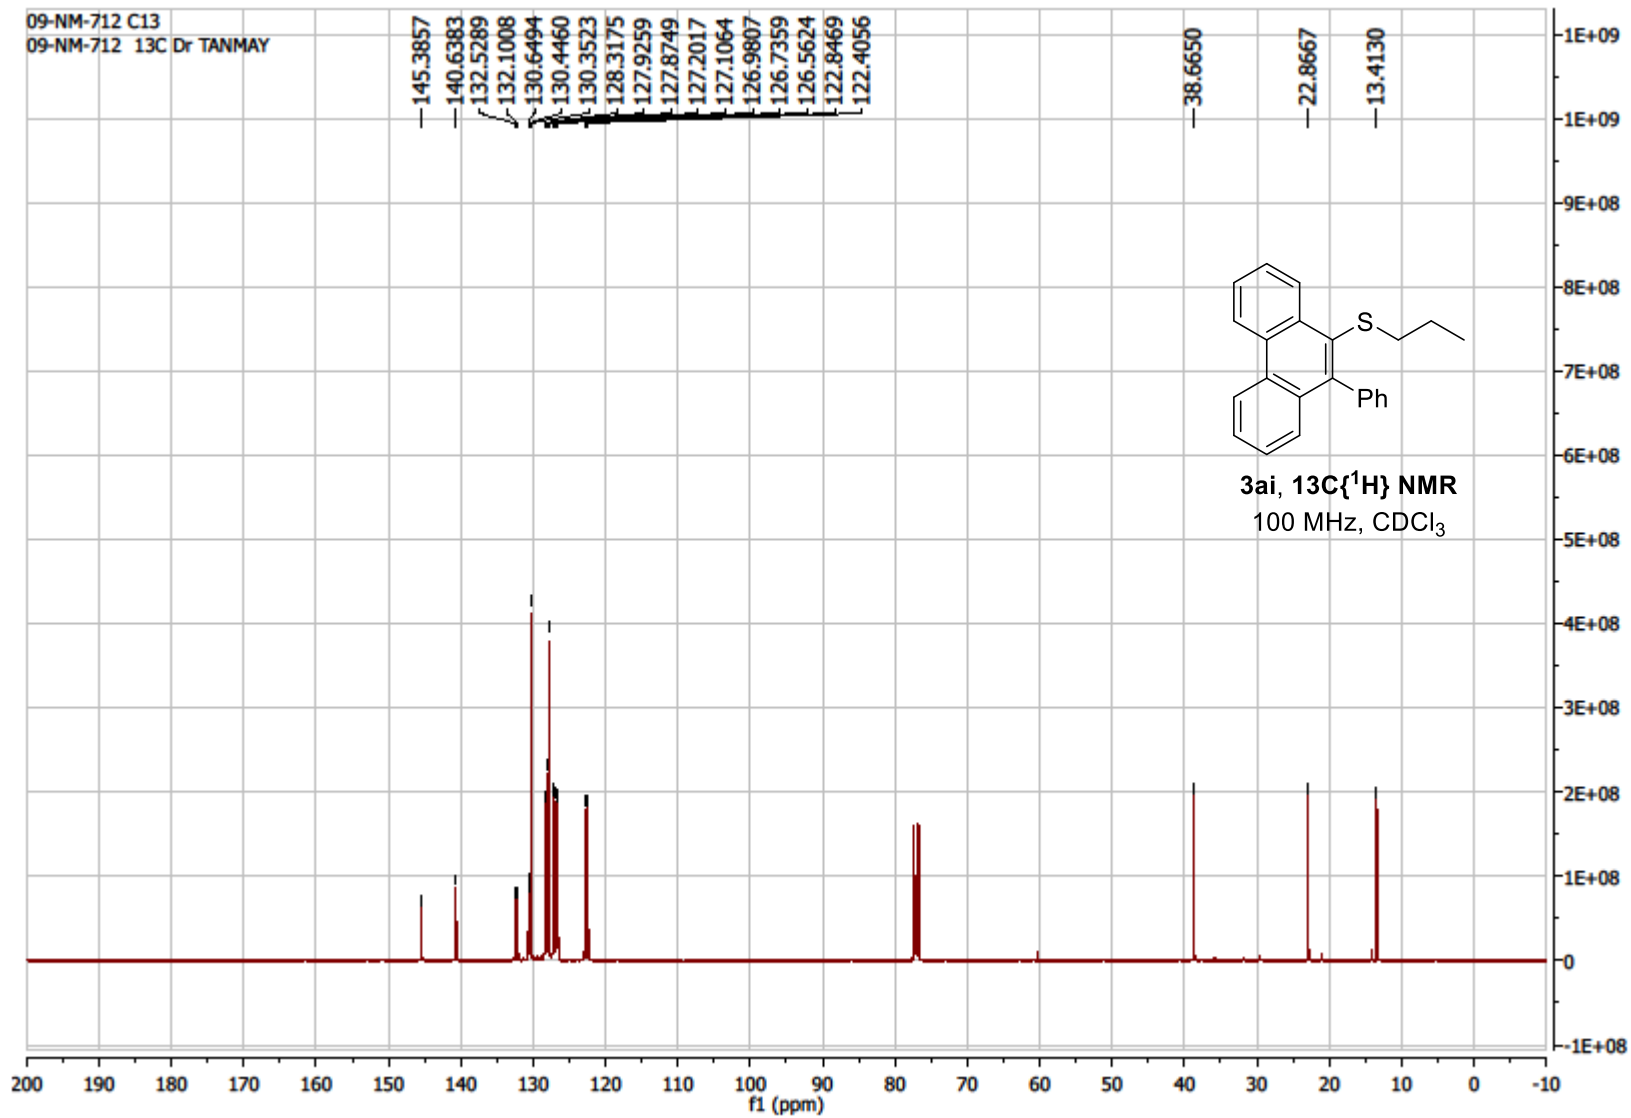

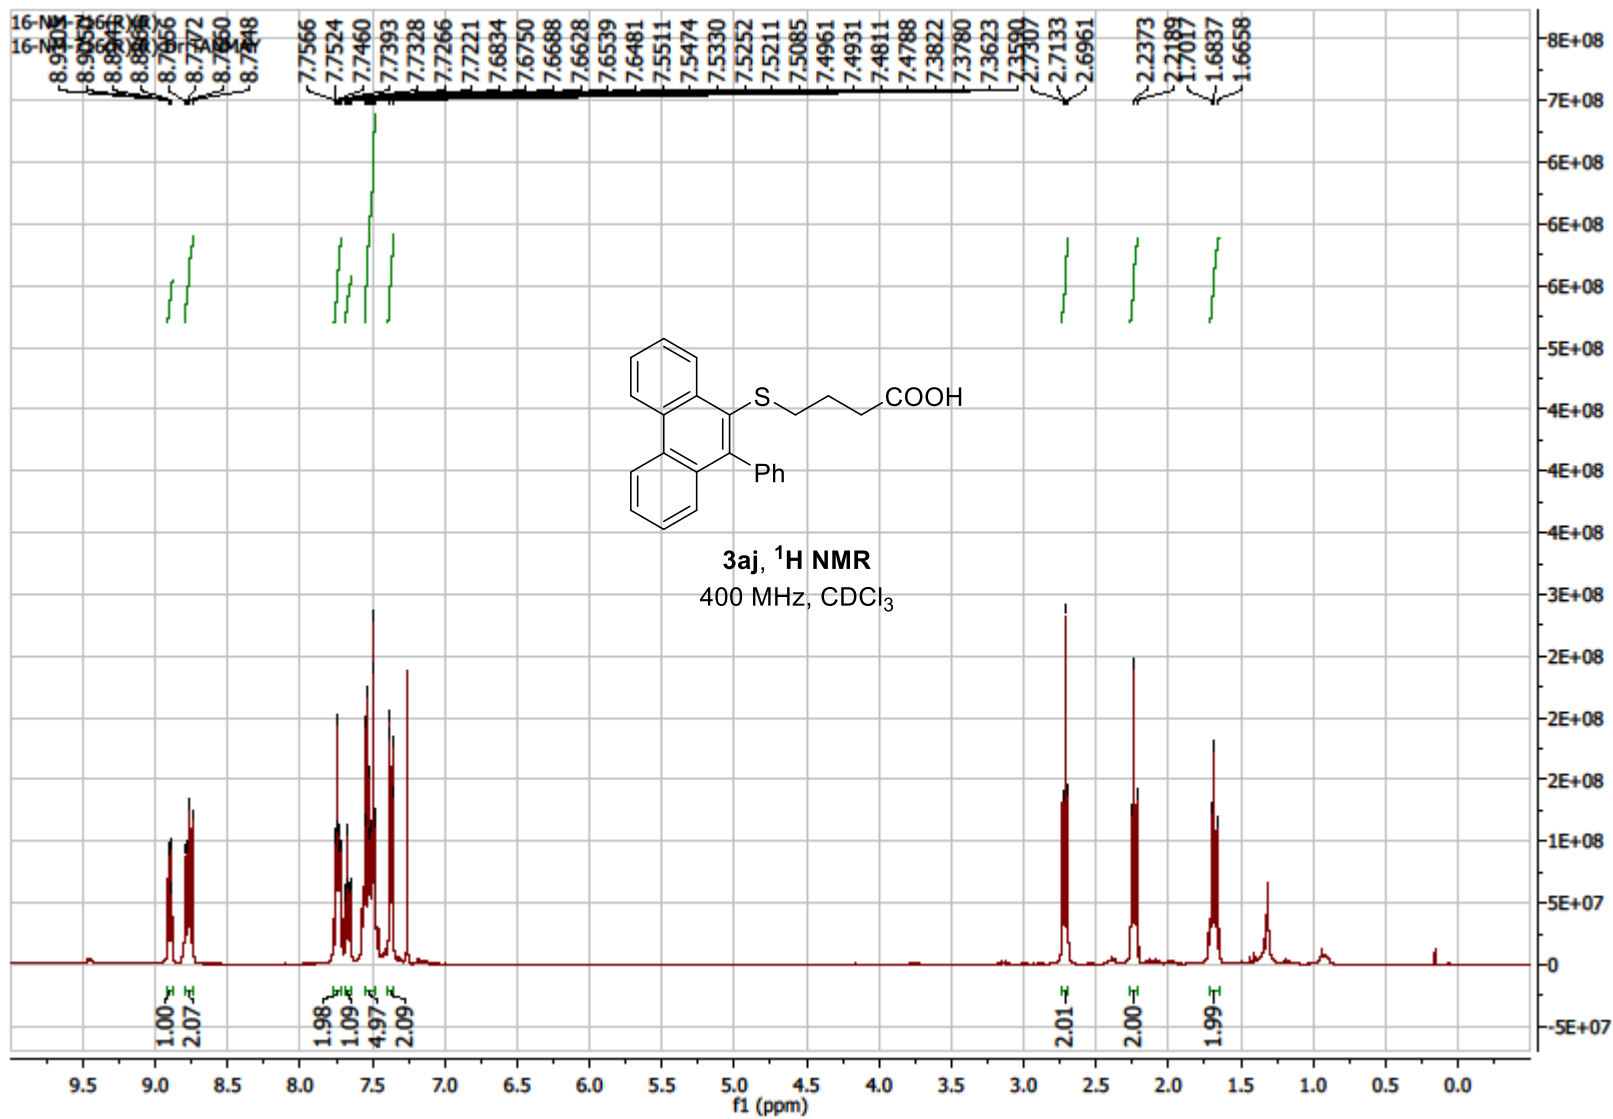

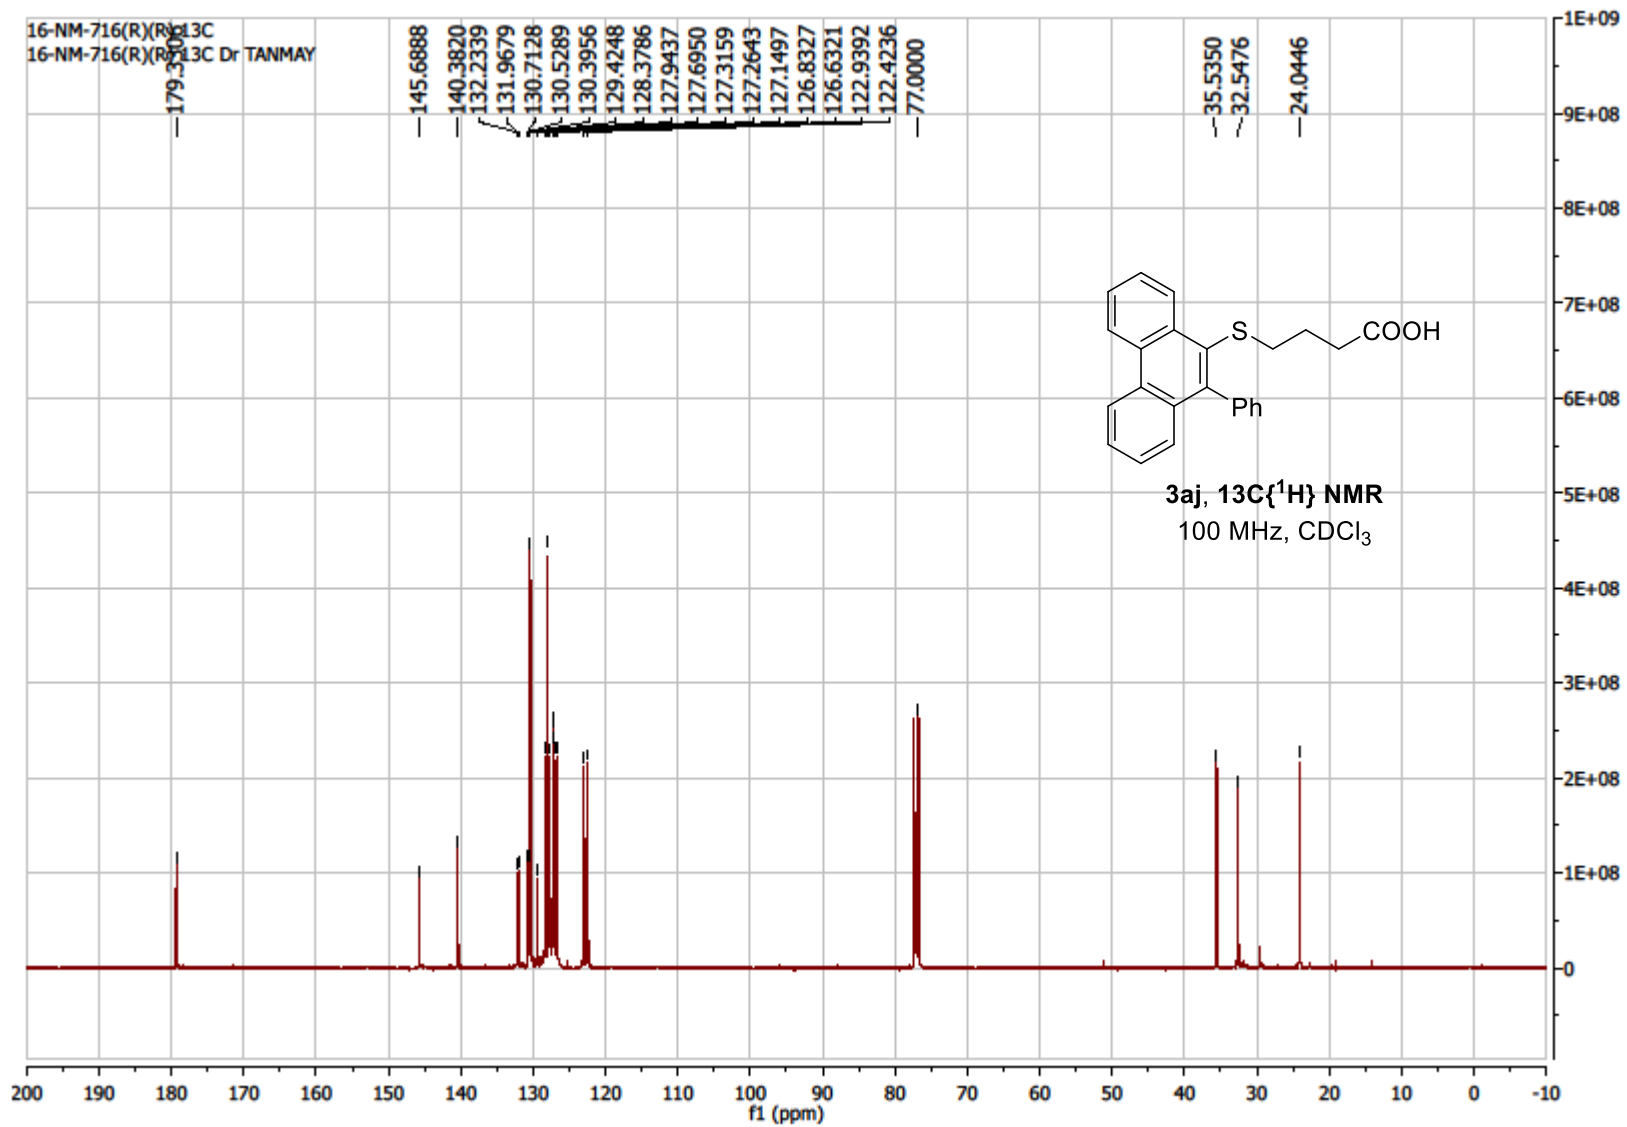



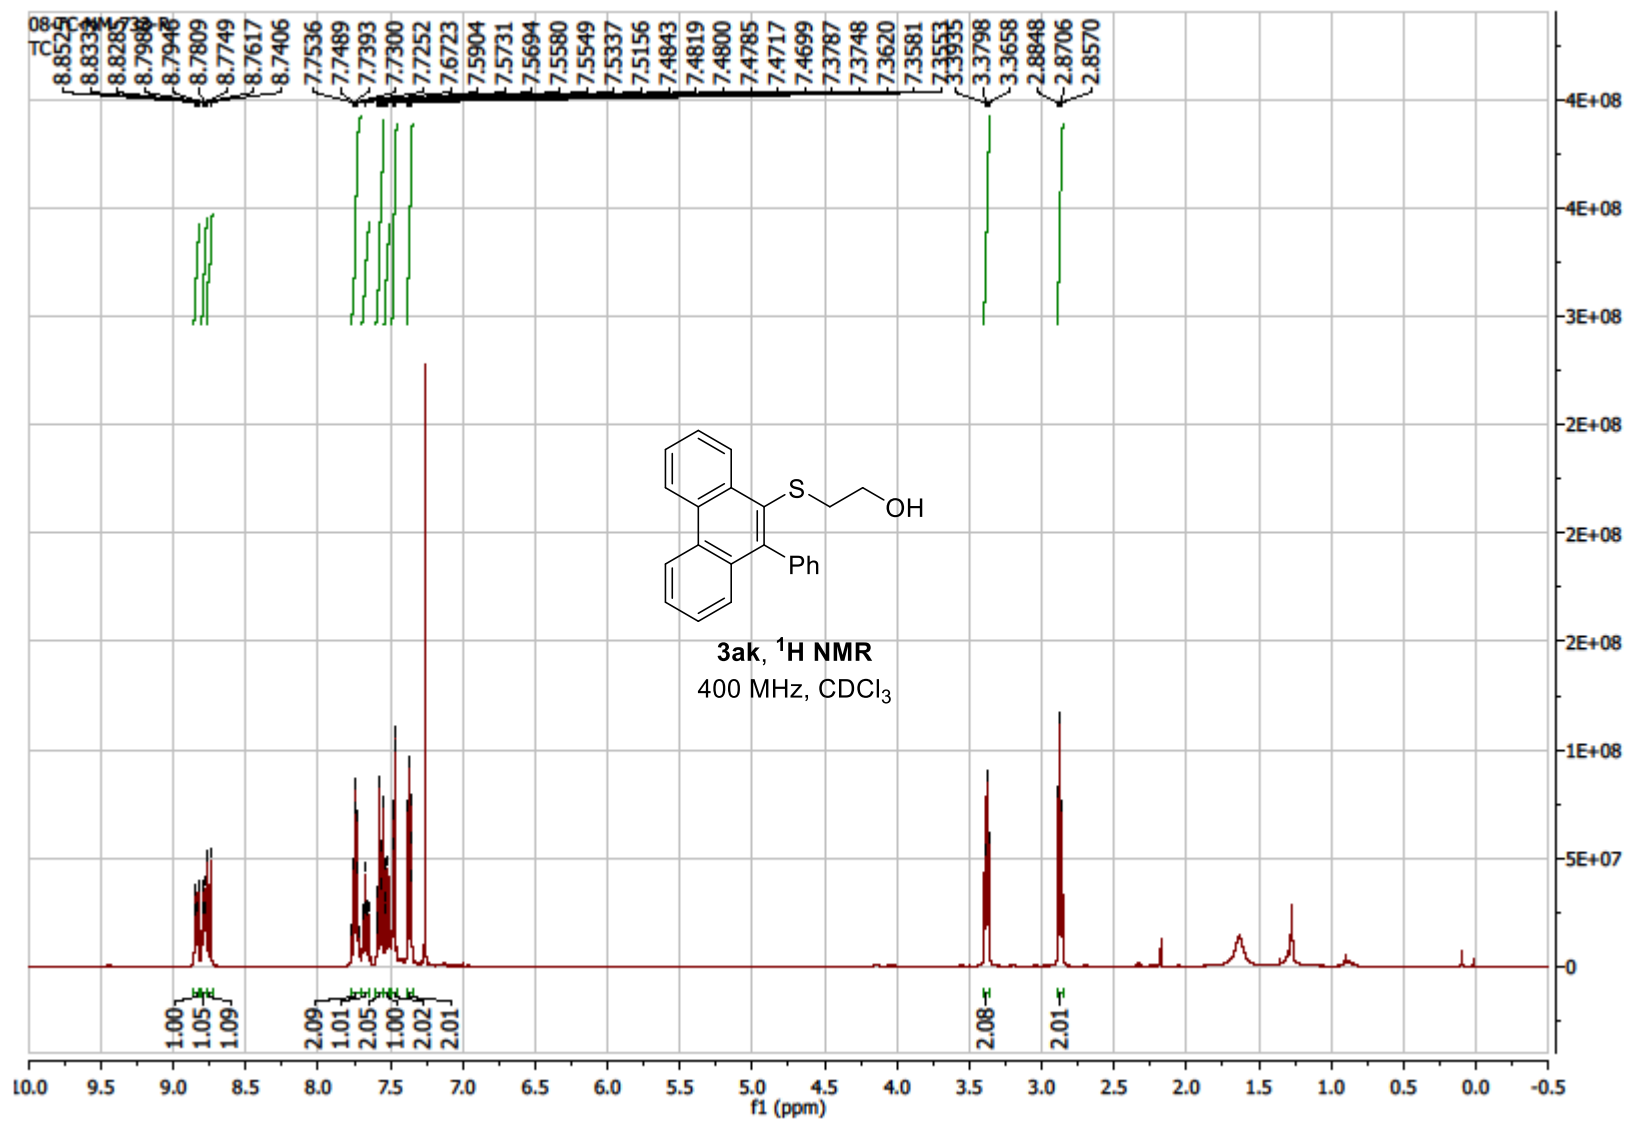

09-TC-NM-733-R-13C  
TC

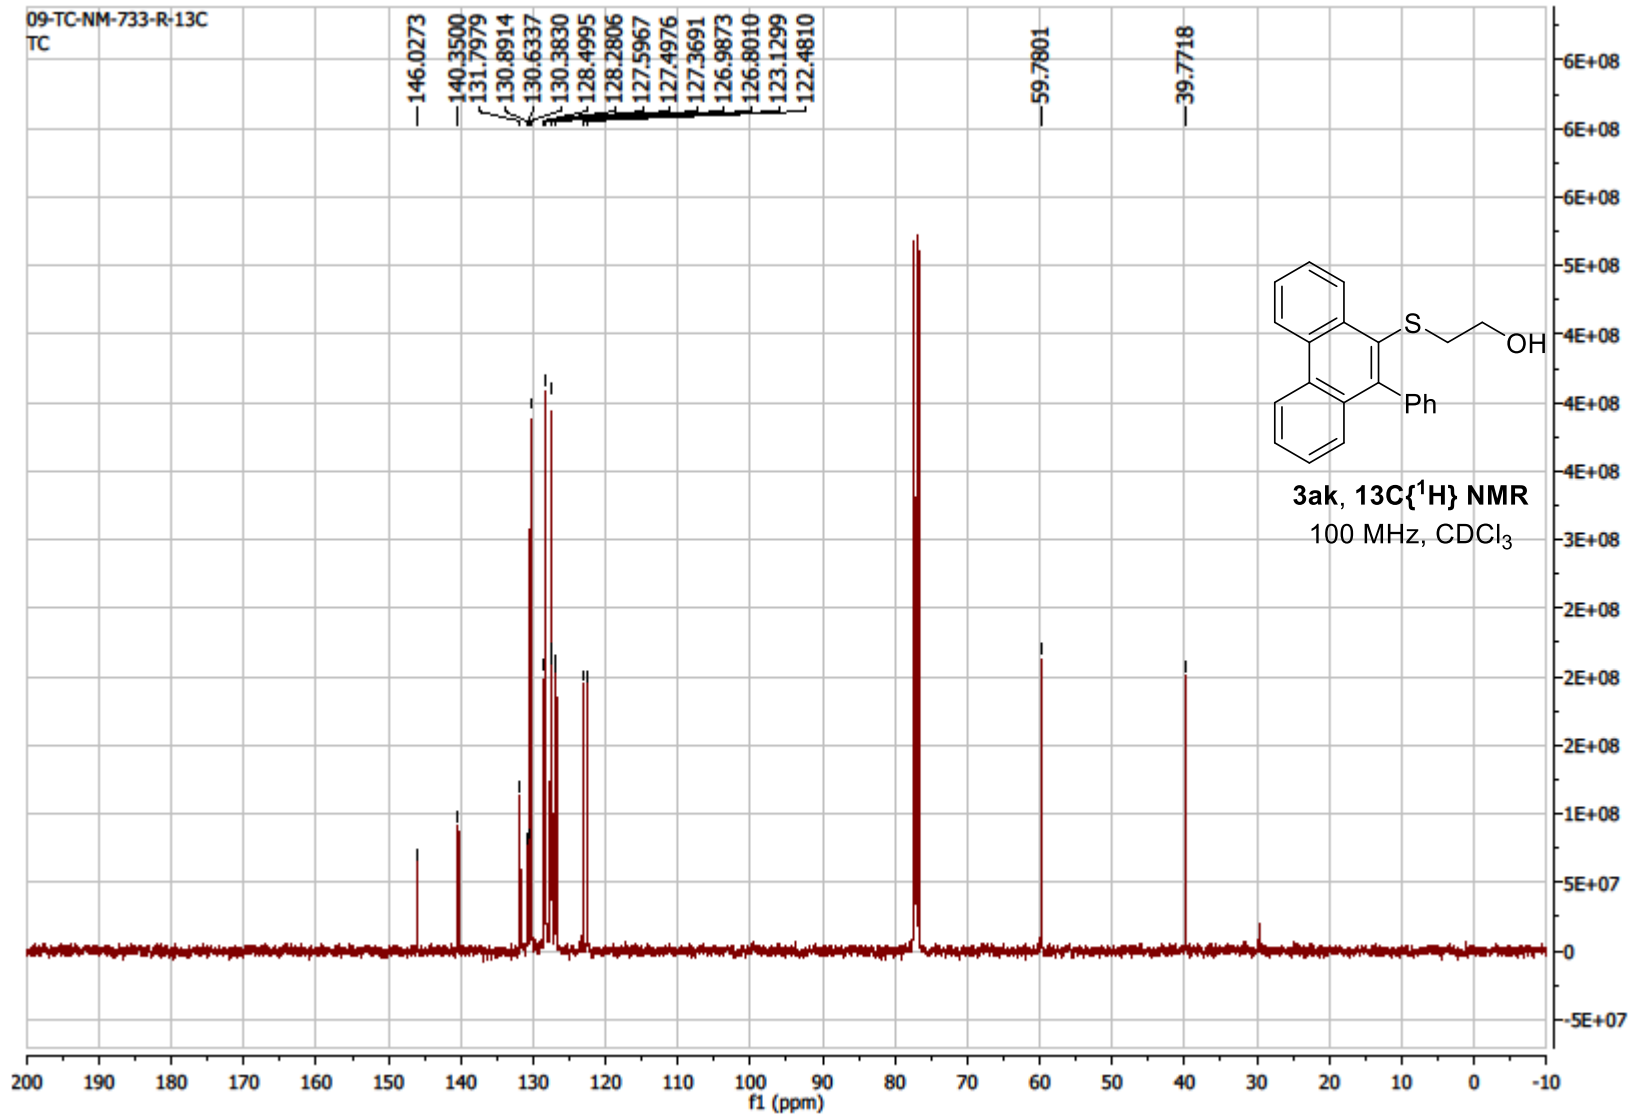

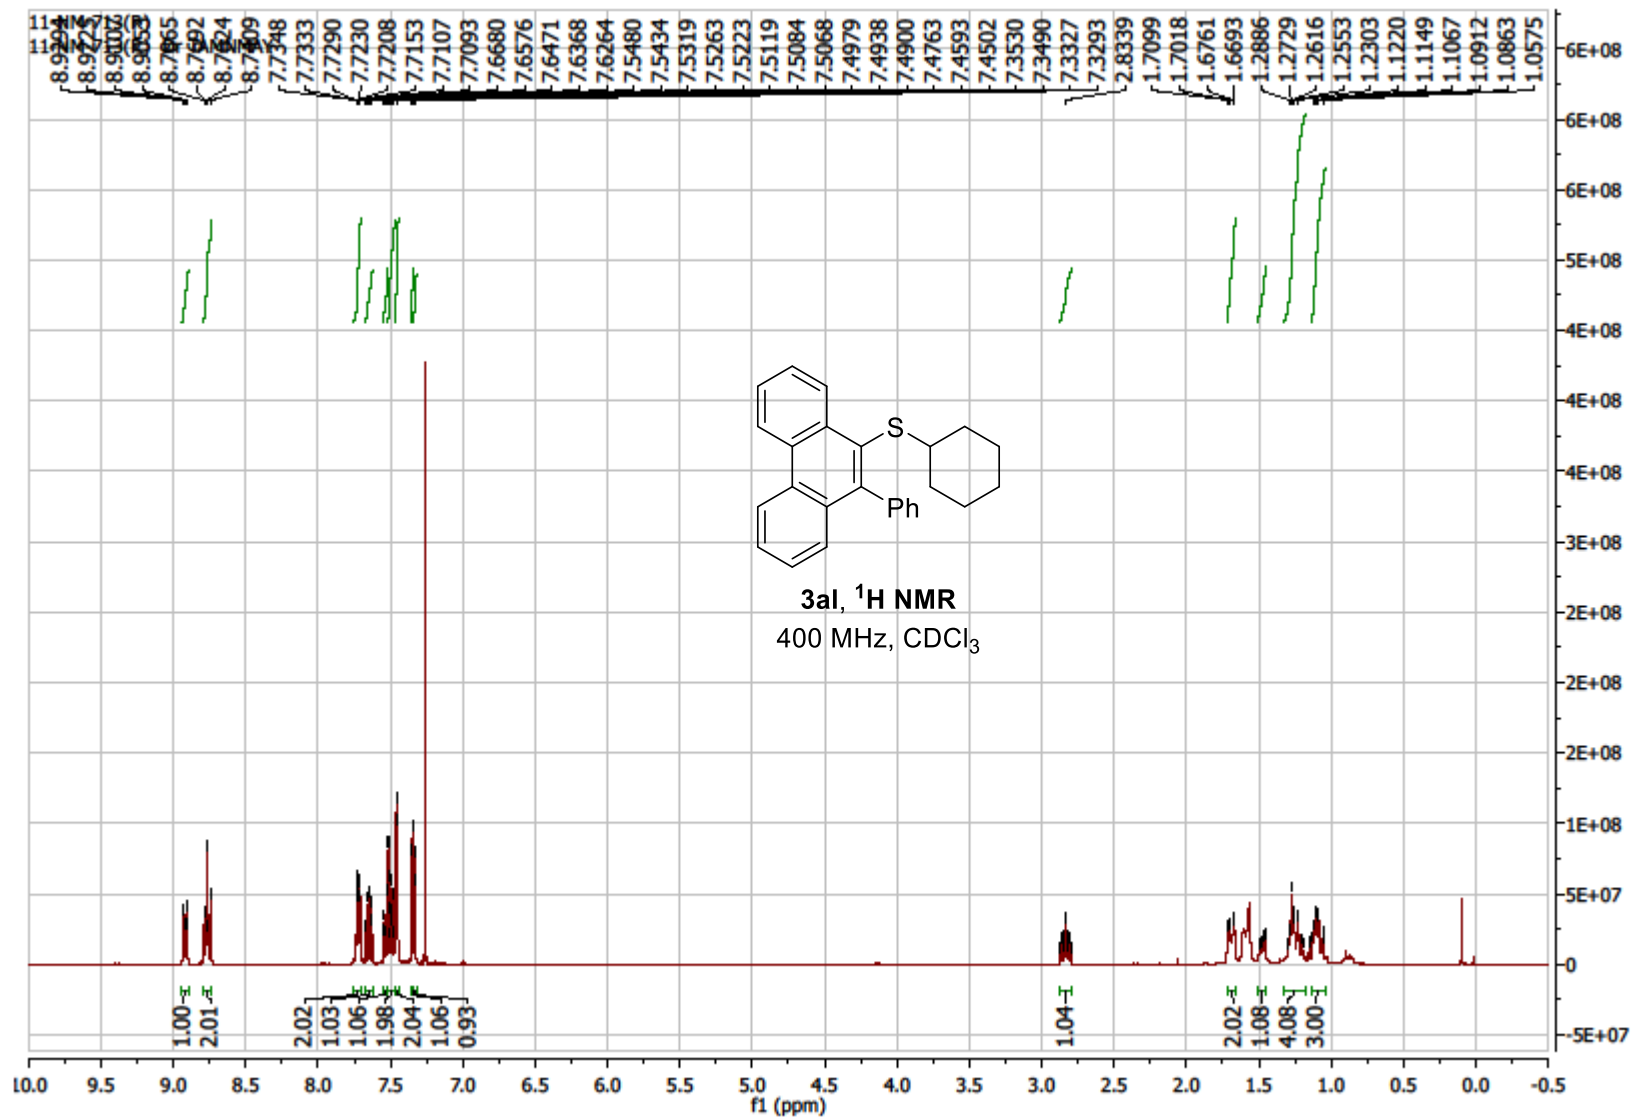

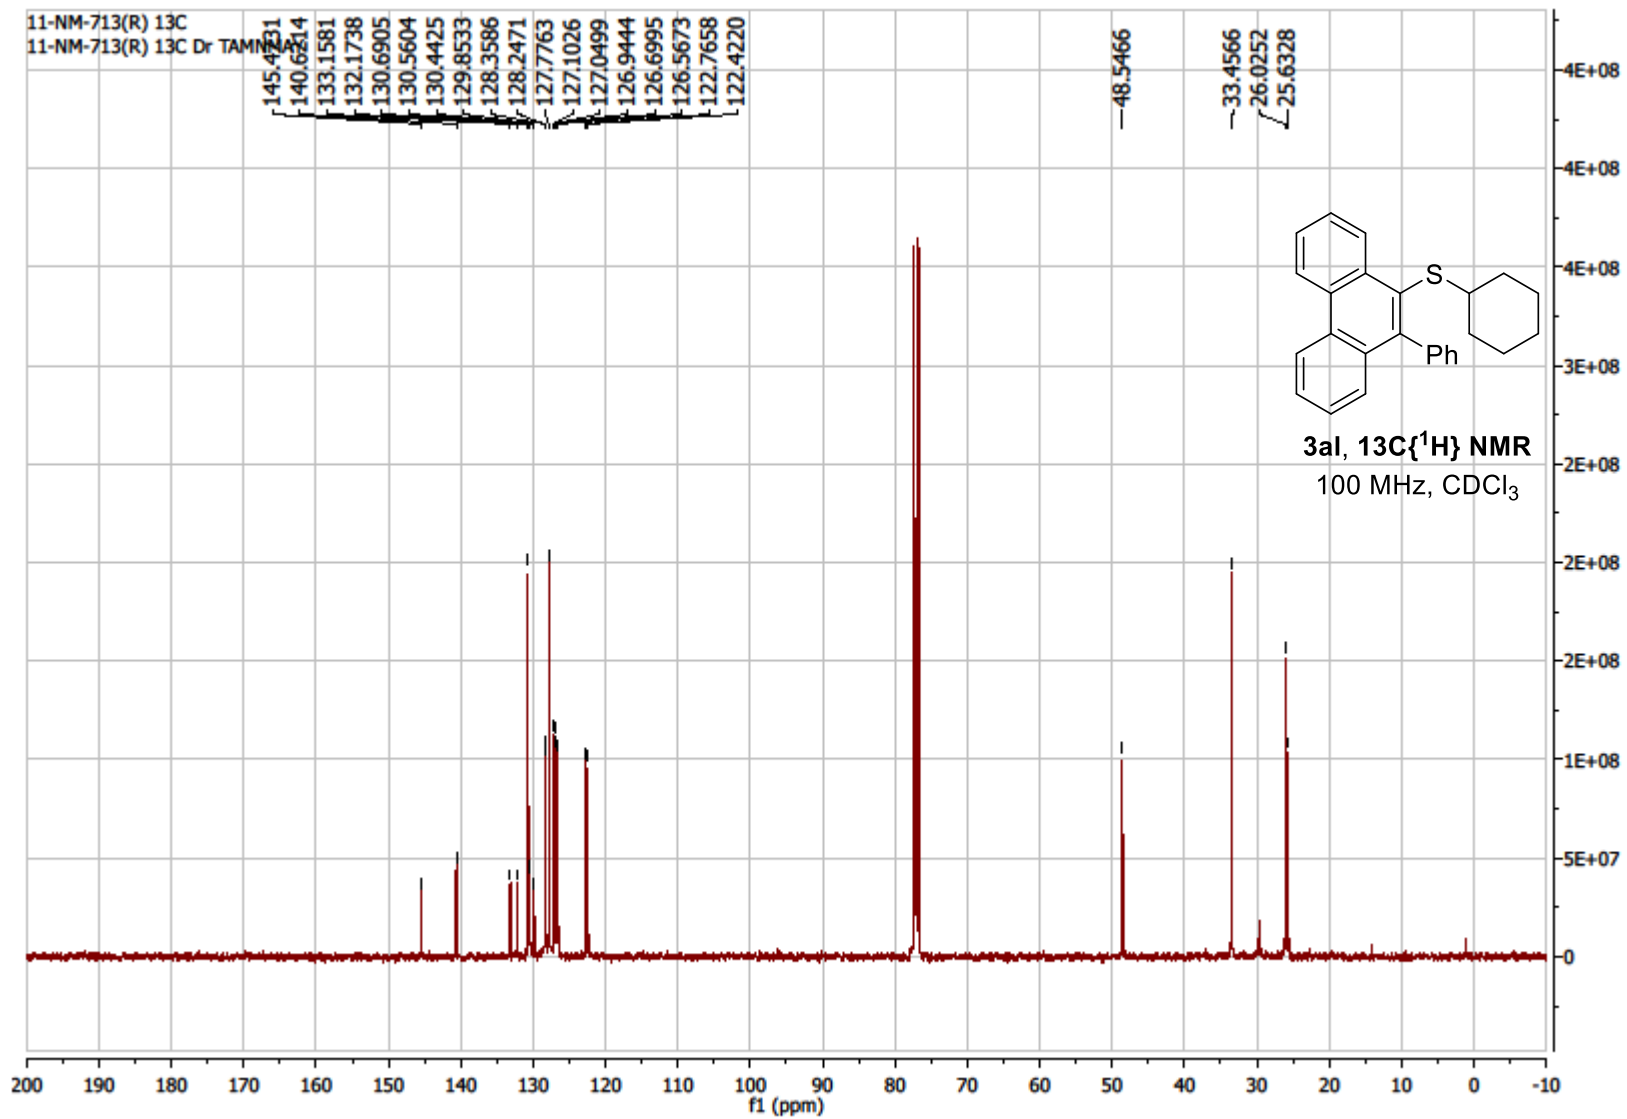

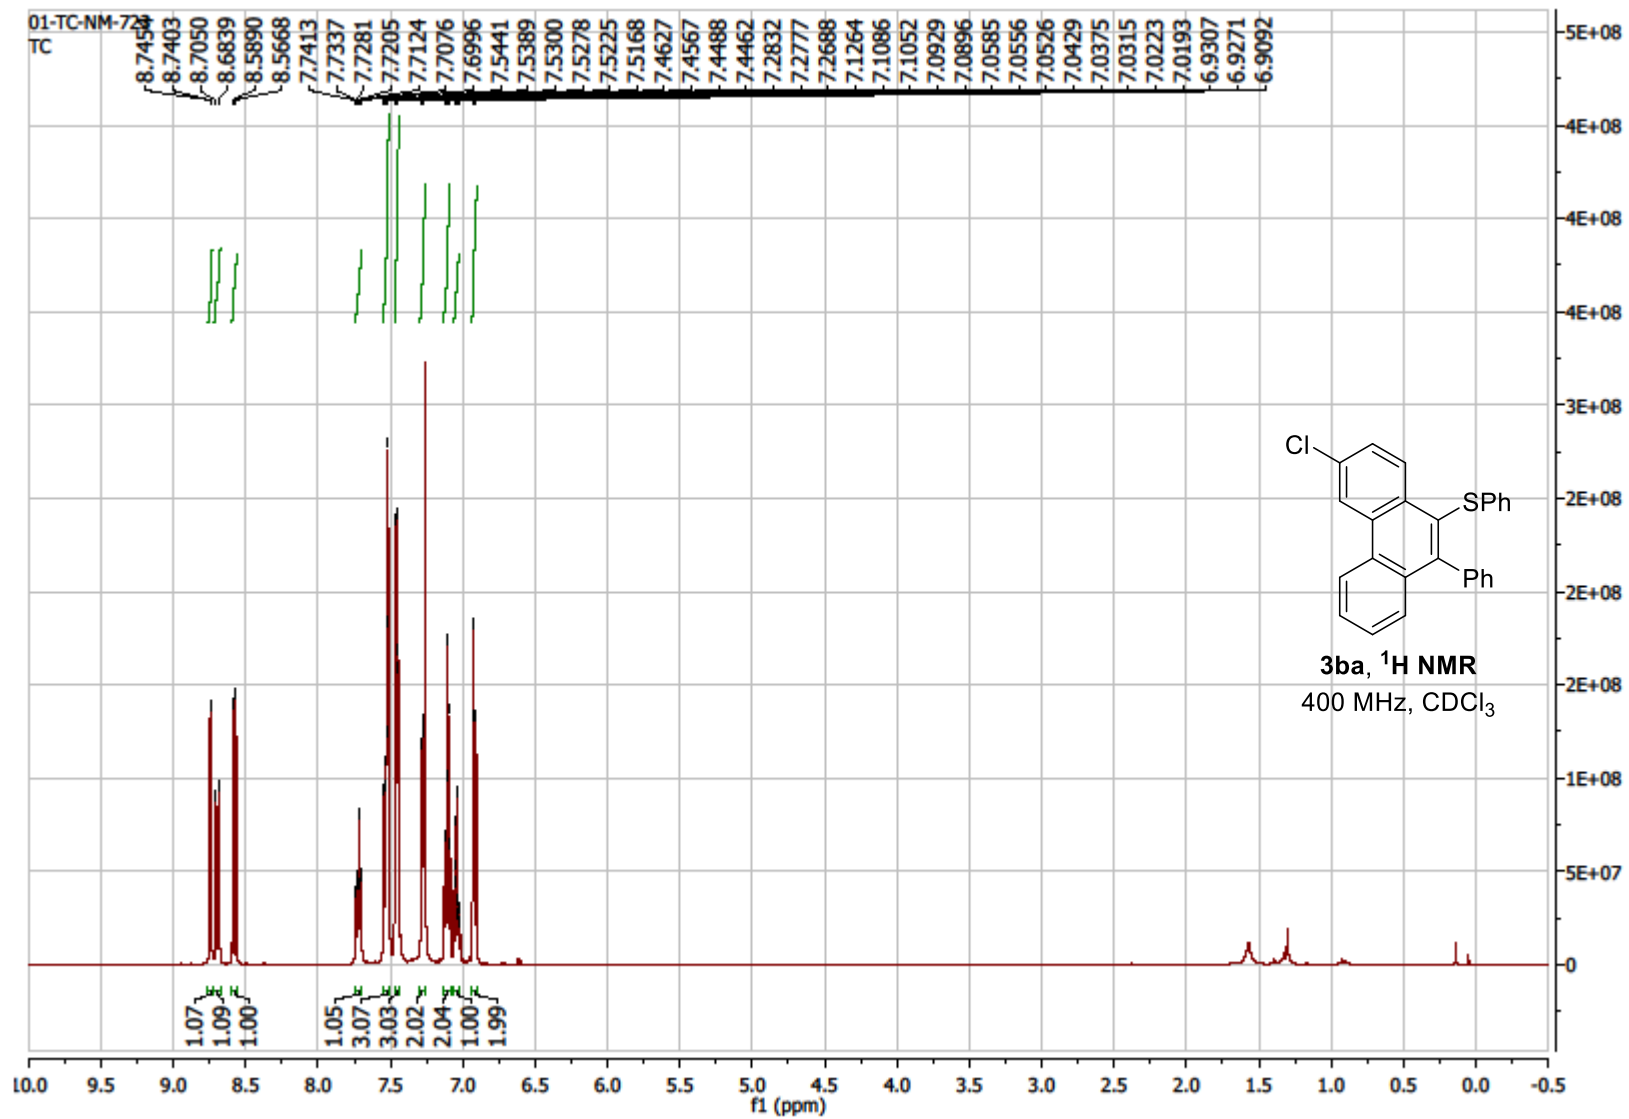

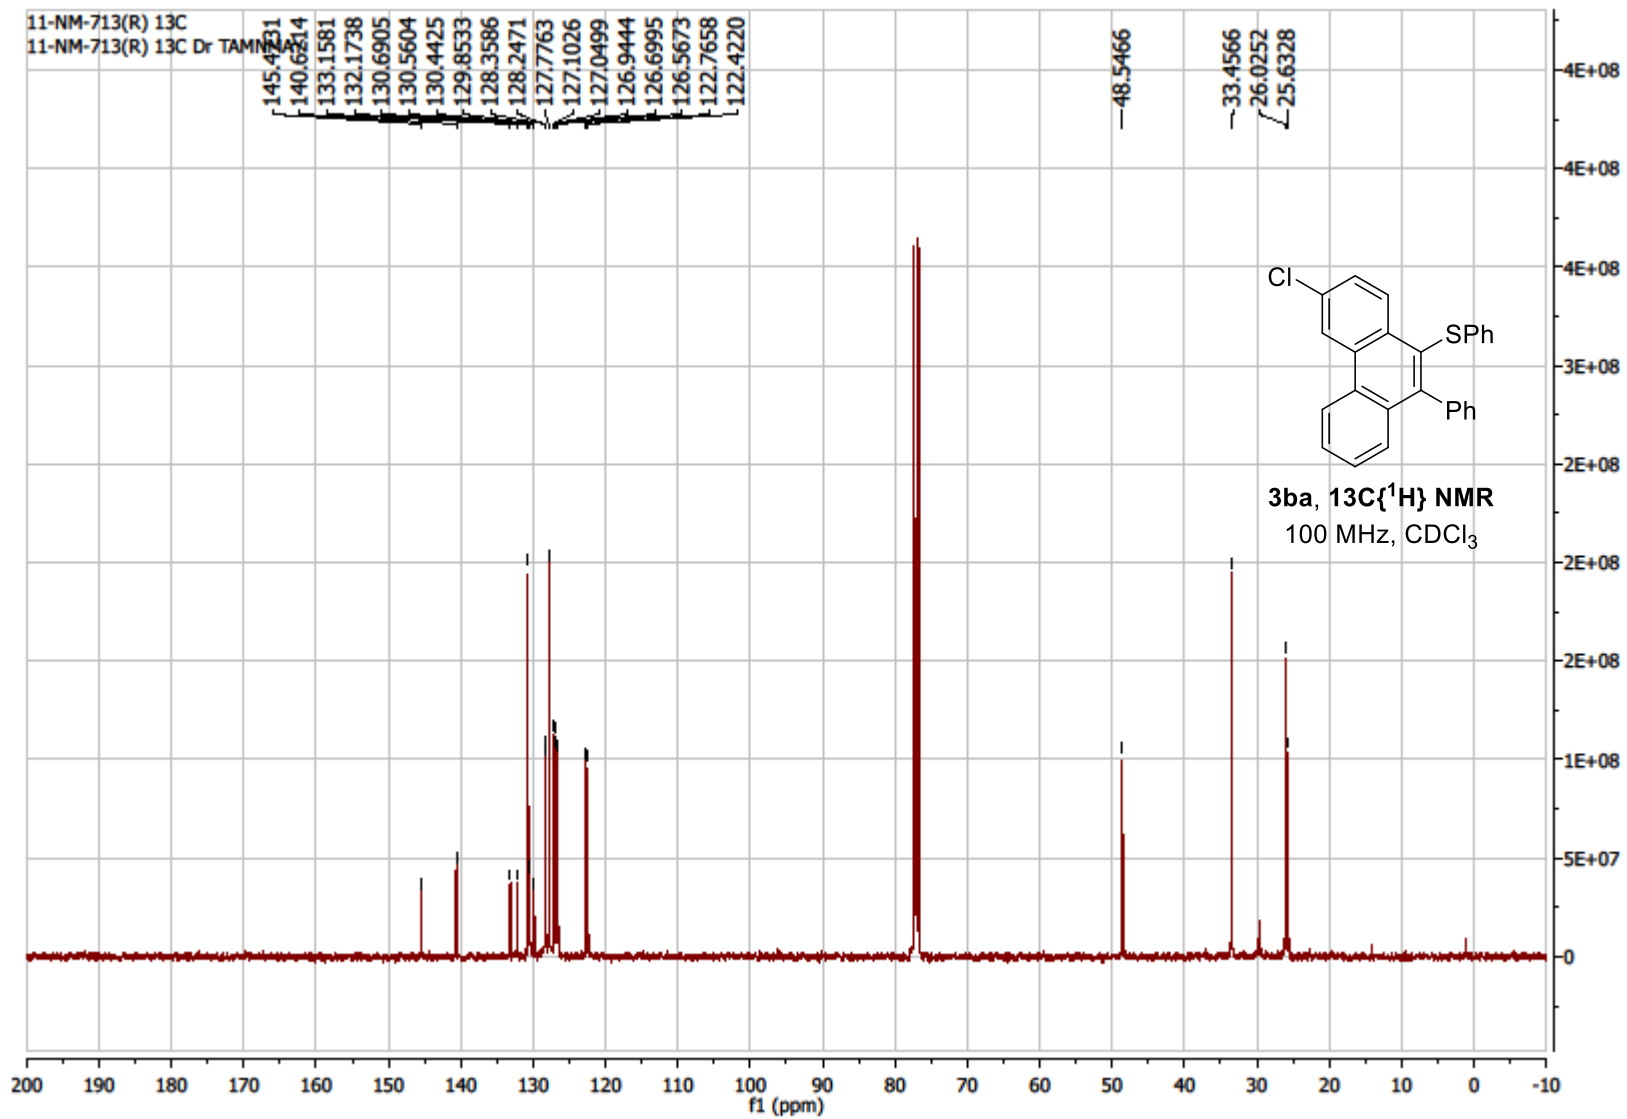

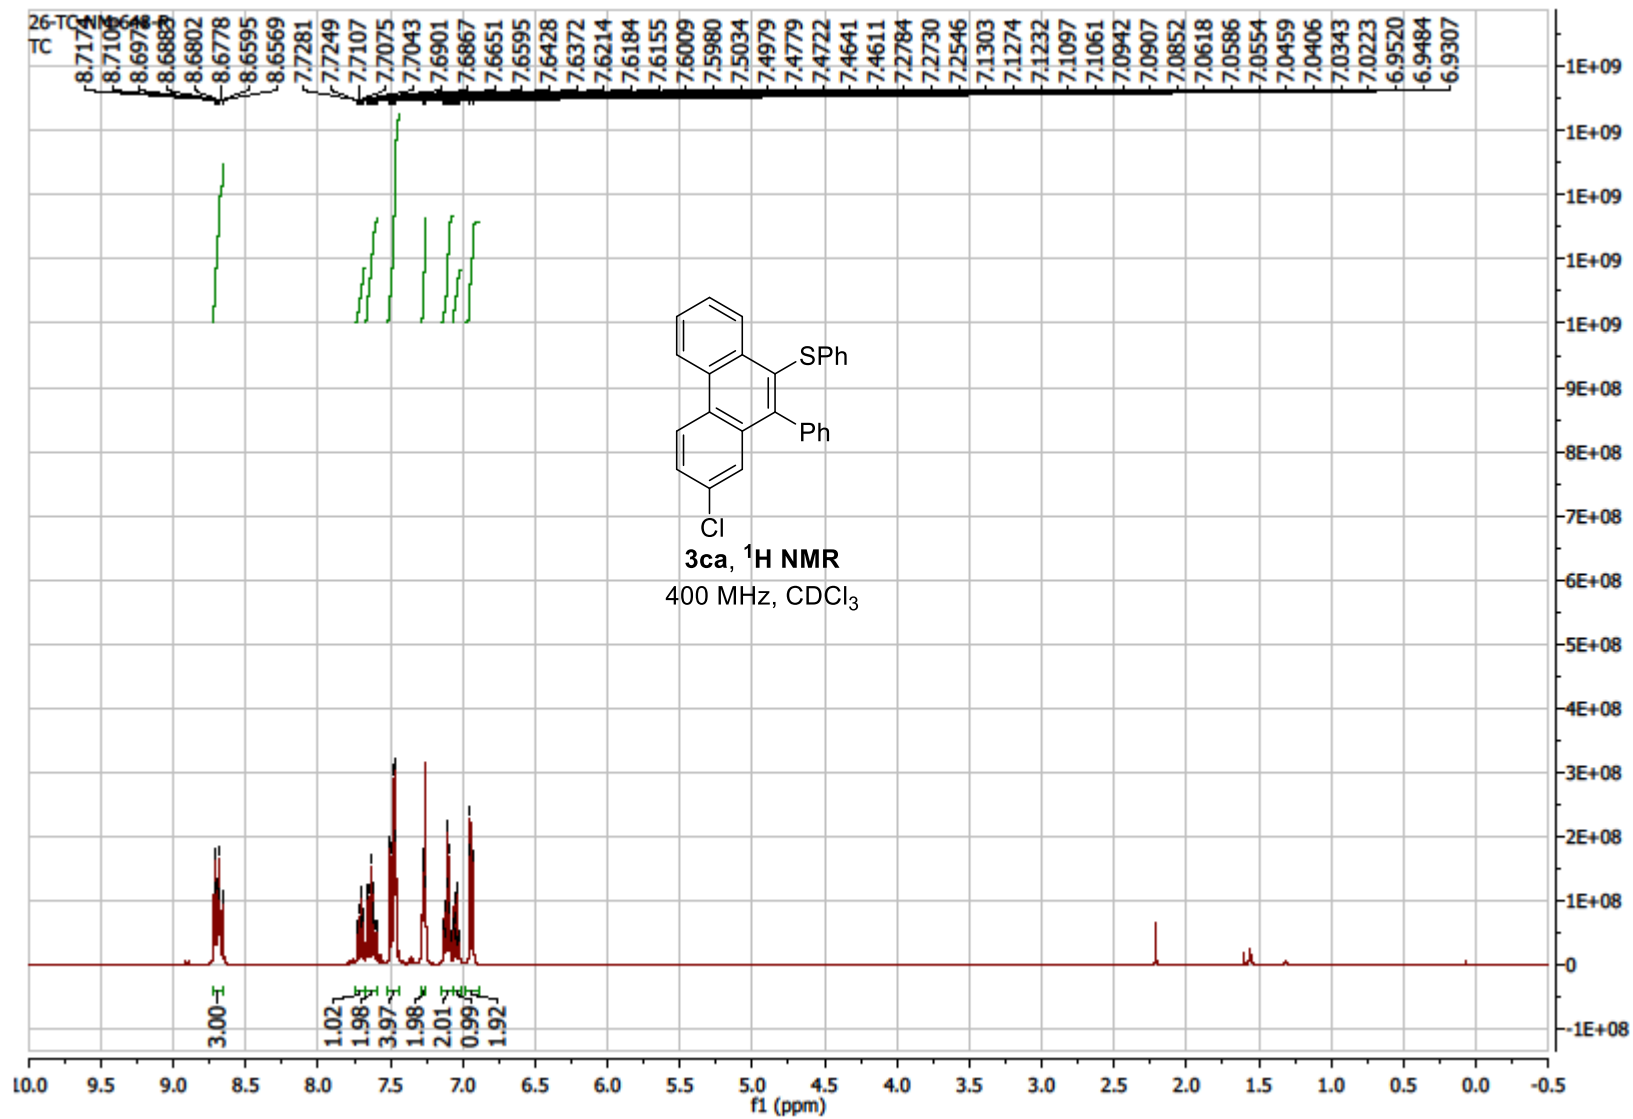

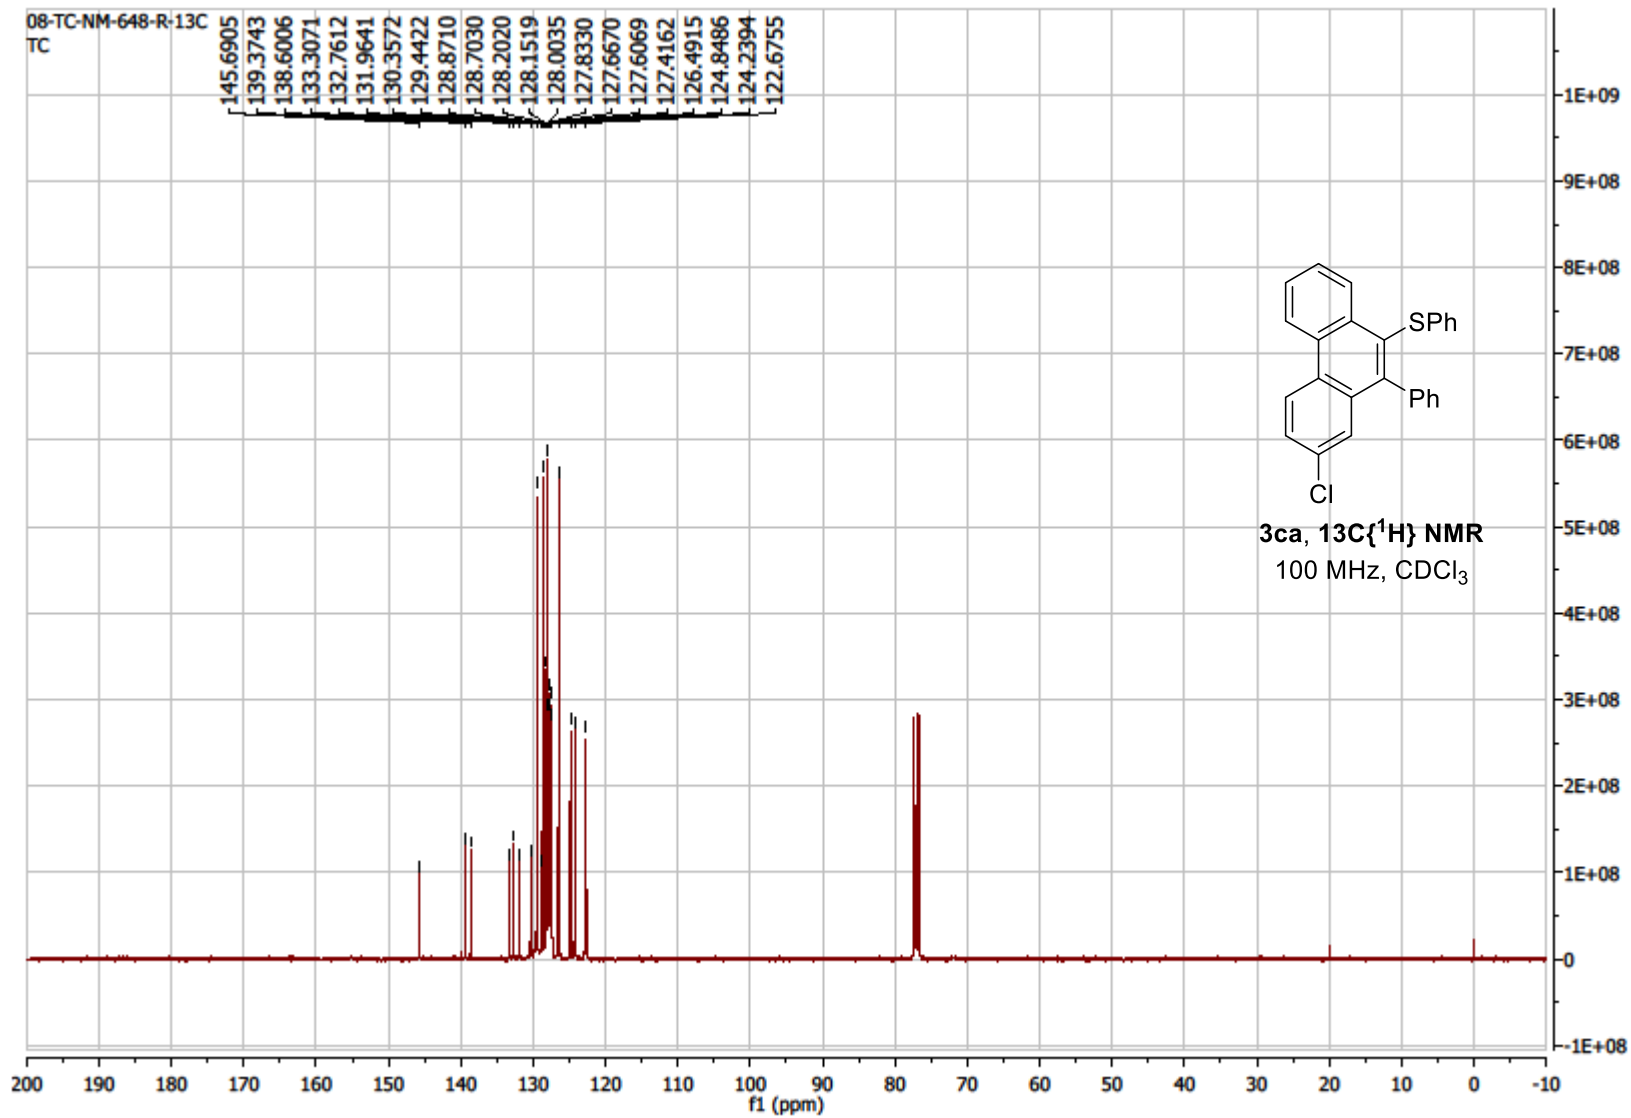



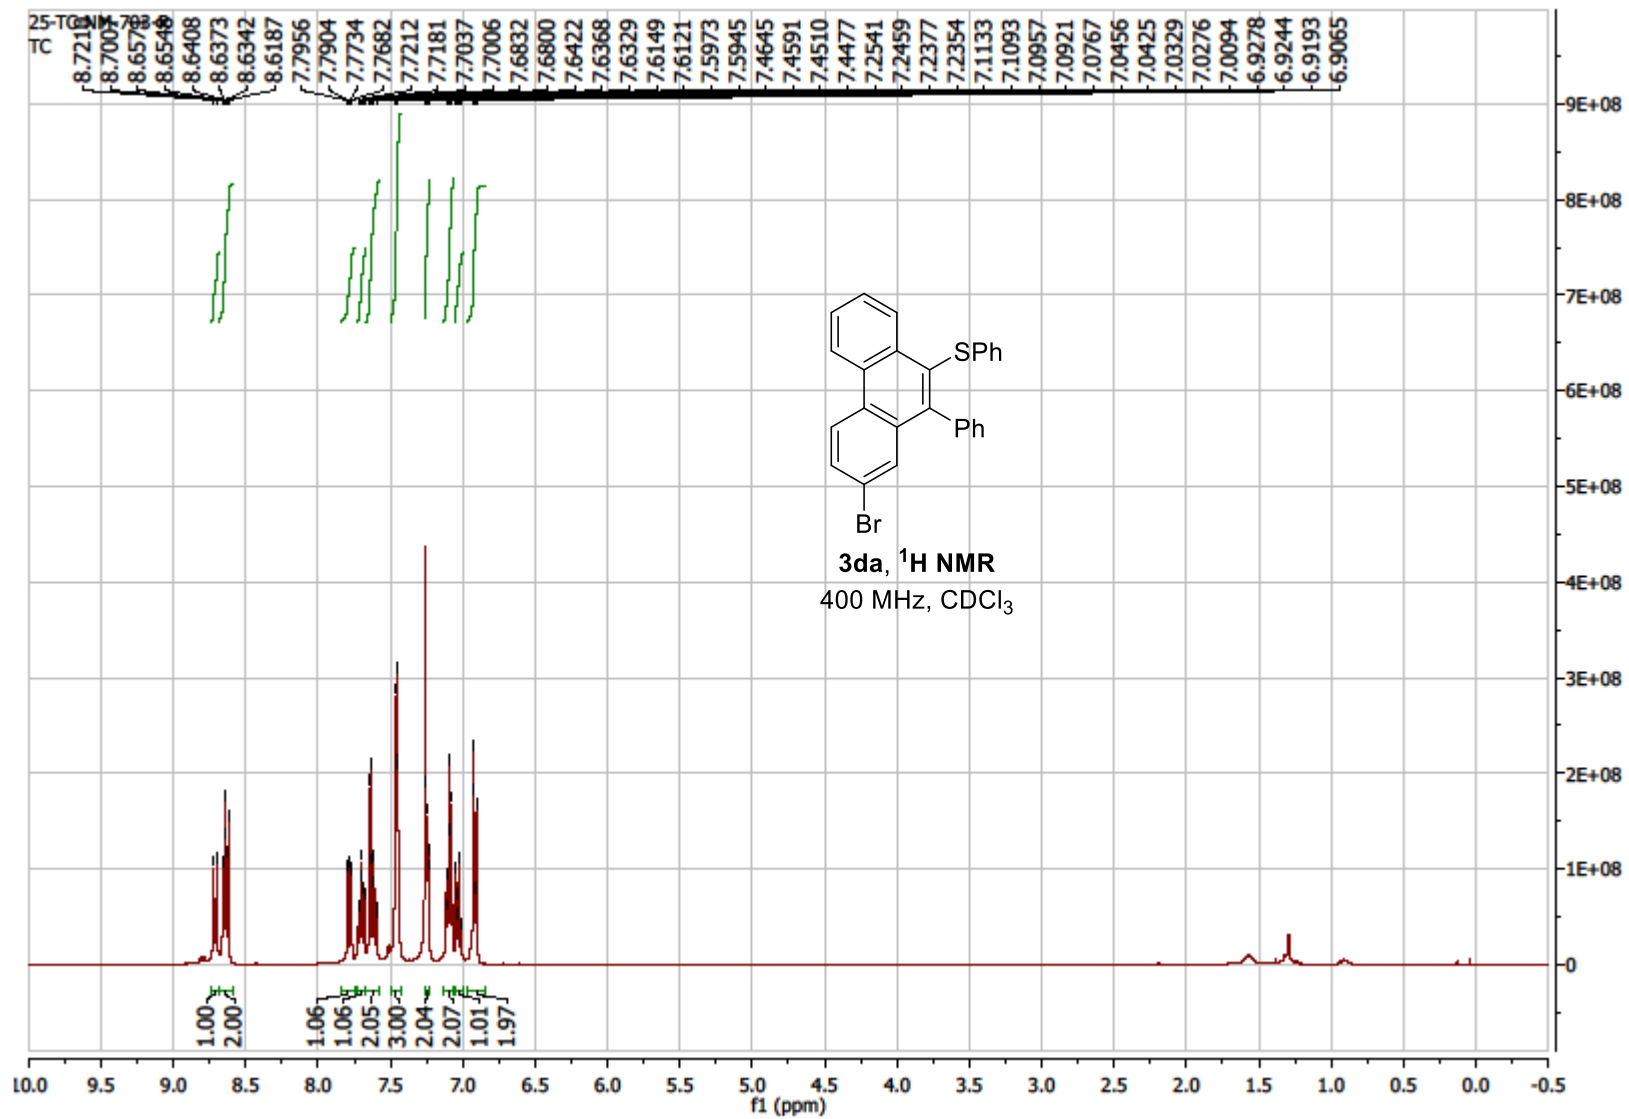

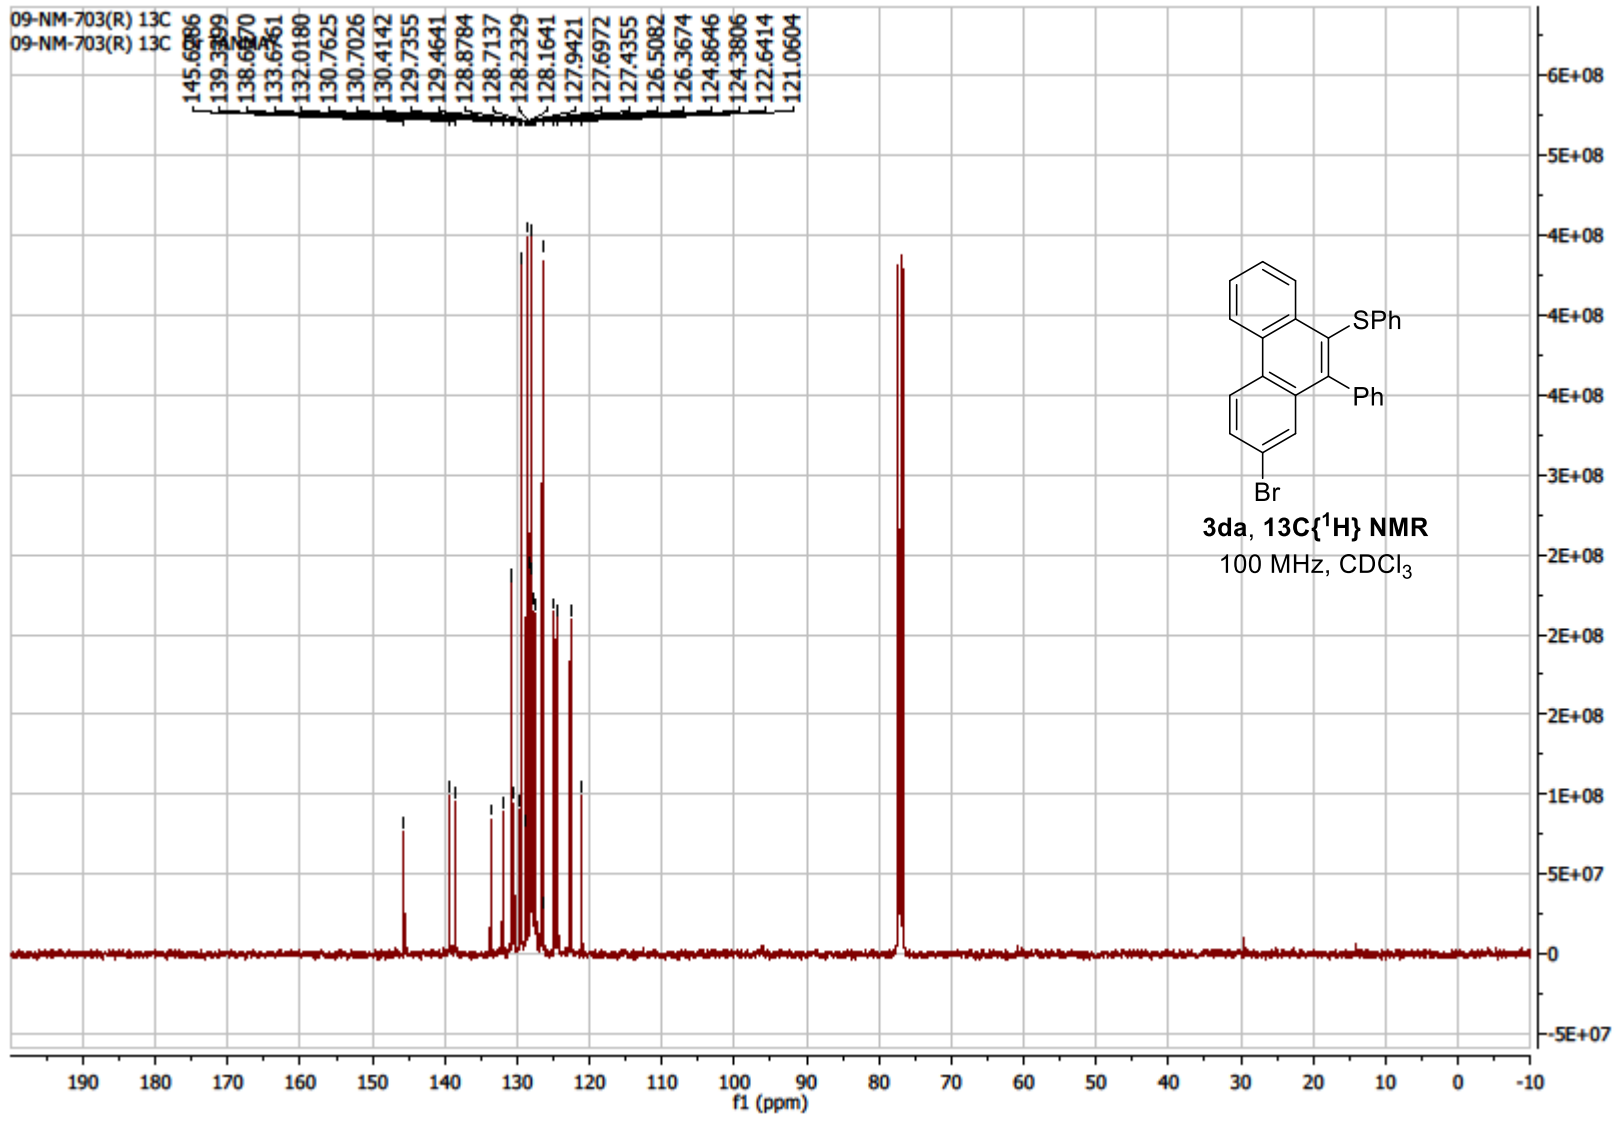

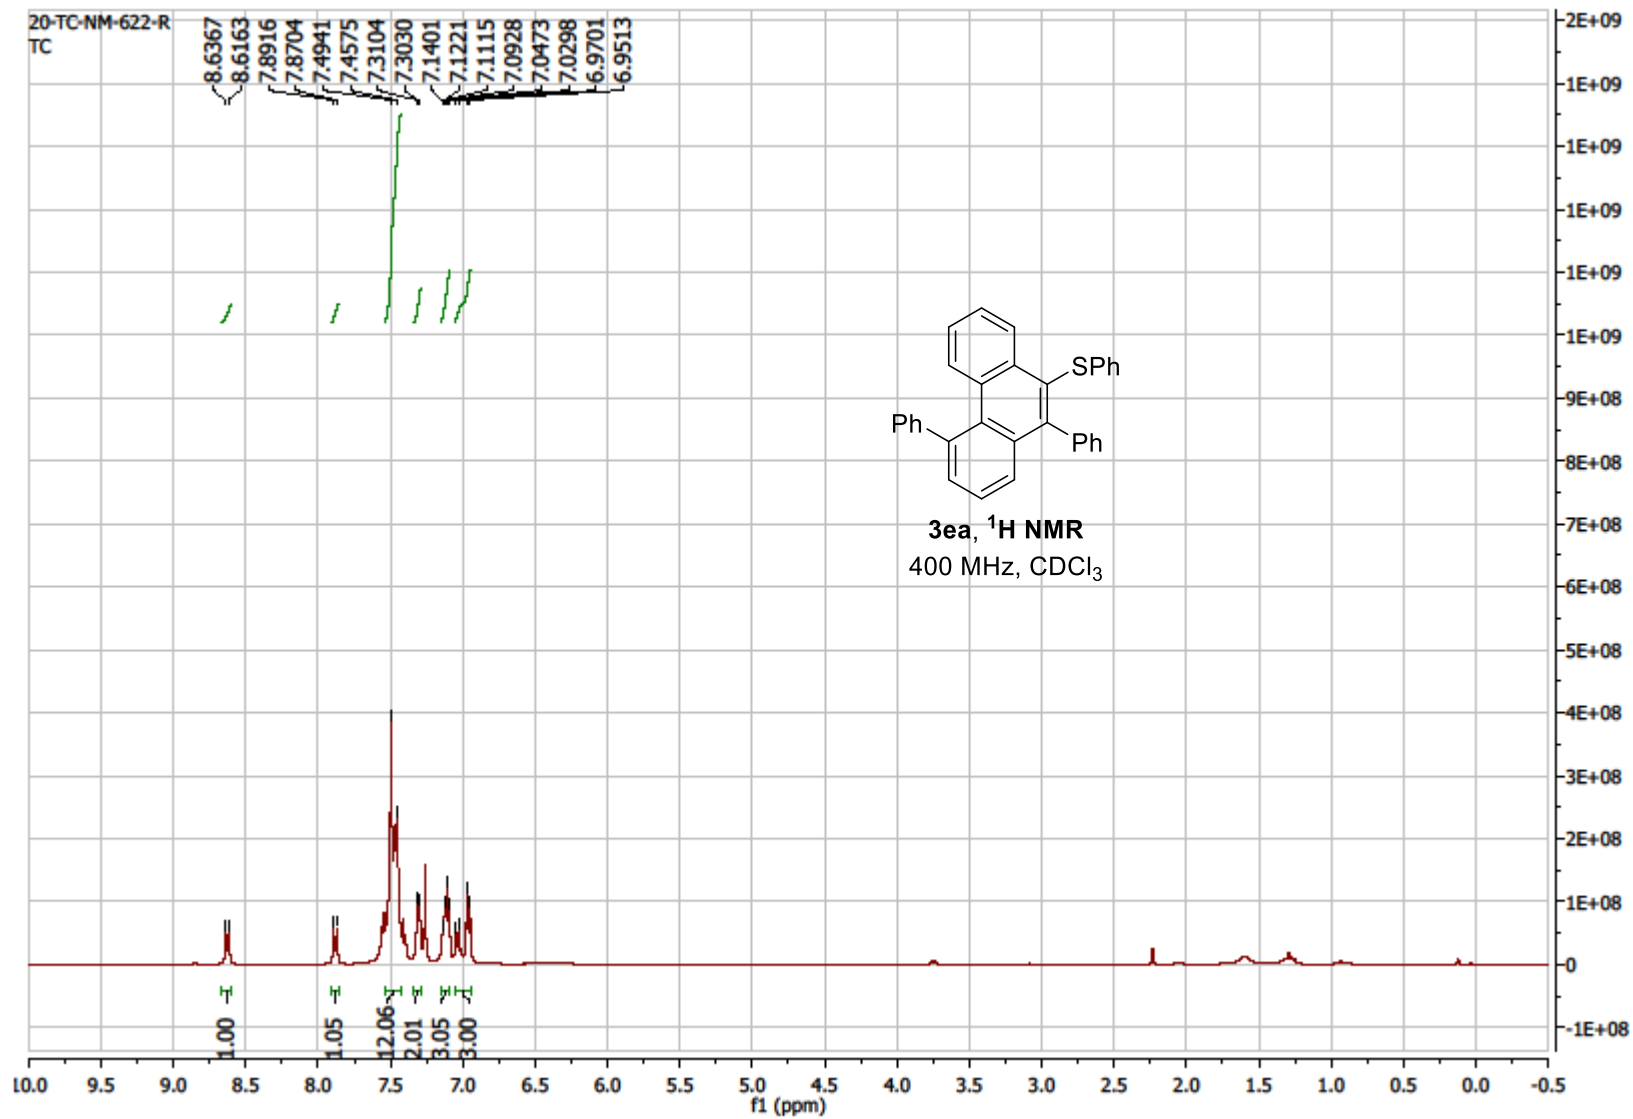

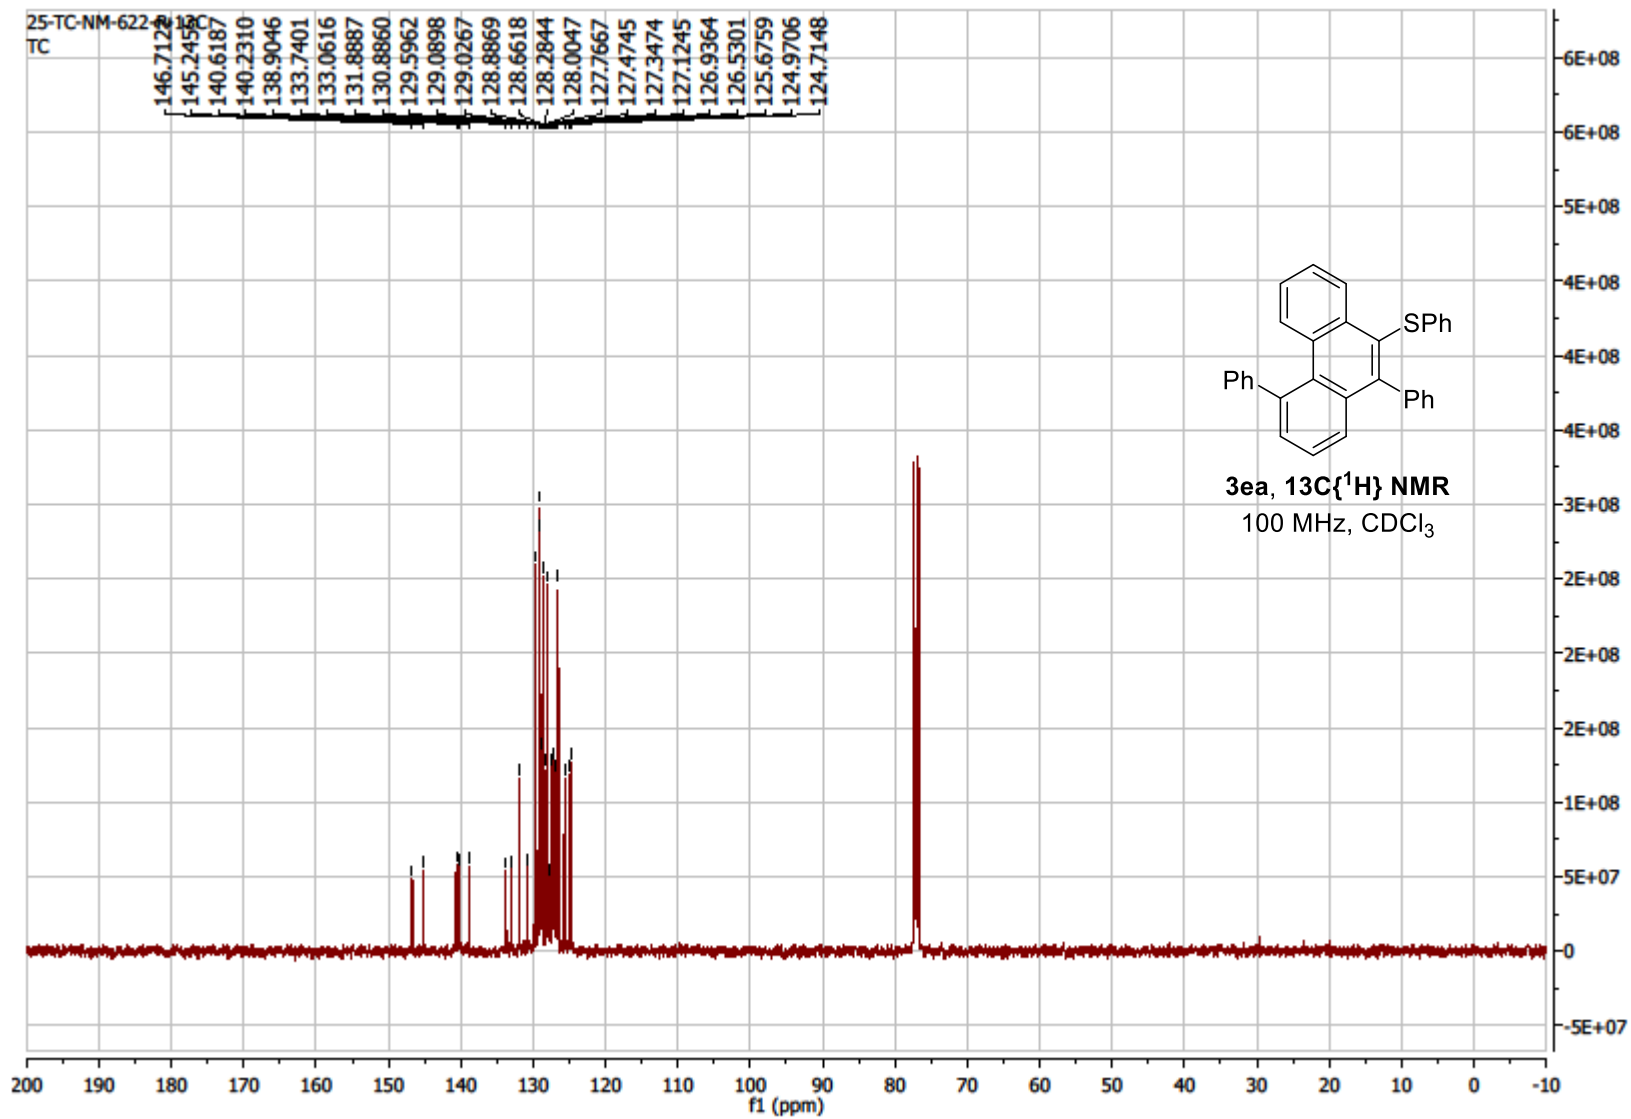

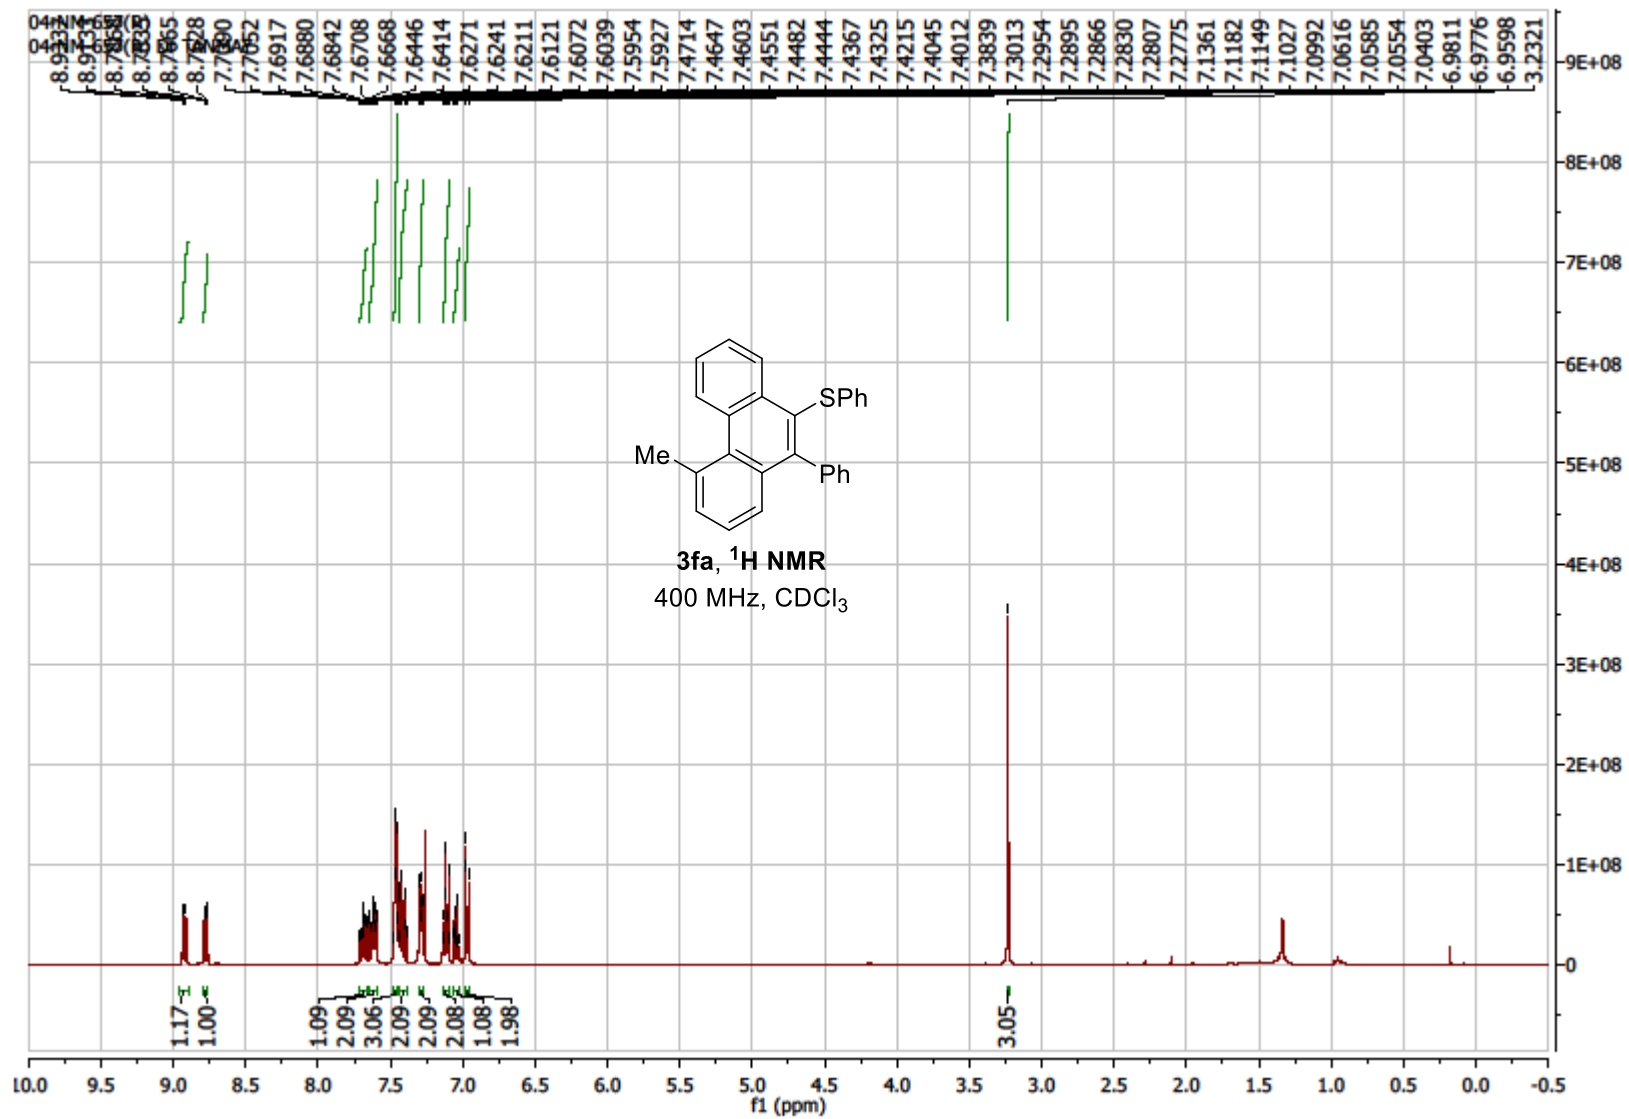

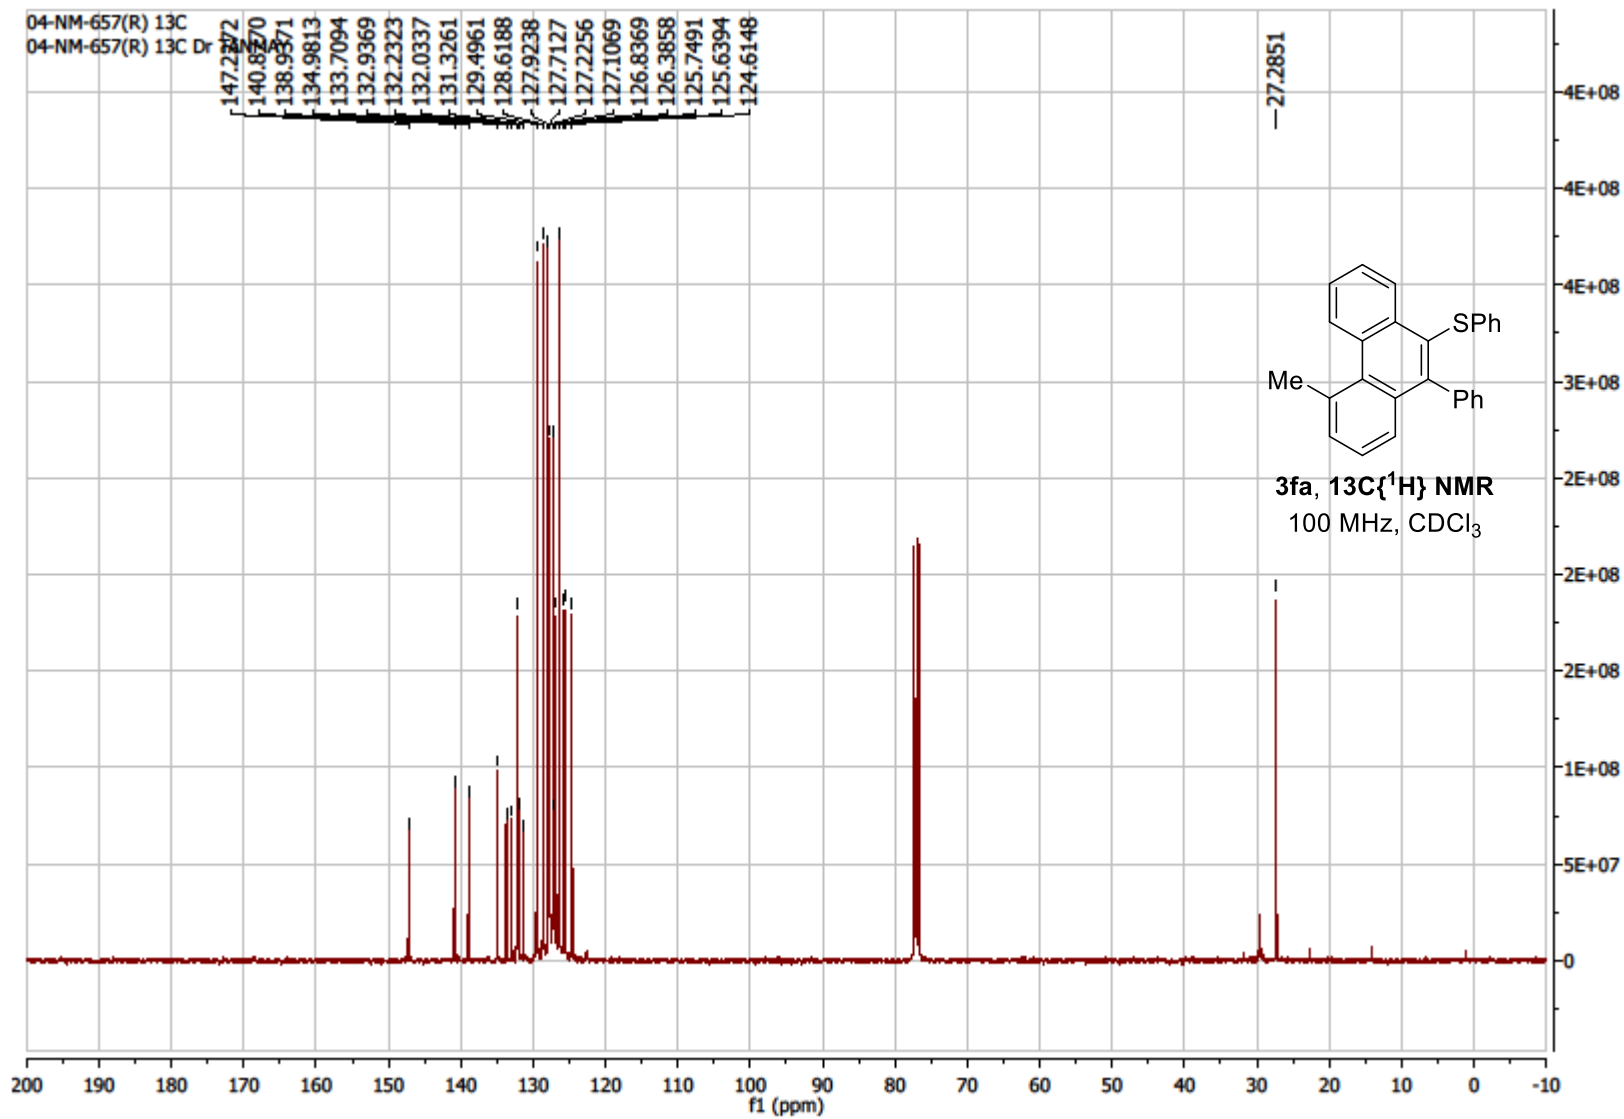

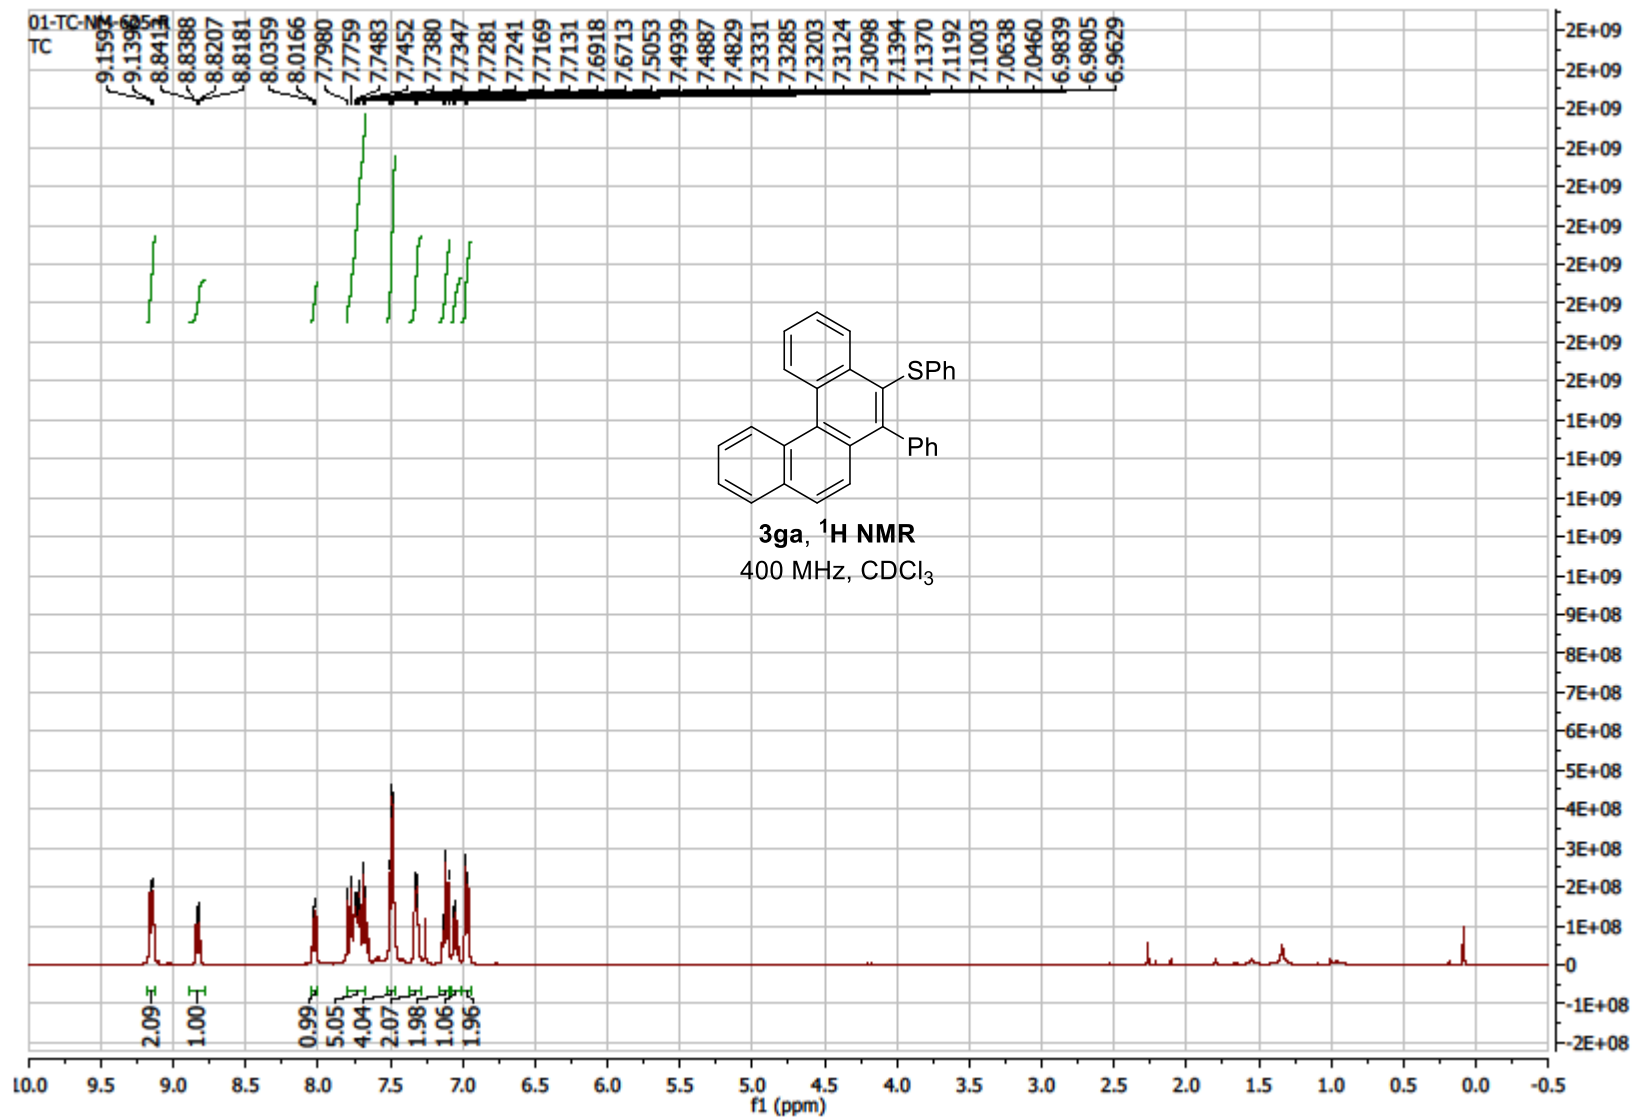

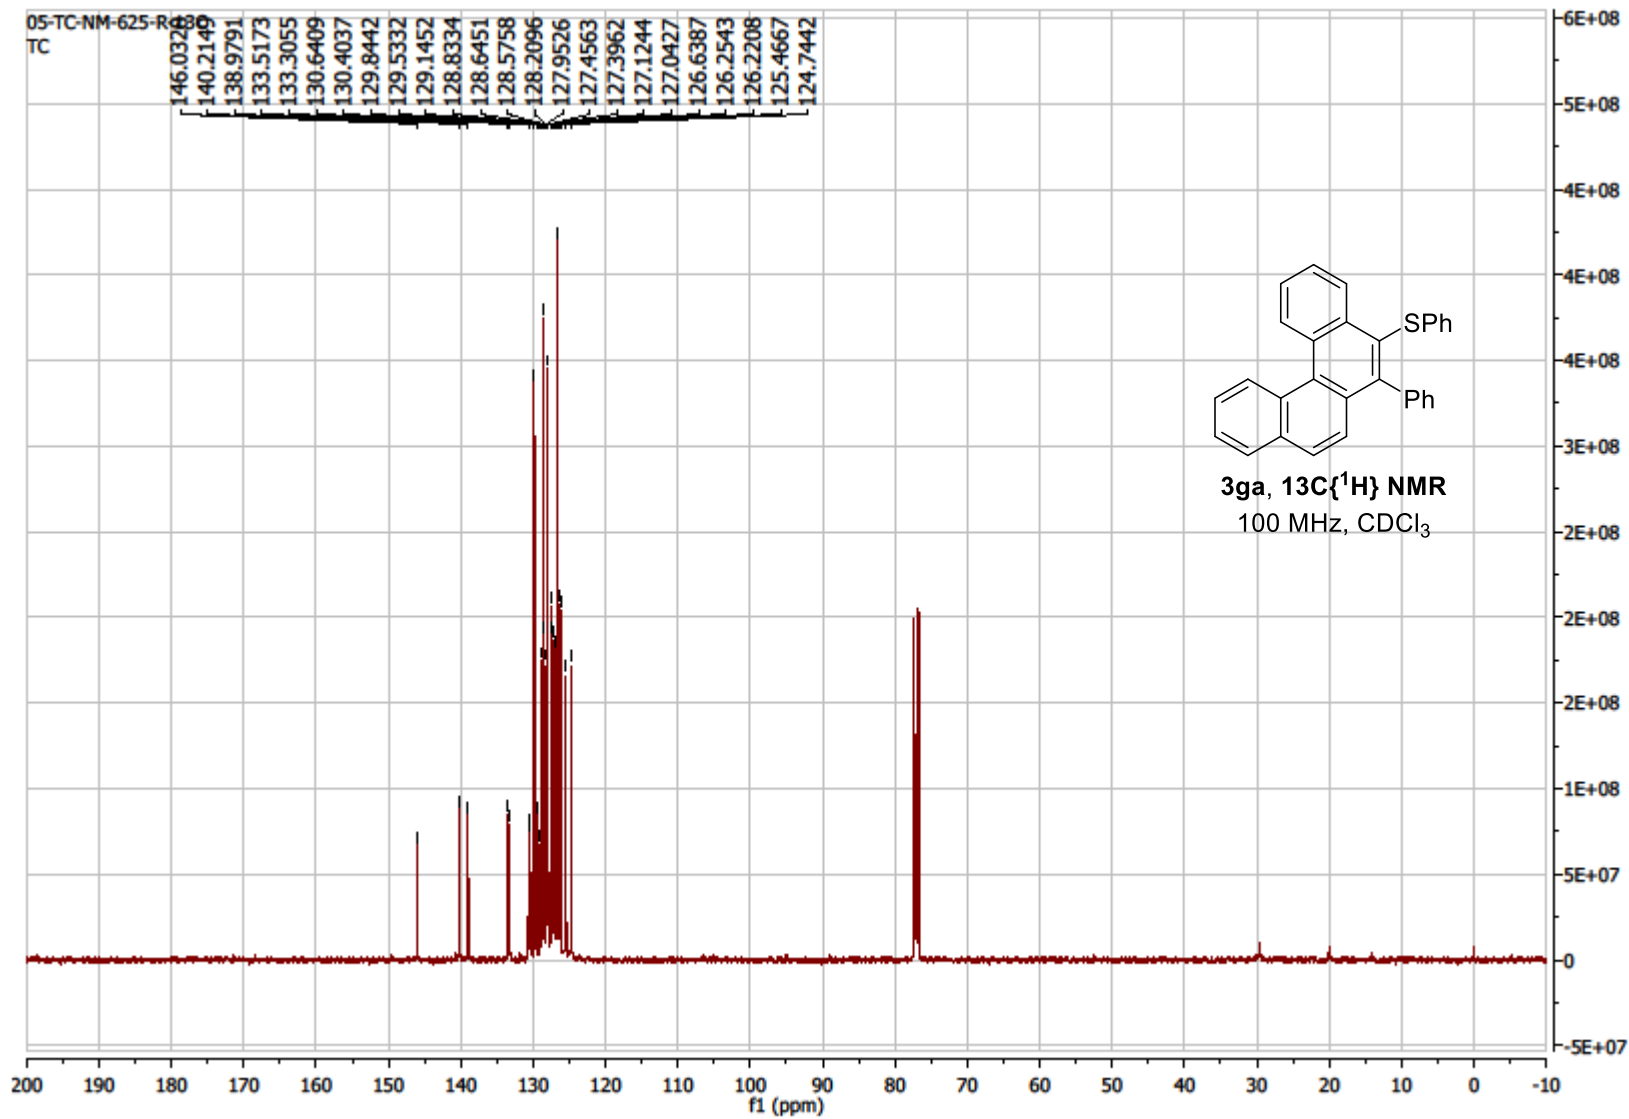



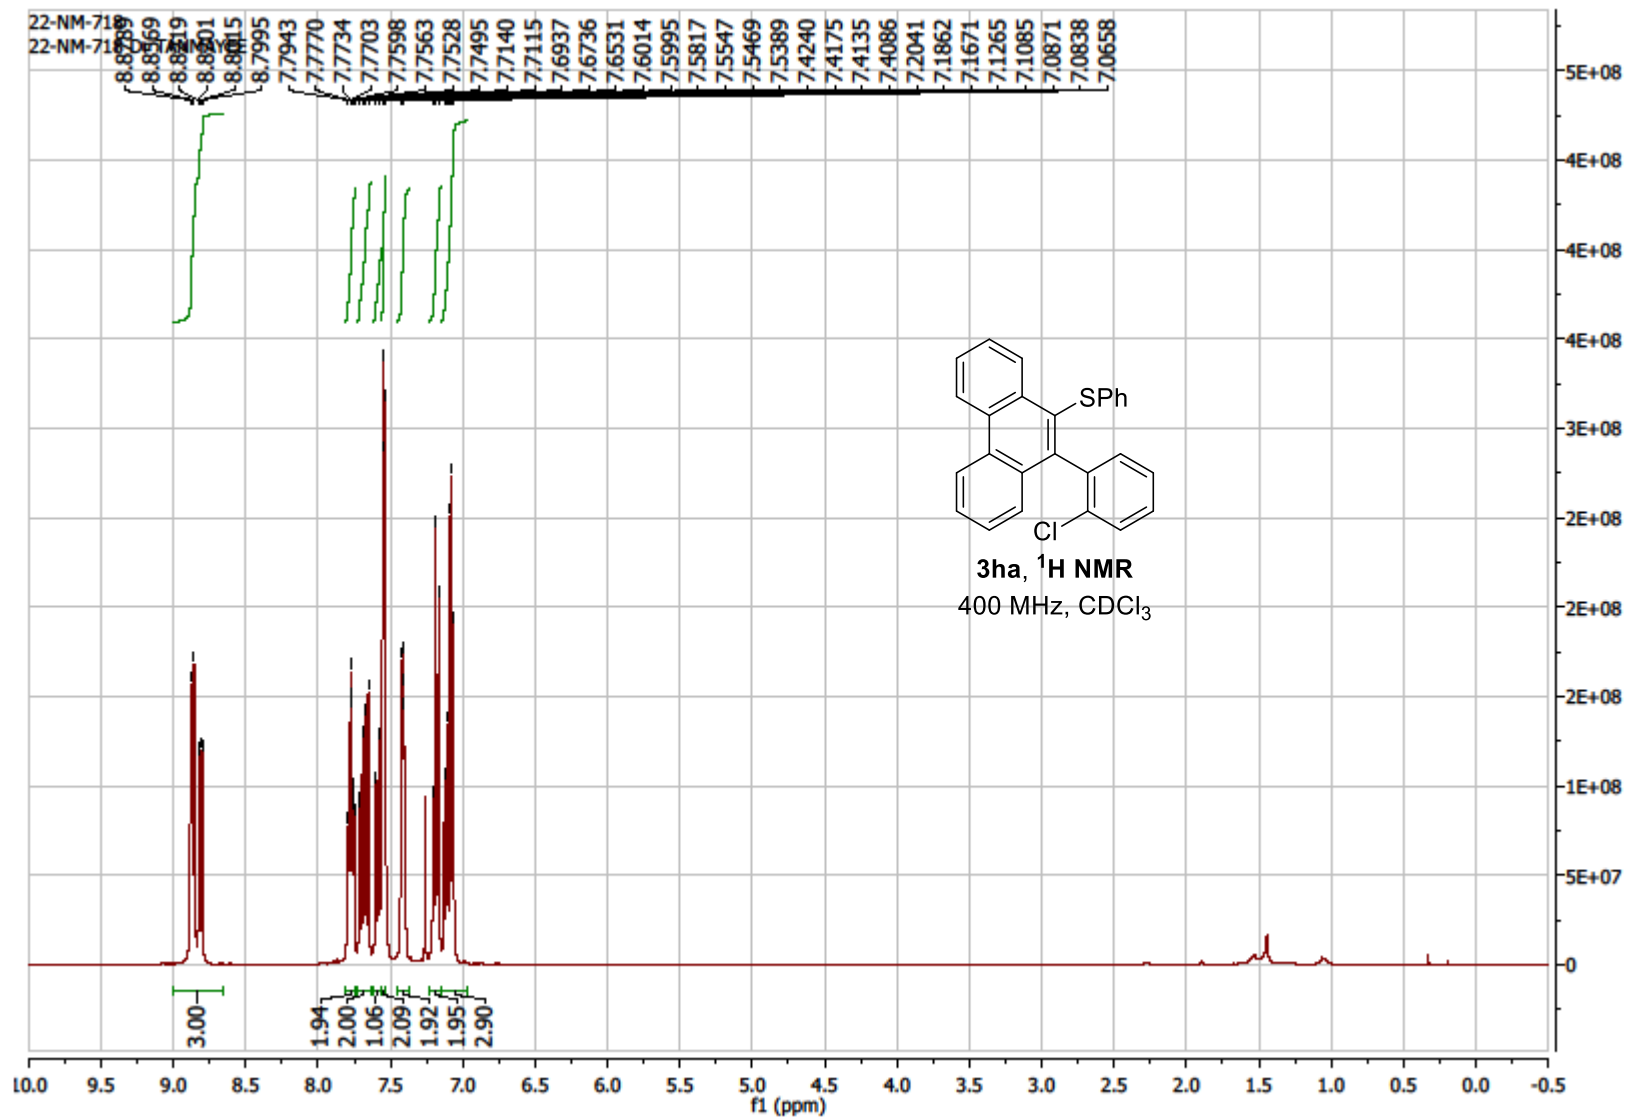

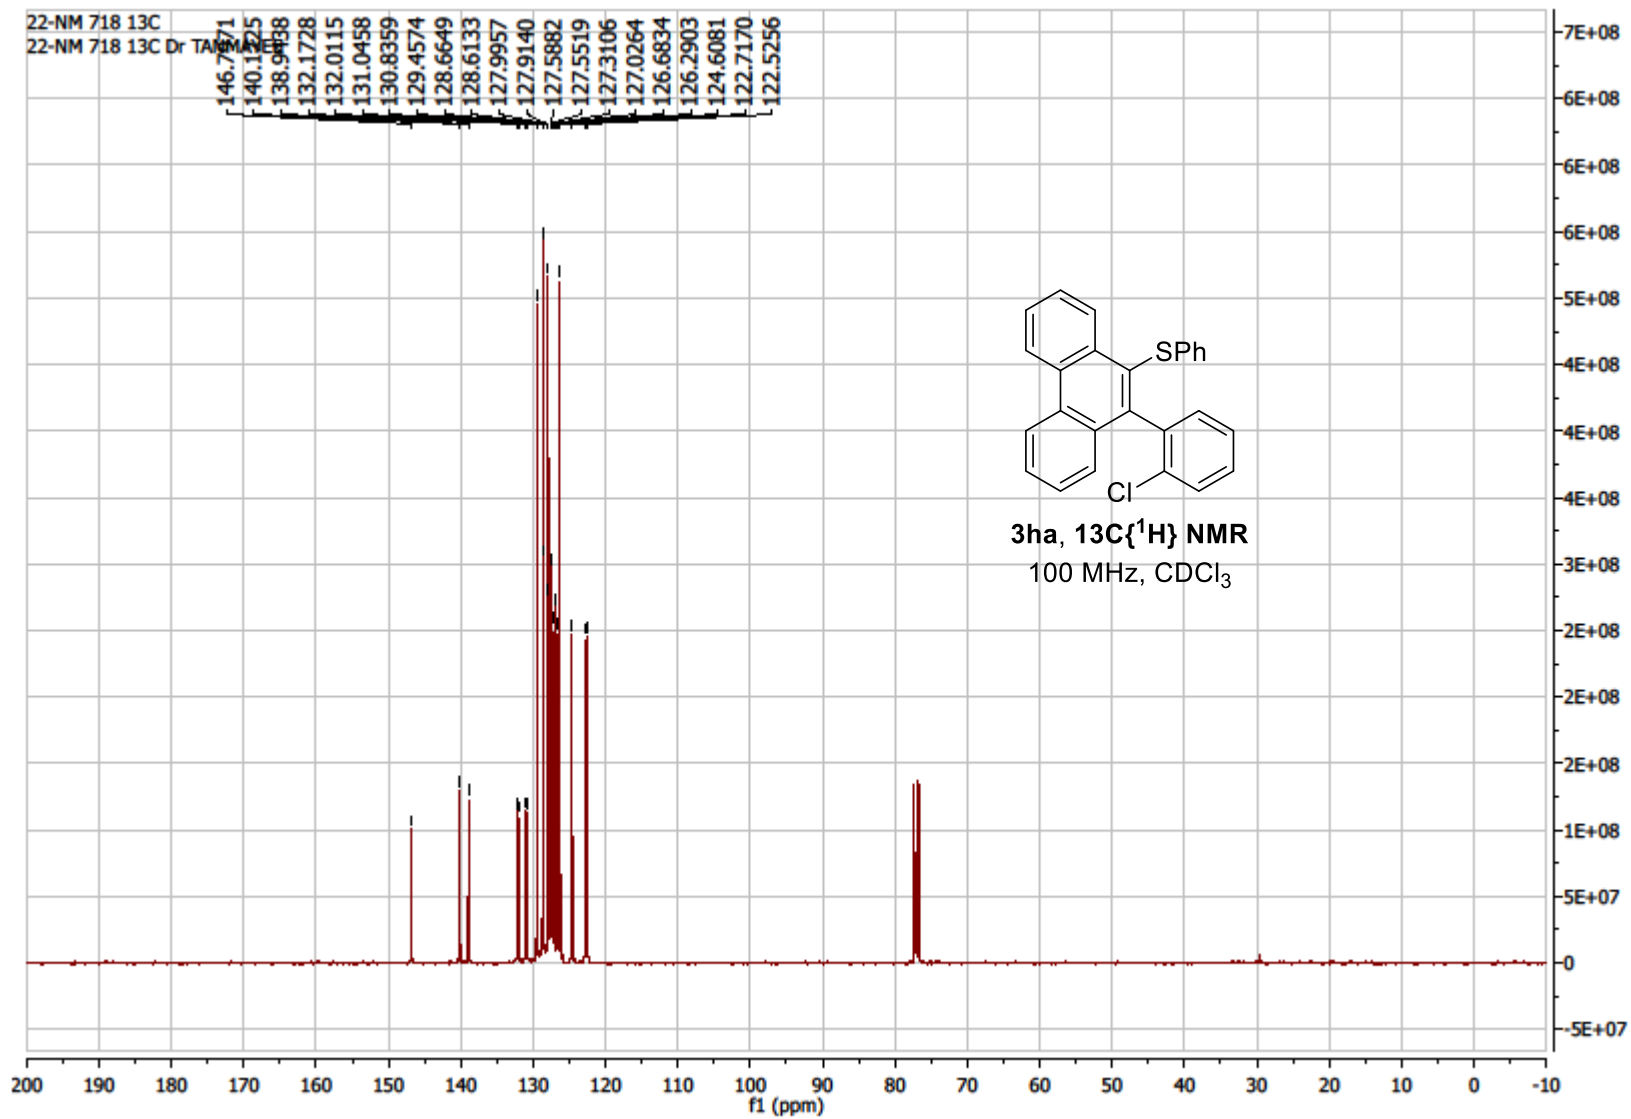

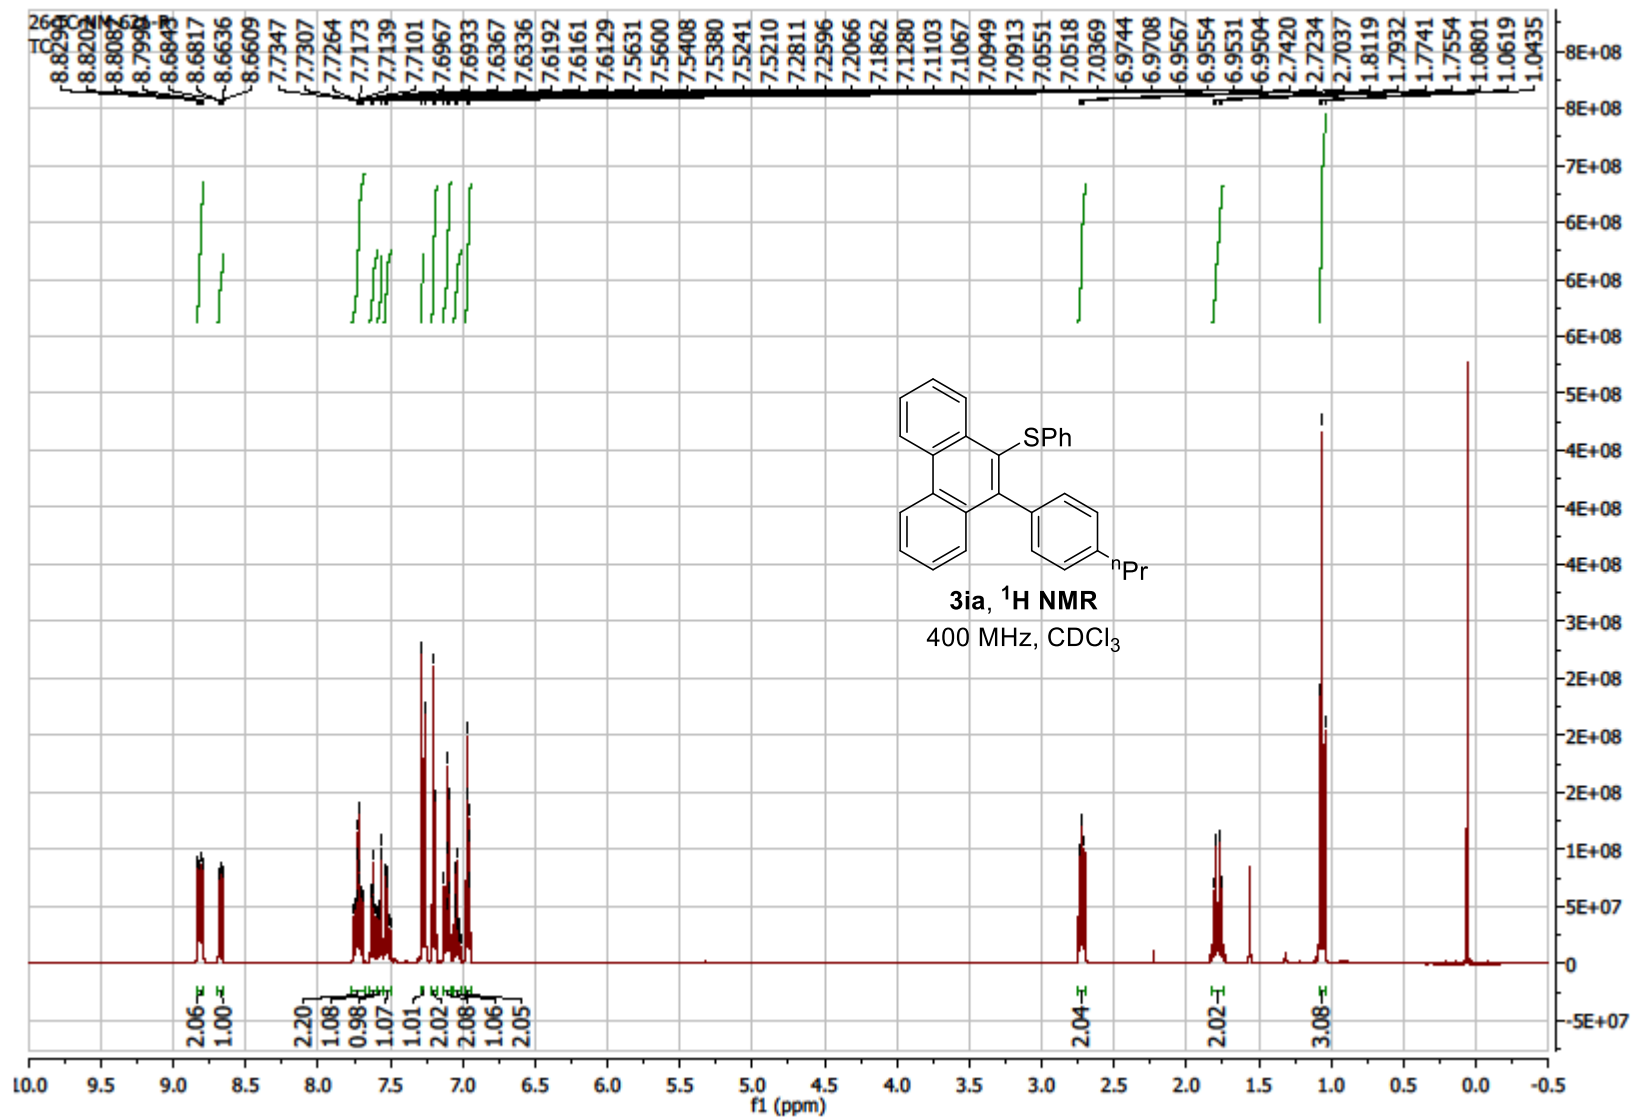

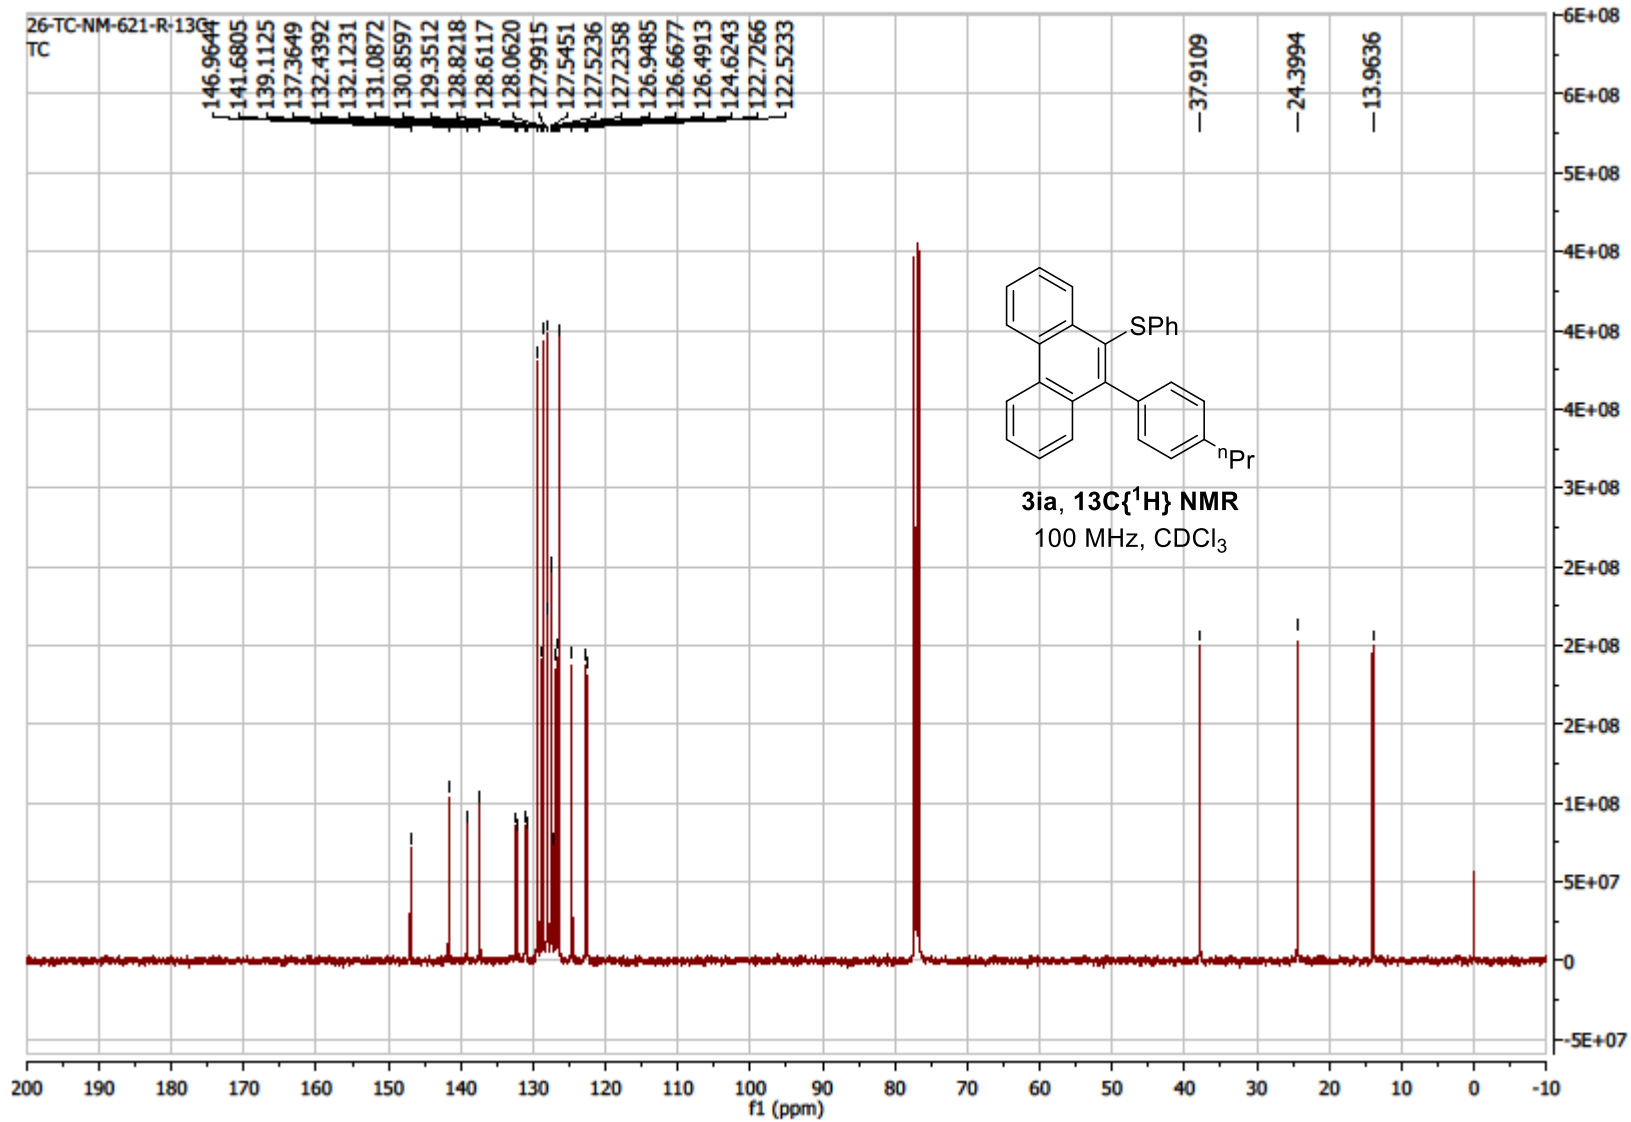

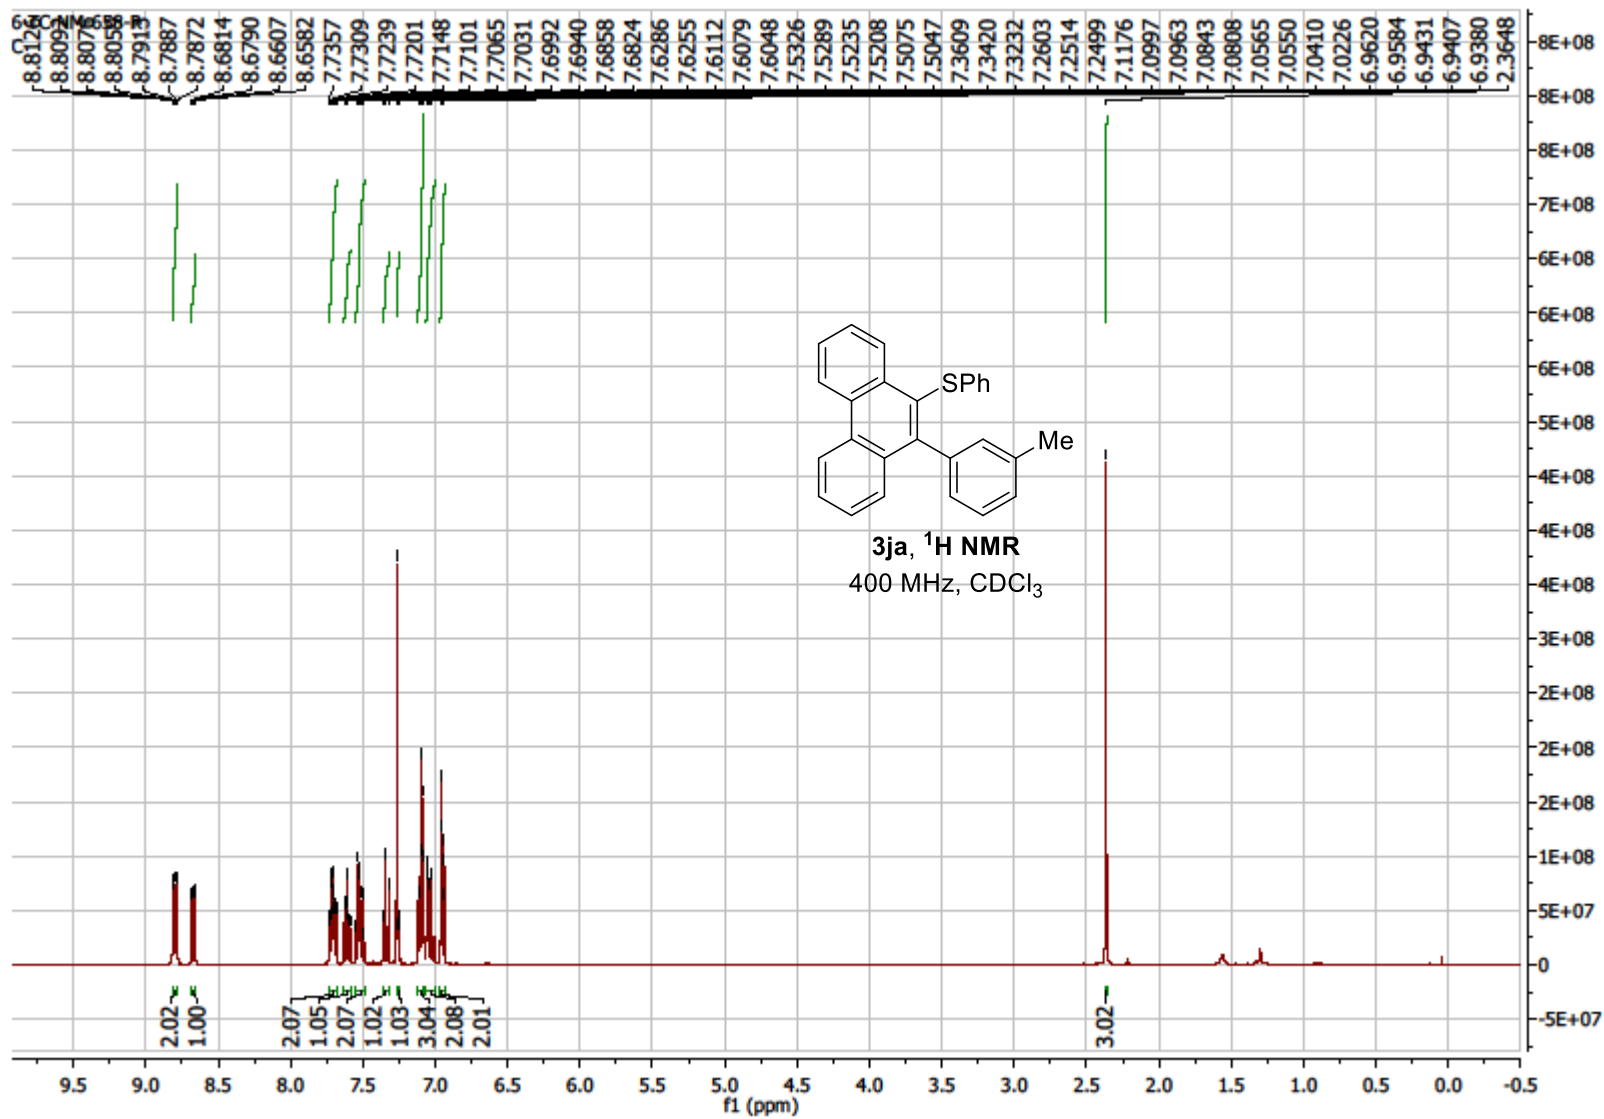

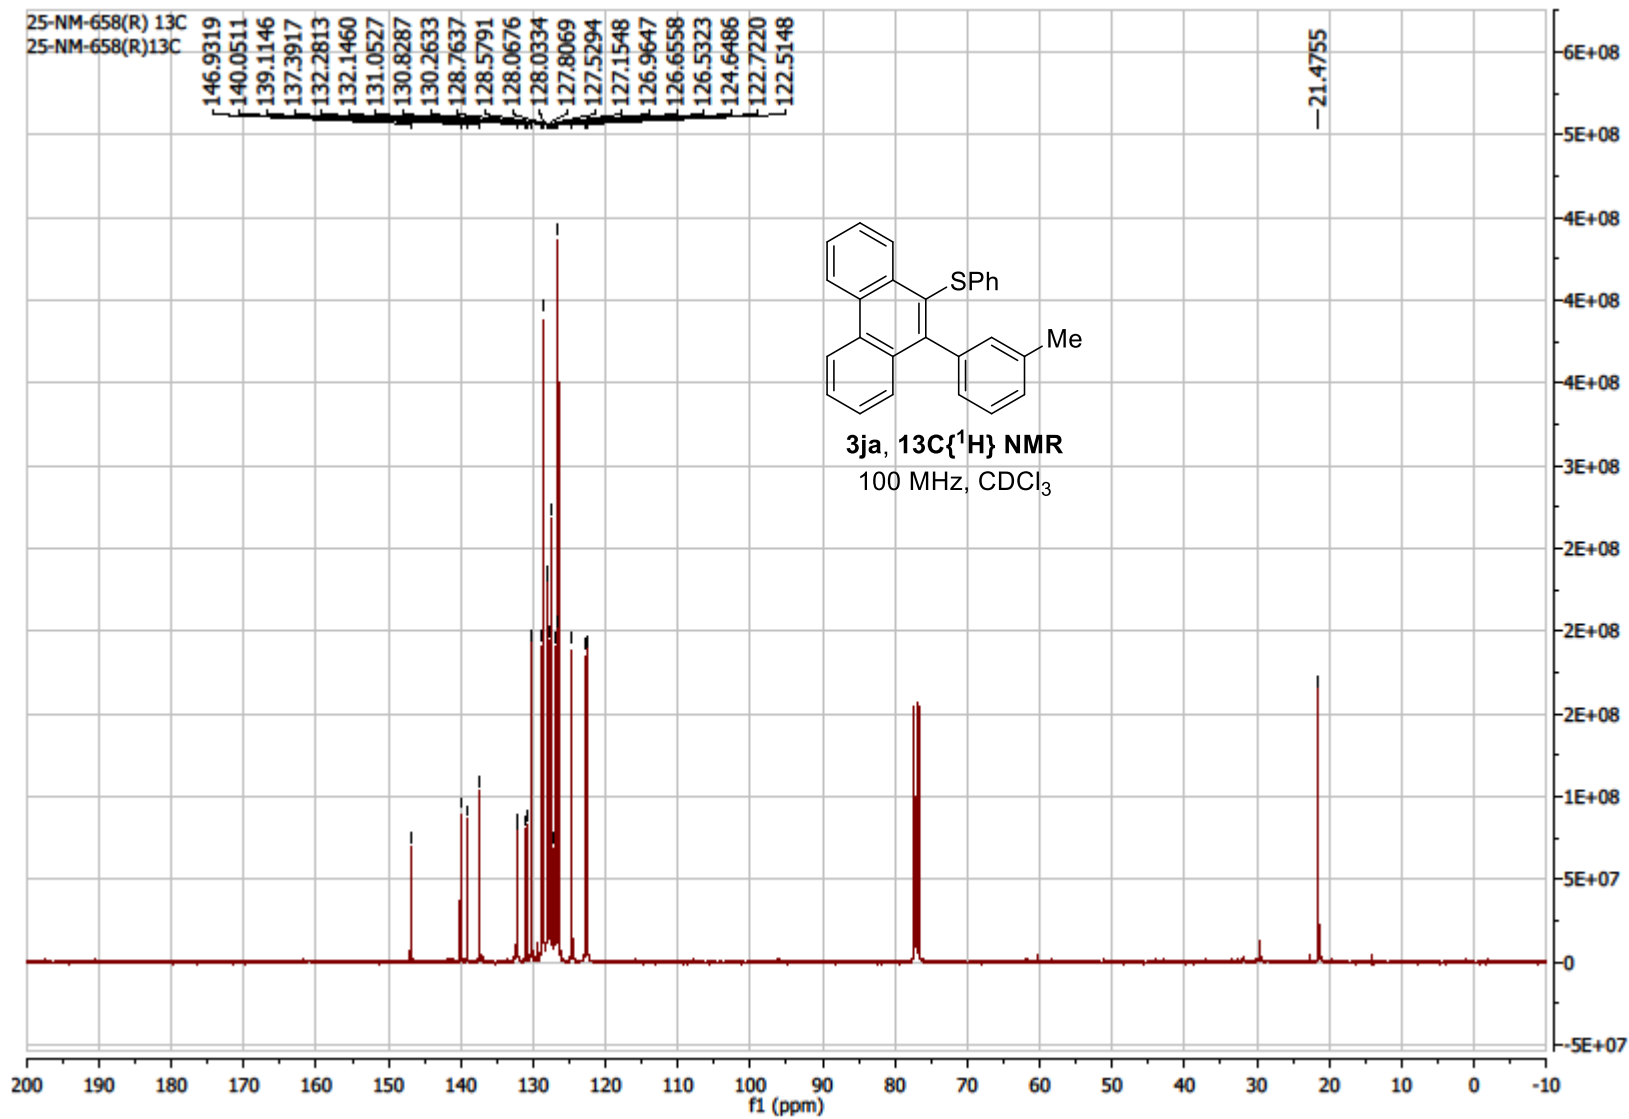

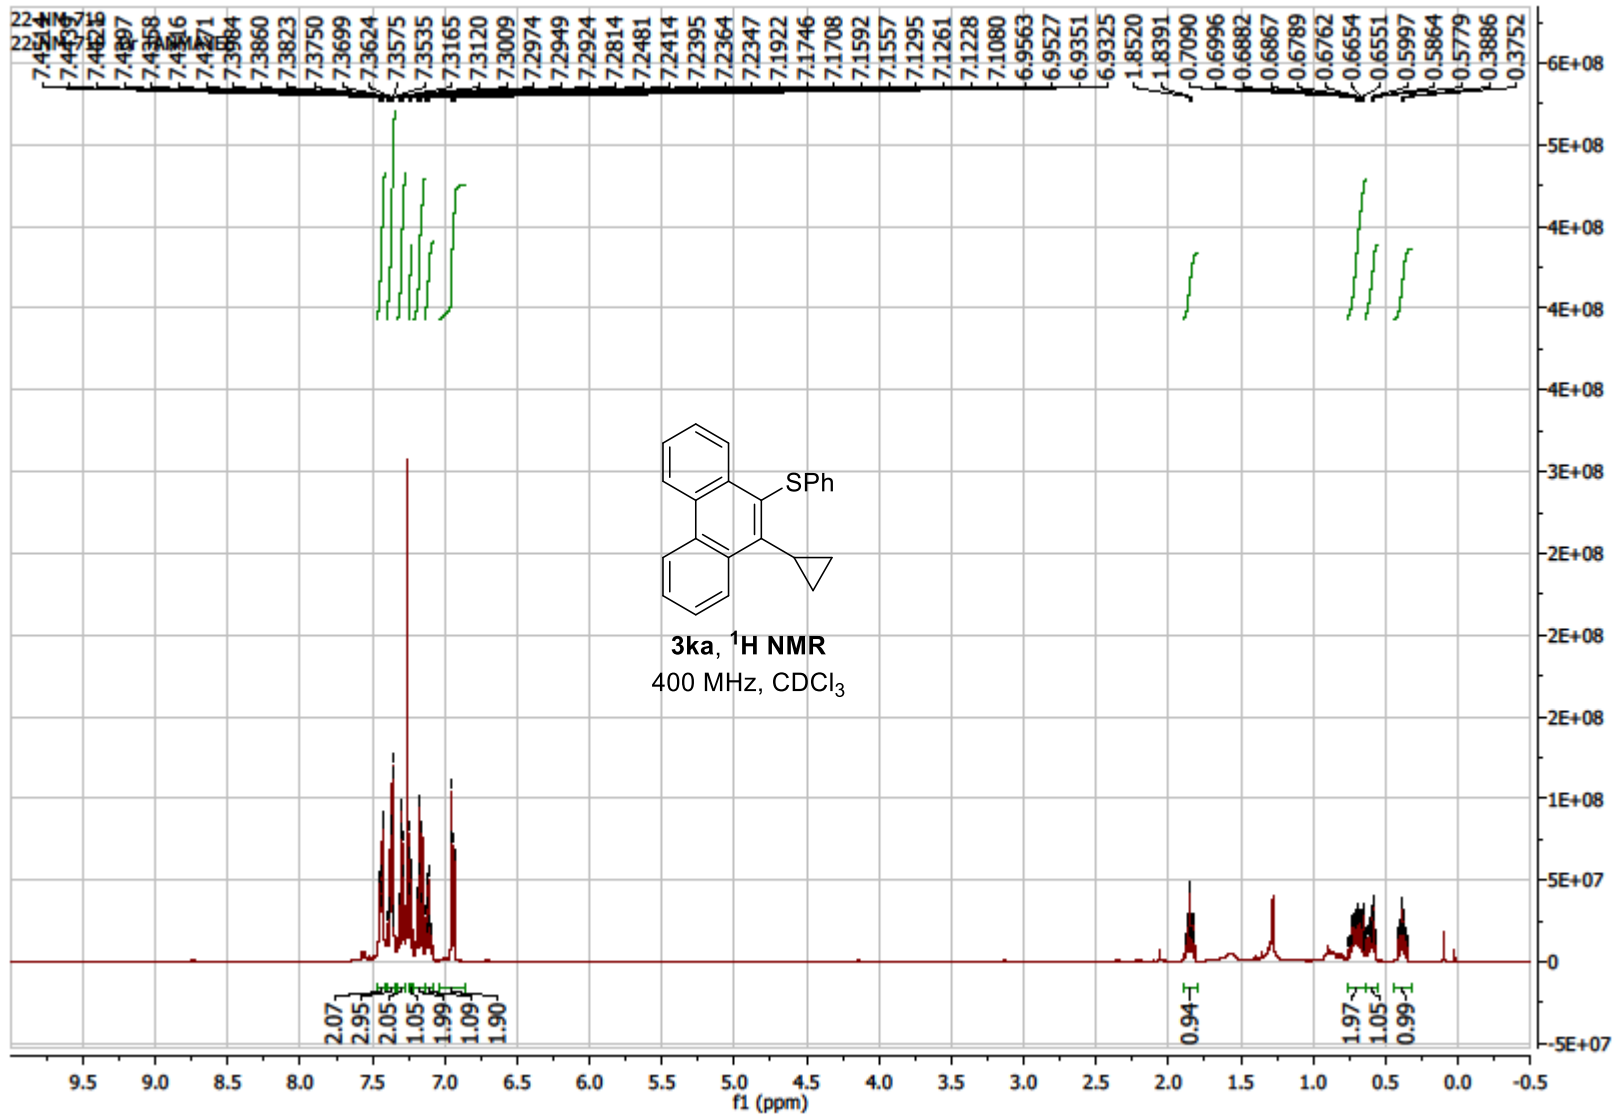

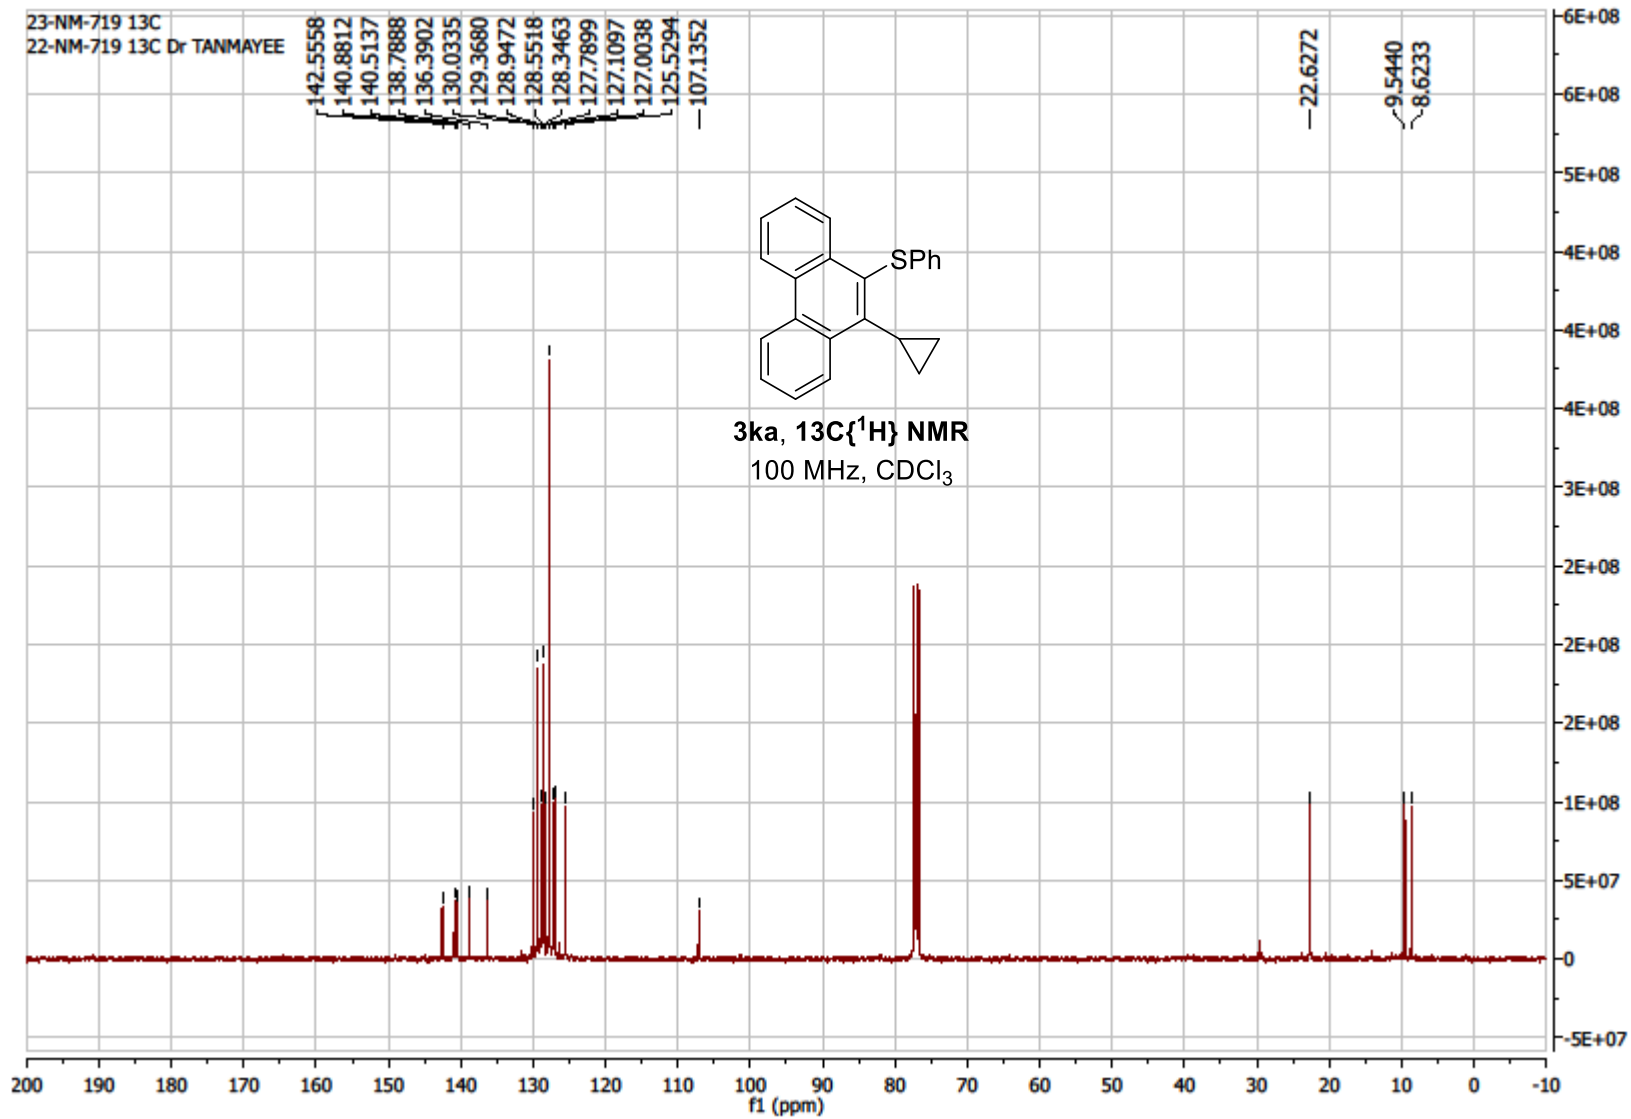



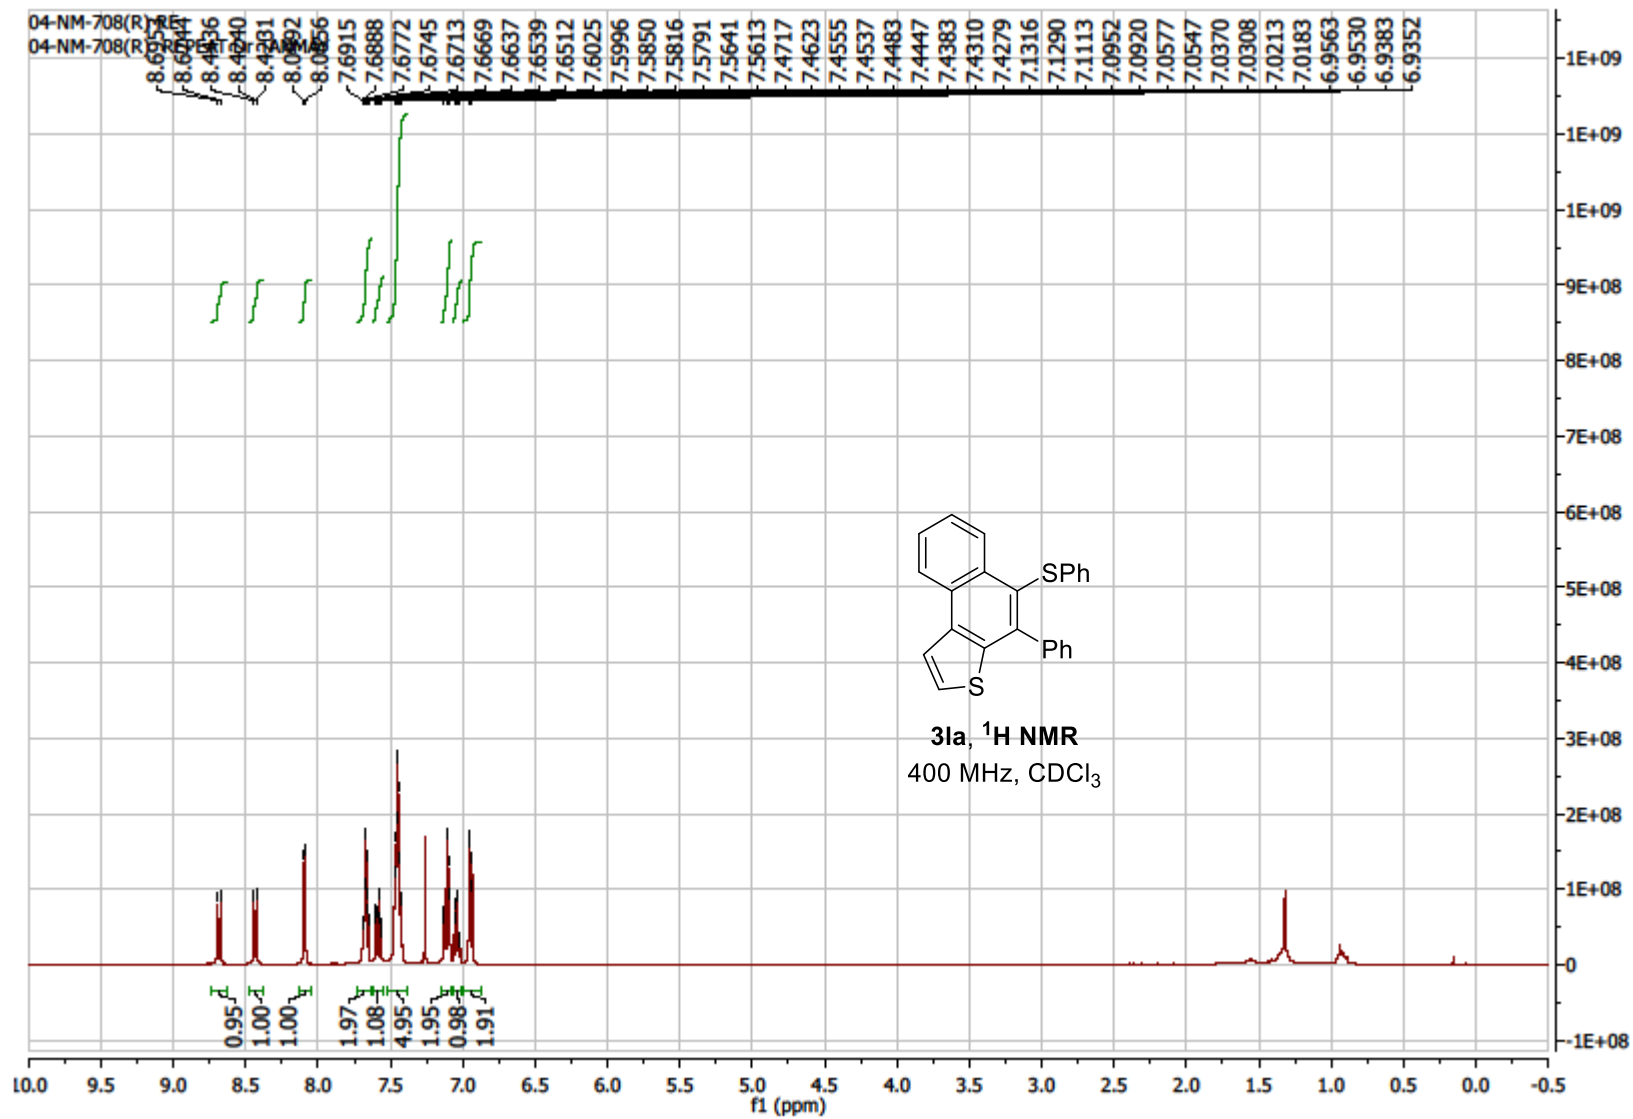

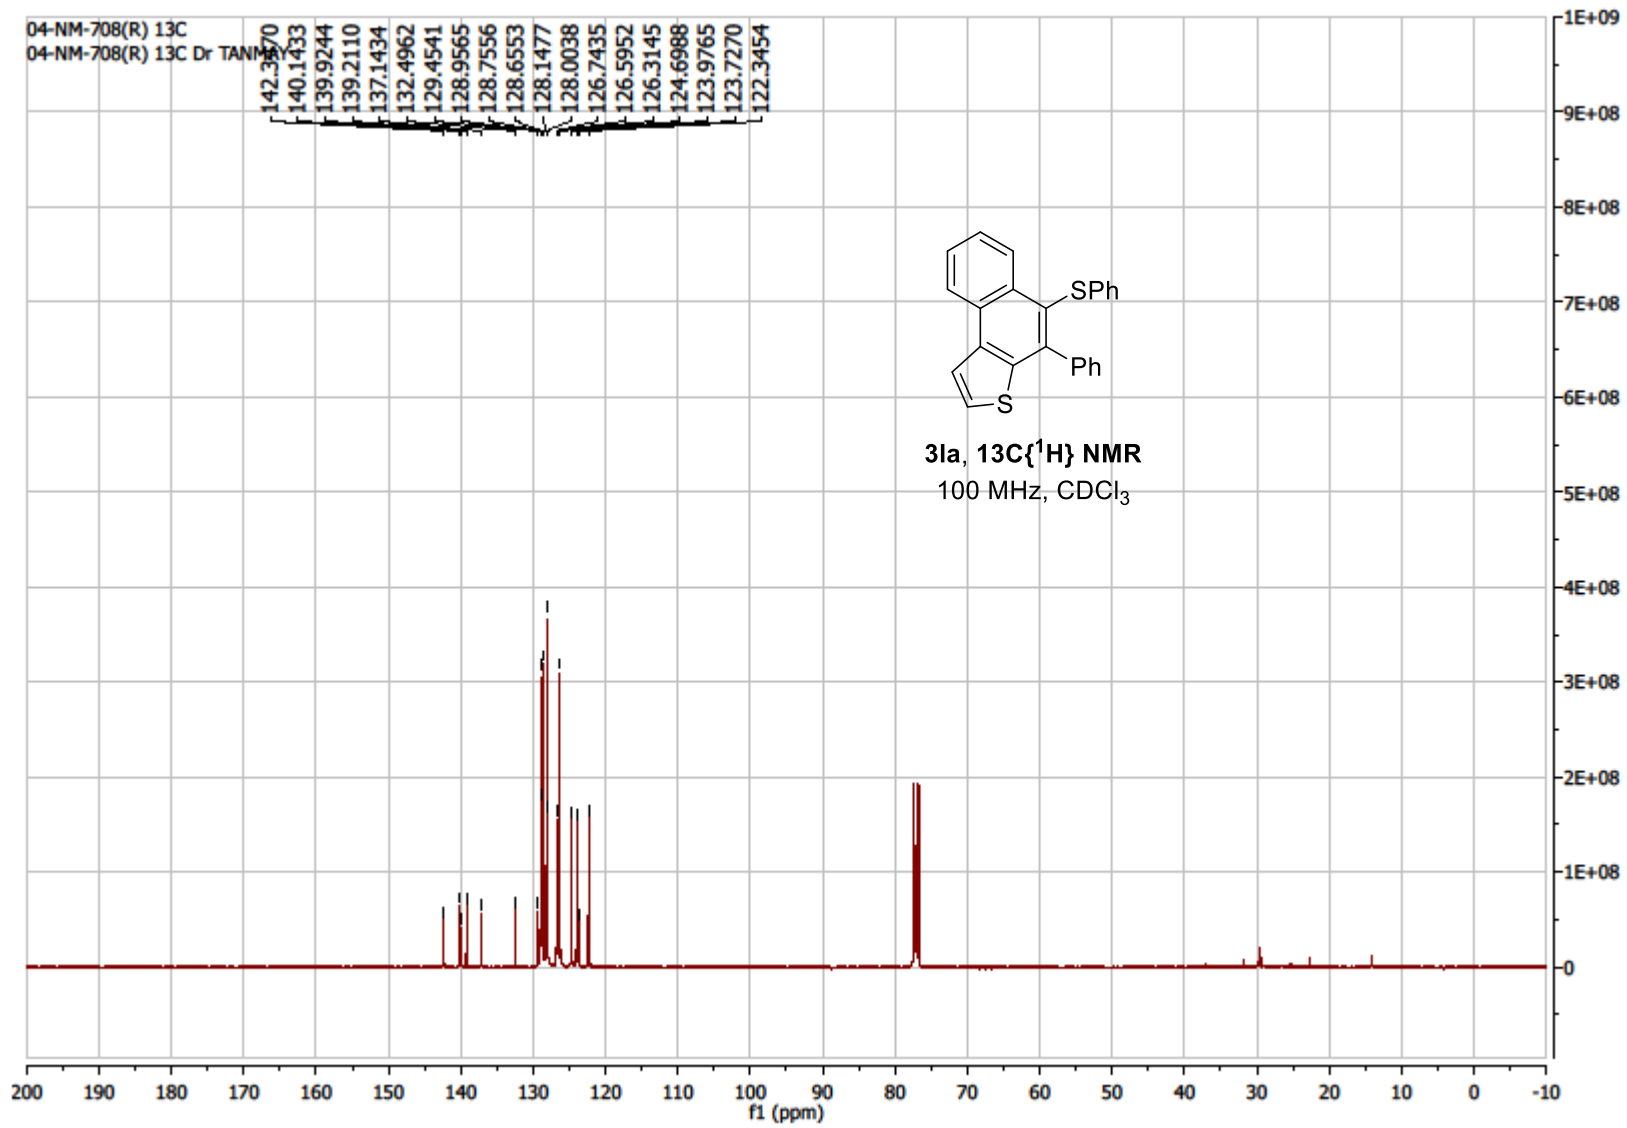

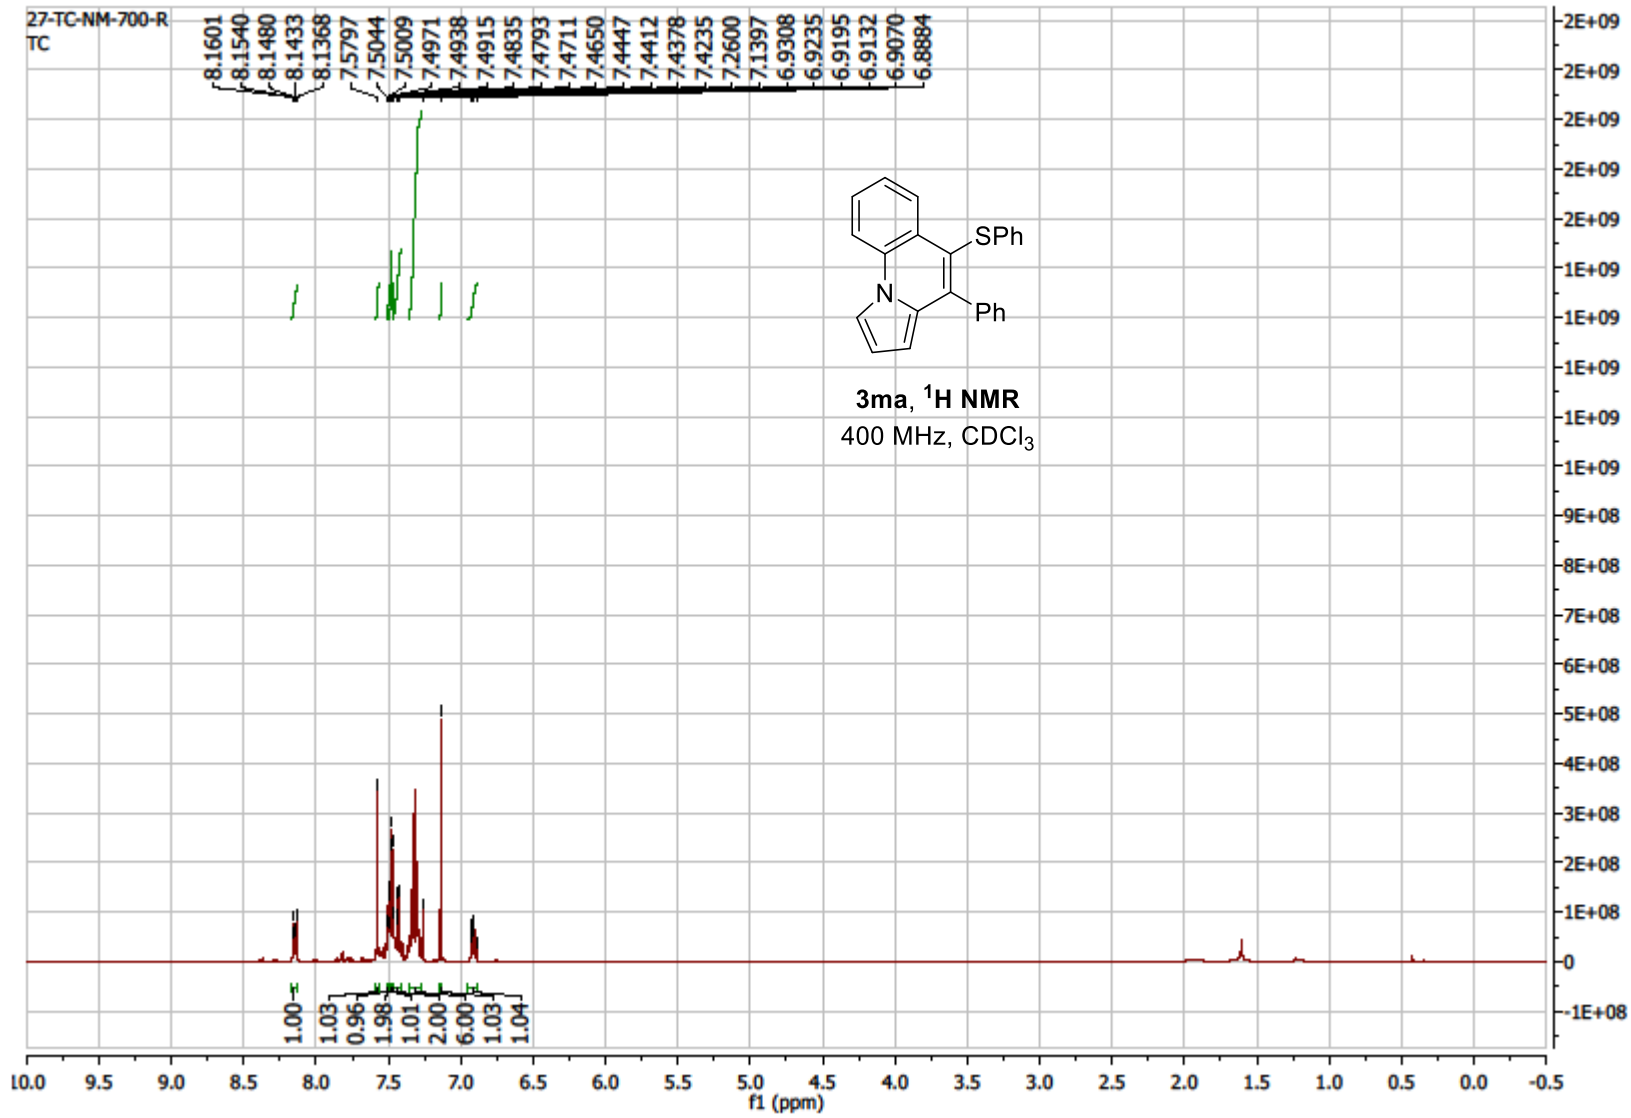

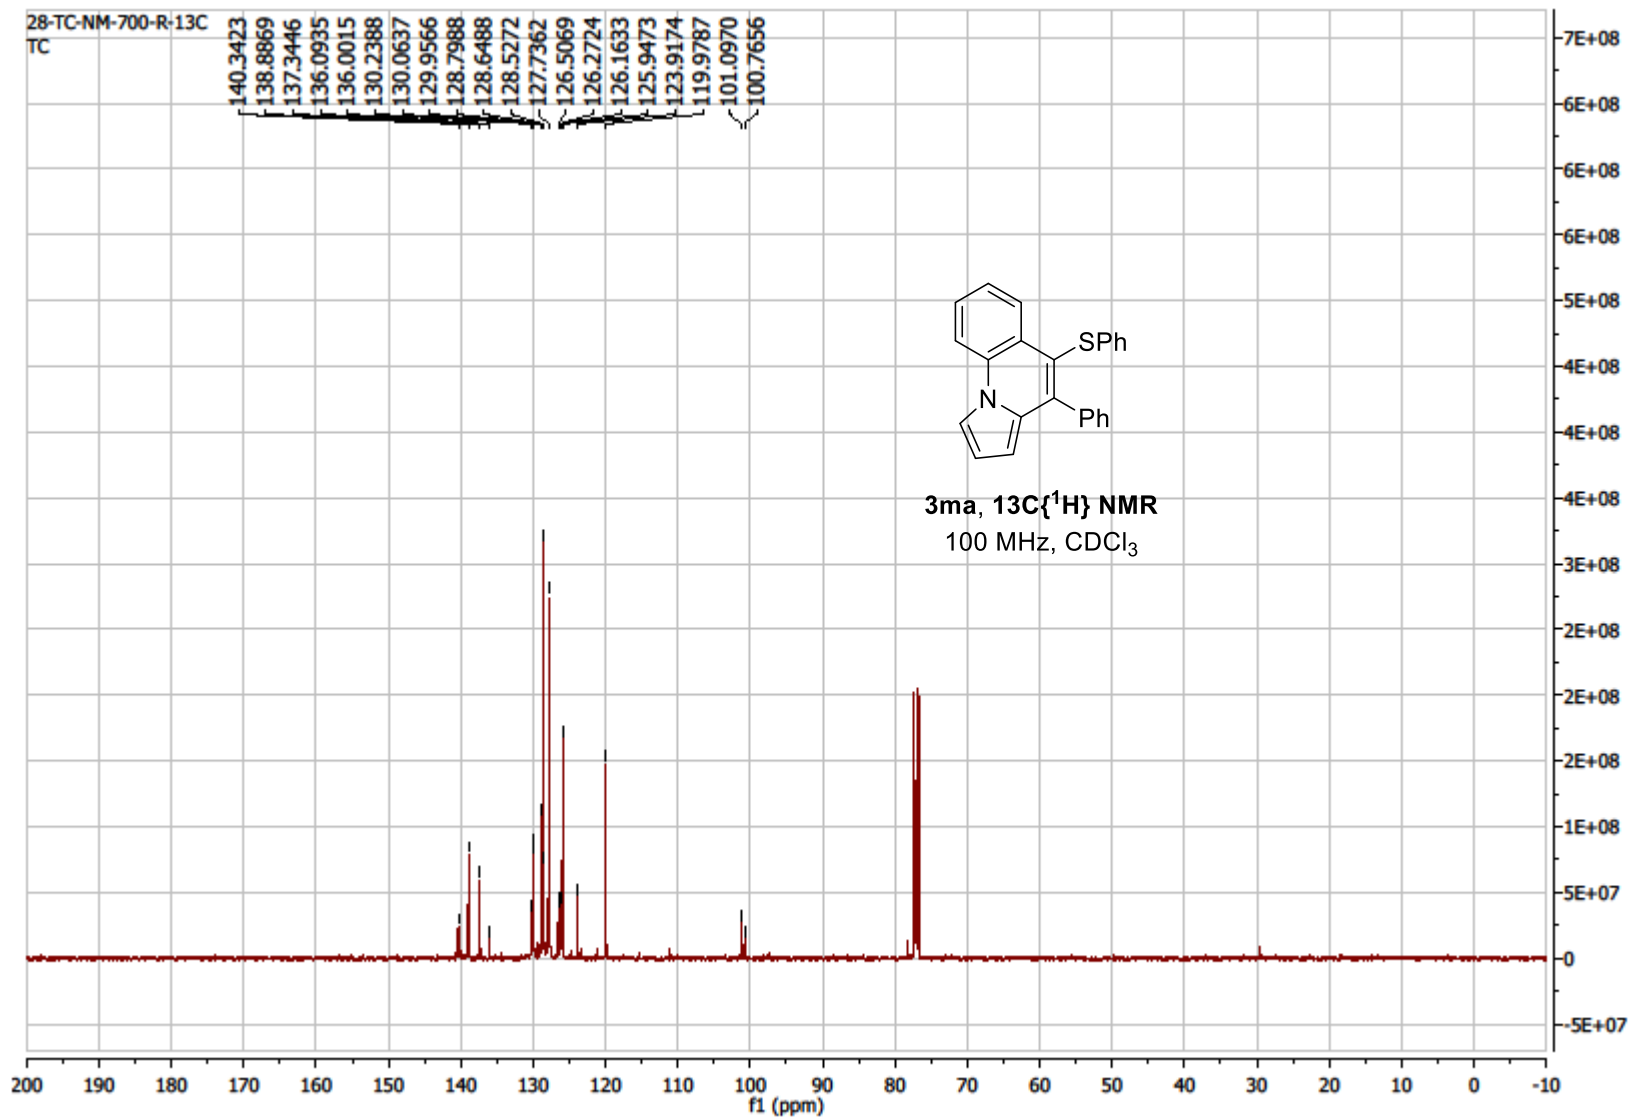

Supplement: d1gc03305k1.pdf [file d1gc03305k1.pdf]
